# Supplementary material for: Severe persistent hypocholesterolemia after emergency gastrointestinal surgery predicts in-hospital mortality in critically ill patients with diffuse peritonitis
Source: PLoS One. 2018 Jul 6;13(7):e0200187. doi: 10.1371/journal.pone.0200187 (PMC6034864; doi:10.1371/journal.pone.0200187)
Supplement: S2 File — (XLSX) [file pone.0200187.s002.xlsx]

## Sheet: 복막염
Number	sex	age	hospital stay	mortality	APACHE II	ASA	Preop shock	postop shock	HTN	DM	CRF	Pul TBC	malignancy	Diagnosis	Location of lesion	surgery type	anastomotic leak	infectious	wound cx	new sepsis	pulmonary	AKI	ileus	blood culture	peritoneal fluid culture	CRP-1	CRP-0	CRP+1	CRP+3	CRP+7	Hb-1	Hb-0	Hb+1	Hb+3	Hb+7	Platelet-1	Platelet-0	Platelet+1	Platelet+3	Platelet+7	Cholesterol-1	Cholesterol-0	Cholesterol+1	choleterol+3	cholesterol+7	Albumin-1	Albumin-0	Albumin+1	Albumin+3
1	1	18	8	0	NA	1	0	0	0	0	0	0	0	1	1	1	0	0	0	0	0	0	0	0	NA	NA	NA	NA	NA	NA	16.6	15.6	14.8	9.3	10.1	267	268	284	NA	NA	119	107	93	110	116	4.4	3.9	3.6	3.8
2	1	20	27	0	12	1	0	0	0	0	0	0	0	1	3	3	0	0	0	0	0	0	1	0	1	NA	NA	218	261	178	11.4	7.9	7.5	6.9	7.2	437	312	280	218	430	87	41	38	43	33	3.7	2.1	2.9	2.9
3	1	20	47	0	NA	1	1	0	0	0	0	0	0	1	3	5	0	0	0	0	0	0	0	0	NA	1	190.43	170	146.88	46.4	10	11.8	7.9	9.7	10.7	369	393	279	325	401	129	54	60	95	106	3.1	1.8	2.7	2.9
4	1	21	25	0	14	1	0	0	0	0	0	0	0	4	4	4	0	0	0	0	0	0	0	0	NA	8.5	57.08	58.88	117.69	35.44	9.6	8.7	7.6	9.2	9.9	202	188	179	234	175	108	111	60	83	100	3.2	3.1	3.2	2.8
5	1	22	14	0	NA	3	0	0	0	0	0	0	0	1	3	3	0	0	1	0	0	0	0	0	0	NA	NA	NA	NA	NA	15.3	14.2	12.8	11.7	11.6	189	196	168	163	199	121	62	48	95	108	4.3	2.9	3.3	3.3
6	1	22	50	0	NA	3	1	1	0	0	0	0	0	1	2	1	0	1	0	0	1	1	0	NA	1	268.65	276.68	147.77	148.49	135.9	9.9	8.9	7.8	9.3	10.1	185	146	55	75	102	72	62	23	62	73	2.7	2.4	2.3	3.2
7	1	23	7	0	NA	1	0	0	0	0	0	0	0	1	1	1	0	0	0	0	0	0	0	NA	NA	NA	1.61	NA	NA	NA	16.5	15.3	14.3	13.7	13.7	434	347	274	235	235	128	110	101	98	100	4.3	3.9	3.4	3.2
8	1	24	17	0	23	1	0	0	0	0	0	0	0	1	4	4	0	0	1	0	0	0	0	NA	1	NA	13.6	NA	243	NA	15.4	10	9.4	8.9	8.5	300	167	157	132	305	125	71	51	66	118	NA	2.7	2.8	2.7
9	1	25	6	0	NA	1	0	0	0	0	0	0	0	1	1	1	0	0	0	0	0	0	0	NA	NA	NA	NA	NA	NA	NA	15.6	12.8	12.5	11.9	8.5	301	258	239	245	NA	140	110	105	93	111	4.5	3.7	NA	NA
10	2	25	7	0	NA	1	0	0	0	0	0	0	0	1	3	1	0	0	0	0	0	0	0	NA	NA	NA	NA	NA	33.8	NA	12.5	10.3	9.6	9.3	10.8	183	149	153	175	284	120	78	74	86	90	4.1	2.7	2.9	3
11	1	26	26	0	NA	1	0	0	0	0	0	0	0	1	3	3	0	0	1	0	0	0	0	0	NA	0.145	NA	13.5	9.26	7.02	13.8	12.2	12	10.4	10.6	229	238	193	177	191	84	54	60	68	64	3.1	2	2.8	2.9
12	1	26	26	0	NA	1	0	0	0	0	0	0	0	1	4	4	0	0	1	0	0	0	1	0	NA	NA	NA	8.88	NA	NA	16.2	14	13.9	10.7	11.6	417	353	341	272	330	96	43	42	44	49	3.8	2	2.4	3.4
13	2	26	37	1	10	1	1	0	0	0	0	0	1	1	4	6	0	1	1	1	1	0	1	0	1	NA	455	208	244	226	10.5	11.2	10.8	10.2	9.5	121	176	217	108	148	159	113	55	64	50	3.8	3.8	2.1	2.5
14	1	26	8	0	NA	1	0	0	0	0	0	0	0	1	2	1	0	0	0	0	0	0	0	NA	NA	NA	NA	6.13	NA	NA	14.6	14.6	15.5	13.1	13.1	NA	340	332	244	402	152	143	129	121	115	NA	4.4	4.1	3.5
15	1	28	7	0	NA	1	0	0	0	0	0	0	0	1	1	1	0	0	0	0	0	0	0	NA	NA	NA	NA	NA	NA	NA	14.7	13.2	12.6	12.3	14.4	370	210	231	NA	345	136	126	120	123	129	4.7	3.9	3.7	NA
16	1	28	4	0	NA	1	0	0	0	0	0	0	0	1	1	1	0	0	0	0	0	0	0	NA	NA	NA	NA	163.1	69.9	NA	15	14.1	13	11.5	12.2	296	236	184	187	241	111	98	71	90	101	4.1	3.9	3.6	3.4
17	1	28	16	0	19	1	0	0	0	0	0	0	0	1	4	6	0	0	0	0	0	0	1	0	1	269.71	259.69	299.87	157.12	47.45	9.5	10.6	10.1	10.3	8.5	113	101	121	232	431	127	123	107	146	144	3.5	3.4	2.5	3.2
18	1	29	5	0	NA	1	0	0	0	0	0	0	0	1	1	1	0	0	0	0	0	0	0	NA	NA	NA	NA	NA	NA	NA	15.9	15.9	14.7	14.3	12.9	NA	206	196	192	NA	162	154	129	125	128	NA	4.6	3.9	3.8
19	1	29	6	0	NA	1	0	0	0	0	0	0	0	1	1	1	0	0	1	0	0	0	0	NA	NA	NA	NA	NA	NA	NA	14.9	13.8	12.4	11.1	12.2	267	244	220	197	NA	209	172	144	159	163	4.4	3.5	3.5	3.4
20	1	29	21	0	NA	1	0	0	0	0	0	0	0	1	3	3	0	0	0	0	0	0	1	0	0	256.19	NA	250.41	198.43	96.24	14	12.9	11.5	12.3	12.1	226	227	234	329	563	77	44	53	87	134	3.2	2	3	2.9
21	1	29	9	0	NA	2	0	0	0	0	0	0	1	2	3	3	0	0	1	0	0	0	0	NA	NA	NA	NA	NA	NA	9.46	14.7	12.6	8.7	7.5	8.2	371	NA	270	277	571	163	157	82	101	179	NA	3.7	2.3	3
22	2	30	9	0	NA	1	0	0	0	0	0	0	0	1	3	3	0	0	0	0	0	0	0	NA	NA	12.7	12.8	NA	NA	0.452	12.6	11.7	10	10.2	10.2	844	788	766	860	848	120	69	70	59	100	3	1.7	2.6	2.6
23	2	31	9	0	NA	2	0	0	0	0	0	0	0	1	2	1	0	0	0	0	0	0	0	NA	NA	NA	NA	NA	NA	NA	13.8	12.2	12.4	13	12.9	211	184	207	255	344	146	107	111	130	119	4.3	3.4	3.4	3.7
24	1	31	7	0	9	1	0	0	0	0	0	0	0	1	1	1	0	0	0	0	0	0	0	NA	0	NA	NA	11.1	9.75	3.81	14.1	12.3	11.6	11.4	12.2	238	190	191	208	271	133	87	75	88	84	4.7	3.4	3.2	3.3
25	2	31	11	0	NA	1	0	0	0	0	0	0	0	1	1	1	0	0	0	0	0	0	0	0	0	NA	NA	NA	NA	NA	11.2	11.2	9.9	9	9.8	377	369	309	332	332	210	192	162	154	145	NA	4.2	3.6	3.3
26	1	31	5	0	NA	1	0	0	0	0	0	0	0	1	1	1	0	0	0	0	0	0	0	NA	NA	NA	1.26	NA	NA	NA	16.8	10.6	14.8	14.4	14.4	336	NA	271	308	NA	306	288	254	266	255	5.3	NA	4.2	4.1
27	1	31	33	0	17	1	0	0	0	0	0	0	0	1	3	5	0	0	0	0	0	0	0	0	NA	161	10.7	NA	169	19.9	15.8	10.6	11.1	8.3	9.1	748	481	583	408	572	122	33	38	54	64	3.2	1	1.8	2.8
28	1	32	7	0	NA	1	0	0	0	0	0	0	0	1	1	1	0	0	0	0	0	0	0	NA	NA	NA	NA	NA	20.5	NA	14.7	14.7	12.7	11.8	12.3	NA	263	213	198	236	182	172	128	123	145	NA	4.7	3.5	3.4
29	1	32	6	0	NA	1	0	0	0	0	0	0	0	1	1	1	0	0	0	0	0	0	0	NA	NA	NA	54.64	NA	47.82	NA	14.9	13.1	12.7	11.3	11.5	257	219	NA	218	NA	150	106	111	116	118	4.5	3.6	NA	3.2
30	2	33	30	0	30	1	1	0	0	0	0	0	0	1	1	1	0	0	1	0	0	0	0	0	1	NA	31.5	NA	NA	NA	10.9	10.9	11.4	12	11.5	175	175	157	147	571	60	31	34	50	49	2.1	2.5	2.9	2.8
31	1	33	22	0	21	1	1	1	0	0	0	0	0	1	3	3	0	1	1	0	0	0	0	NA	NA	NA	NA	283	NA	NA	17.6	15.6	15.4	12.2	13.6	422	262	316	205	429	257	90	76	86	107	4.9	2.3	3.5	3.1
32	1	33	11	1	11	4	1	1	0	0	0	0	0	1	4	4	0	1	0	1	1	1	1	1	1	327.98	NA	195.77	118.29	189.35	10	8.6	8.5	7	8.2	68	78	88	55	62	140	95	95	70	50	1.9	3.2	2.7	3.2
33	2	34	48	0	NA	1	0	0	0	0	0	0	0	1	3	3	0	0	0	0	0	0	0	NA	NA	45.7	NA	13.5	11.7	4.13	11.9	9.6	12	9.7	9.7	353	277	304	293	573	73	69	67	72	90	2.7	NA	2	2.6
34	1	35	46	0	22	3	1	0	1	0	0	0	0	1	4	6	0	1	0	0	0	1	0	0	1	NA	34.4	3.32	NA	NA	15.2	12.4	12.7	8.7	8	110	130	108	60	66	154	101	98	95	80	2.7	2.6	2.7	3
35	2	35	12	0	NA	1	0	0	0	0	0	0	0	1	4	6	0	0	0	0	0	0	0	0	NA	NA	NA	100.99	NA	16.98	12.3	12.3	8.1	7.8	7.9	NA	498	330	267	311	153	149	42	70	74	NA	3	2.4	2.7
36	2	35	19	0	25	2	1	1	1	1	0	0	0	1	4	4	0	0	0	0	0	0	0	0	0	11.1	30.49	83.01	45.98	16	11.7	13.4	8	11.8	10.9	262	258	138	126	128	162	42	33	70	121	3.9	1.5	2.9	3.7
37	1	35	16	0	NA	1	0	0	0	0	0	0	1	4	4	5	0	1	0	0	0	0	1	NA	NA	NA	177.24	313.22	188.79	109.75	10.5	11.2	10.1	9.5	11.1	179	179	186	228	543	106	103	84	91	135	3.3	3.5	3	3.5
38	1	36	16	0	20	3	0	0	0	0	0	0	0	1	2	3	0	0	0	0	0	0	0	NA	NA	NA	NA	NA	NA	NA	16.1	14.2	11	8.7	11.4	217	196	180	251	775	109	51	50	83	94	3	1.9	3.1	2.9
39	1	36	51	0	23	1	1	1	0	0	0	0	0	1	4	4	0	1	1	0	0	1	1	NA	NA	NA	NA	NA	NA	288	13.2	15.2	12.9	10.1	7.4	13.2	15.2	12.9	10.1	7.4	113	52	48	45	67	3.8	2.3	3.1	3
40	2	36	9	0	8	1	0	0	0	0	0	0	0	1	3	3	0	0	0	0	0	0	0	0	0	NA	47.1	163	NA	18.8	12.9	10.7	10.6	9.6	9.7	375	181	173	201	252	125	86	75	110	116	NA	3.3	2.9	3.1
41	2	36	57	0	NA	3	1	0	0	0	0	0	0	1	3	5	0	1	1	0	1	0	1	0	1	16.71	NA	NA	NA	251.68	12	12.9	8.2	9.1	8.6	316	350	240	244	287	121	63	40	54	32	2.7	1.7	2.7	3
42	1	36	7	0	NA	1	0	0	0	0	0	0	0	1	1	1	0	0	0	0	0	0	0	NA	NA	NA	NA	NA	NA	NA	14.5	14.5	13	11.5	12.3	NA	172	136	130	172	125	123	88	82	108	NA	4.4	3.4	2.9
43	1	37	41	0	13	1	0	0	0	0	0	0	1	4	4	6	0	1	1	0	1	0	0	NA	1	59	267.12	99.5	103.54	84.27	9.8	10.4	6.6	10.3	9.9	547	479	268	247	559	120	115	42	76	102	2.8	NA	1.6	2.7
44	2	37	16	0	11	1	0	0	0	0	0	0	0	1	1	1	0	0	0	0	0	0	0	0	0	NA	NA	218.02	213.22	NA	11.7	9.6	8.5	8.3	7.9	109	74	74	70	117	141	107	97	118	97	2.8	2.5	2.7	3.3
45	1	38	11	0	NA	2	0	0	0	0	0	0	1	1	4	6	0	0	0	0	0	0	0	1	0	NA	8.13	NA	21.4	3.02	13.3	13.5	11.1	9.7	10	NA	334	254	266	553	163	151	82	71	71	NA	3.6	2.3	3.2
46	1	38	8	0	NA	1	0	0	0	0	0	0	1	1	4	6	0	0	0	0	0	0	0	NA	NA	NA	89.97	165.16	186.54	NA	15.6	13.3	13	13.6	13.4	372	336	276	308	396	182	115	105	129	162	4.4	2.9	3.3	3.3
47	1	38	29	0	8	1	0	0	0	0	0	0	1	1	3	3	0	0	0	0	0	0	0	NA	NA	21.86	NA	268.39	158.64	33.61	11	10.1	8.2	9	9.2	457	431	300	267	570	132	71	67	85	84	4.8	2.8	2.8	3
48	2	38	136	0	10	4	1	0	0	0	0	0	1	1	3	5	0	1	1	0	0	0	0	NA	NA	46.62	42.39	73.85	104.3	26.49	7.3	7.6	7.3	10.5	10.1	64	83	106	75	60	84	64	86	90	97	2.1	2.4	3	3
49	2	39	19	1	NA	1	0	1	0	0	0	0	1	1	2	1	0	0	1	0	0	0	0	NA	1	NA	24.5	NA	NA	NA	12.1	12	7.3	10.5	8.8	38	43	66	39	16	151	101	70	59	60	3.6	2.4	2.8	2.8
50	2	39	9	0	NA	1	0	0	0	0	0	0	0	1	2	1	0	0	0	0	0	0	0	NA	NA	NA	NA	29.34	29.34	NA	12.8	11.8	10.9	10.8	11.7	NA	241	218	248	NA	148	125	124	132	138	NA	NA	3.3	3.3
51	1	40	8	0	NA	1	0	0	0	0	0	0	0	1	4	1	0	0	0	0	0	0	0	0	NA	NA	NA	9.05	NA	NA	13.1	15.4	12.8	11.7	11.9	NA	210	150	140	167	198	187	134	112	118	NA	4.9	3.7	3.4
52	1	40	13	0	NA	1	0	0	0	0	0	0	0	1	1	1	0	0	0	0	0	0	0	NA	NA	NA	NA	NA	NA	NA	10.9	15.4	13.1	11.8	13.5	NA	143	146	112	216	142	133	82	79	99	NA	5	3.9	3.5
53	1	40	169	0	14	2	1	0	0	0	0	0	0	1	1	1	1	1	1	0	1	0	0	NA	1	261	171	116	189.67	201	9.6	10.2	11.7	10.3	8.2	312	379	342	377	246	61	70	69	48	35	3.4	2.4	2.9	2.6
54	1	41	5	0	13	1	0	0	0	0	0	0	0	1	1	1	0	0	0	0	0	0	0	0	NA	NA	11.7	132	18.4	NA	16.3	14.7	13.8	13.9	14.3	187	190	162	175	193	156	124	106	123	118	4.5	3.9	3.4	3.4
55	1	41	88	1	NA	3	0	1	0	0	0	0	1	1	1	1	0	1	1	0	0	0	0	NA	1	141	94	131	229	165	10.3	8	9.3	10.1	9.2	118	68	99	109	69	36	32	32	31	32	2.4	1.3	2.8	3
56	1	41	5	0	NA	1	0	1	0	0	0	0	0	1	4	4	0	1	0	0	0	0	0	0	NA	NA	NA	NA	200	NA	13.8	12.8	12.1	12.3	11.9	211	201	177	214	NA	140	119	104	105	115	4	3.6	3.1	3.2
57	2	41	14	0	21	1	1	1	0	0	0	0	1	1	3	5	0	0	1	0	0	0	0	1	1	NA	17.58	52.6	110.47	87.56	12.6	14.4	11.1	10	11.2	378	61	134	17	55	118	107	19	33	66	1.8	2.3	2.7	2.8
58	1	41	17	0	NA	1	0	0	0	0	0	0	1	4	4	5	0	0	0	0	0	0	1	NA	NA	NA	214.2	NA	NA	51.57	10.6	10.3	10.6	9.2	11.8	297	267	237	242	506	161	181	126	114	145	3.2	3.3	2.6	2.7
59	1	42	36	0	NA	1	1	1	1	0	0	0	0	1	3	3	0	1	0	0	1	1	0	0	1	NA	NA	NA	NA	22.9	9.6	11.6	11	9.9	9.6	135	117	65	52	86	90	98	63	71	71	2.7	NA	3.3	2.7
60	1	42	7	0	NA	1	0	0	0	0	0	0	0	1	3	3	0	0	0	0	0	0	0	NA	NA	NA	NA	NA	NA	NA	14.5	13.3	12.3	11.8	12.3	172	152	169	140	169	254	217	186	228	179	4.7	3.9	3.5	3.6
61	1	42	9	0	NA	1	0	0	0	0	0	0	0	1	1	1	0	0	1	0	0	0	0	NA	NA	NA	NA	NA	NA	NA	15.9	15.9	12.5	11.2	10.4	NA	322	208	210	NA	200	191	81	121	135	NA	5.4	3.1	3.1
62	2	43	33	0	29	1	0	0	0	0	0	0	1	1	4	6	0	1	1	0	0	0	0	0	1	7.52	NA	NA	NA	3.44	10.3	10.3	9.9	9.7	10.4	88	100	94	213	318	198	136	56	53	53	4	2.9	1.3	2.8
63	2	43	14	0	10	1	0	0	0	0	0	0	0	1	4	4	0	0	0	0	0	0	0	NA	NA	NA	NA	NA	NA	NA	10.9	9.7	9.5	9	10.6	175	163	181	219	430	95	69	64	71	98	3.2	2.4	2.6	2.9
64	1	43	97	0	NA	3	0	1	1	0	0	0	0	1	4	4	0	0	0	0	0	1	0	NA	1	120.73	NA	77.57	202	160.95	10.4	10.3	7.9	8.2	9.2	218	213	194	230	501	161	181	126	123	118	3	3	1.8	3
65	1	43	27	0	NA	1	0	0	0	0	0	0	0	4	4	4	0	0	0	0	0	0	1	1	0	91.27	NA	NA	188.73	45.29	12.7	11.9	11.6	12.5	11.9	357	457	421	714	659	178	170	154	153	119	3.1	2.7	2.9	2.9
66	2	43	12	0	10	1	0	0	0	0	0	0	0	1	3	3	0	0	0	0	0	0	0	0	NA	NA	76.23	150.67	NA	13.46	10.7	11	10.7	9.8	10.7	NA	294	322	200	247	198	186	129	143	160	NA	3.8	2.7	3
67	1	43	7	0	NA	1	0	0	0	0	0	0	0	1	3	1	0	0	0	0	0	0	0	0	NA	5.41	NA	NA	NA	NA	12	10.7	8.9	9.3	10.5	226	191	174	176	212	124	110	92	92	84	4.1	3.6	2.8	3.2
68	2	43	15	0	16	2	0	1	0	0	0	0	0	1	1	1	0	1	1	0	0	0	0	NA	NA	NA	69.93	NA	NA	NA	8.8	8.4	7.5	7.6	10.3	277	251	246	269	329	115	88	71	140	133	3.3	2.7	2.8	3.2
69	2	43	30	1	32	1	1	1	0	0	0	0	1	1	3	5	1	1	1	1	1	0	0	0	1	371.86	NA	89.24	NA	NA	12.4	10.1	6.8	10.3	10.3	615	51	86	59	159	82	30	81	61	73	2.9	2.4	3.2	2.4
70	2	43	21	0	NA	1	0	0	0	0	0	1	1	1	3	1	0	0	1	0	0	0	0	NA	1	16.84	68.02	156	154.92	34.8	10.8	11.8	11.3	10.7	11.1	139	136	125	130	220	112	107	102	110	80	3.1	2.6	2.5	3
71	2	44	20	0	NA	1	0	0	0	0	0	0	1	1	4	4	0	0	0	0	0	0	0	NA	NA	1	NA	NA	NA	3.78	12.8	12.3	12.1	10.2	10.2	186	179	171	215	366	115	100	81	101	101	NA	3.7	2.3	3.1
72	2	44	54	1	NA	1	0	0	0	0	0	0	1	1	4	1	1	0	0	0	0	0	0	NA	1	18.5	17	15.7	18.8	12.6	10	8.4	8.4	11.3	9.9	424	320	278	226	220	109	76	46	66	50	2.2	2.4	1.6	2.6
73	2	44	11	0	NA	1	0	0	0	0	0	0	1	1	1	2	0	0	1	0	0	0	0	NA	NA	NA	0.132	7.06	NA	NA	9.8	10.8	8.2	9.8	10.2	144	234	173	220	316	179	138	64	90	94	4.1	3.7	2	3
74	1	44	14	0	NA	1	0	0	0	0	0	0	0	1	3	3	0	0	0	0	0	0	0	NA	NA	NA	NA	NA	57.17	NA	16.2	17.1	12.7	11.8	12	244	249	184	279	371	205	100	90	74	88	4.7	3	2.8	2.7
75	1	44	20	0	17	2	0	0	1	0	0	0	0	2	3	3	0	0	1	0	0	0	0	0	NA	NA	NA	354.67	180.39	0.4	16.2	13.7	13.8	10.2	10.6	225	140	130	136	290	184	71	64	65	145	4.9	2.5	2.1	2.9
76	1	45	18	0	28	3	1	1	0	0	0	0	0	1	4	6	0	0	0	0	0	0	0	0	0	NA	1.74	123	149.42	18.42	14	12	12.3	8.8	11.4	219	175	170	61	159	118	35	34	56	80	4.1	1.8	3.3	2.8
77	2	45	13	0	NA	1	0	0	0	0	0	0	1	1	3	5	0	0	0	0	0	0	0	NA	NA	NA	76.93	280.5	172.6	23.88	12	13.7	11	11.1	12.7	113	119	105	155	330	139	109	96	144	197	3.7	2.7	2.8	3.2
78	1	46	25	0	NA	1	0	0	0	0	0	0	0	1	3	3	0	0	0	0	0	0	0	NA	NA	0.825	NA	14.8	18	1.54	11.8	13	10.5	11.6	10.9	581	434	288	290	372	98	72	54	70	63	3.7	3.2	2.7	3.1
79	2	46	7	0	17	1	0	0	0	0	0	0	0	1	1	1	0	0	0	0	0	0	0	0	NA	NA	NA	69.9	NA	NA	12.4	10.5	10.8	10.5	10.8	172	147	166	178	NA	192	161	173	179	180	4.2	3.6	3.4	3.5
80	2	46	21	0	16	1	1	0	0	0	0	0	1	1	4	5	0	0	0	0	0	0	0	1	NA	203	162.53	214.17	NA	138	8.1	7.6	9.1	8.8	9.1	103	136	114	68	148	115	40	34	61	94	2.9	2	2.7	2.9
81	1	46	14	0	6	1	0	0	0	0	0	0	0	1	3	3	0	0	1	0	1	0	0	0	NA	NA	NA	NA	NA	NA	15.1	12.8	11.1	11.4	12	203	189	173	205	464	116	109	76	100	128	3.2	2.9	3	3.1
82	2	47	16	0	NA	1	0	0	1	0	0	0	1	1	4	5	0	0	0	0	0	0	0	NA	NA	9.51	NA	NA	NA	NA	9.1	8.9	13	9	9.2	451	489	390	273	416	157	140	118	79	97	3.6	3.4	2.9	2.7
83	2	47	30	1	25	1	0	1	0	0	0	0	1	4	3	6	0	1	1	0	1	0	0	NA	NA	9.92	NA	112	NA	158	9.7	9.5	8	9.1	9.2	132	132	98	65	72	154	60	70	82	79	2.8	1.3	2.6	2.7
84	1	47	5	0	15	1	0	0	0	0	0	0	0	1	1	1	0	0	0	0	0	0	0	NA	NA	3.13	NA	NA	77.1	NA	16.1	13.5	14.6	14.2	14.8	438	334	299	290	383	172	90	104	144	150	4.8	3.2	3.5	3.9
85	2	47	9	0	15	2	0	0	0	0	0	0	0	1	3	3	0	0	0	0	0	0	0	0	NA	NA	28.4	NA	NA	NA	12.9	12.7	10	10.8	11.6	252	290	260	283	467	153	114	100	147	120	3.8	2.6	3.3	3.6
86	2	47	9	0	11	1	1	0	0	0	0	0	0	1	3	3	0	0	1	0	0	0	0	NA	NA	NA	122.29	NA	96.7	37.92	14.2	12.1	9.6	11.3	10.5	262	210	181	261	451	149	64	65	129	130	3.9	2.1	3.1	2.7
87	1	47	8	0	NA	1	0	0	0	0	0	0	0	1	1	1	0	0	0	0	0	0	0	NA	NA	NA	72.32	169.71	99.26	21.71	16.2	13.4	12.8	11.7	12.1	201	163	154	173	236	233	156	140	141	127	4.7	3.5	3.2	3
88	1	47	8	0	NA	1	0	0	0	0	0	0	1	1	3	2	0	0	0	0	0	0	0	0	NA	NA	153.97	NA	NA	NA	12.6	12.2	11.1	10	11.4	221	192	195	252	453	209	149	121	138	161	3.8	2.8	2.6	2.9
89	2	48	21	1	35	4	1	1	0	0	0	0	0	4	4	5	0	1	0	1	0	0	0	NA	1	NA	NA	7.62	3.46	6.26	11.9	13.1	10.5	9.8	8.9	101	31	54	64	91	204	85	107	66	86	2.7	1.6	3.8	2.7
90	1	48	53	0	26	1	1	0	0	0	0	0	0	1	2	1	1	0	0	0	0	0	0	0	1	NA	28.2	25	NA	NA	11.3	13.5	11.1	11.6	13.2	469	380	355	440	566	71	40	53	72	96	2.4	3.2	2.4	3.1
91	1	48	81	0	32	1	0	0	0	0	0	0	1	1	3	3	0	0	0	0	0	0	0	0	0	NA	NA	NA	236.92	107.2	15.7	10.7	10.4	9.7	10.3	337	150	141	123	717	191	81	84	100	123	4.1	2.2	2.7	NA
92	1	49	35	0	18	3	1	0	0	0	0	0	1	1	1	1	0	0	0	0	0	0	0	NA	1	NA	31.1	NA	NA	NA	12.4	9.1	9.6	8.3	10.7	227	110	120	127	176	127	69	71	49	49	3.5	2.3	2.5	2.8
93	1	49	7	0	NA	1	0	0	0	0	0	0	0	1	1	1	0	0	0	0	0	0	0	NA	NA	NA	0.187	NA	NA	NA	16.2	15.9	13.9	15	16.5	269	253	189	235	283	191	81	92	115	123	4.6	NA	2.7	4
94	1	49	21	0	28	1	0	0	0	0	0	0	1	1	1	1	0	0	0	0	0	0	0	0	0	NA	14.2	NA	NA	NA	13.8	9.2	8.8	8.8	11.7	344	188	178	169	209	123	65	44	61	62	2.6	1.6	2.4	2.1
95	1	49	22	0	16	2	0	0	1	0	0	0	0	1	3	3	0	0	0	0	0	0	0	NA	1	13.2	117	216	NA	NA	9.2	10.4	7.2	7.2	8.2	355	358	273	284	392	88	40	41	51	77	3.4	2.3	2.9	3.2
96	2	49	4	0	NA	2	0	0	0	1	0	0	0	1	4	1	1	0	0	0	0	0	0	NA	NA	NA	NA	NA	NA	NA	14.7	13.8	12.8	13.4	13.5	429	370	328	389	NA	176	159	147	157	160	3.9	3.6	3.1	3.5
97	1	50	14	0	34	3	1	0	1	1	0	0	1	1	1	1	0	0	1	0	0	1	0	0	1	NA	NA	NA	NA	7.92	10.7	10.9	9.8	12.1	11.6	144	128	103	113	183	82	78	55	81	60	3.3	2.7	2.8	3
98	1	50	70	0	14	1	1	0	0	0	0	0	0	1	3	3	0	0	0	0	0	0	0	NA	NA	NA	NA	NA	NA	NA	13.2	10.7	8.8	10.9	10.1	168	148	134	226	277	140	89	95	126	99	NA	2.5	2.9	3.2
99	2	50	25	0	34	1	0	0	0	0	0	0	1	1	4	6	0	0	1	0	0	0	0	0	0	NA	238	NA	NA	97.1	14.1	11.3	9.8	9.9	8.6	181	122	159	341	478	102	47	72	110	127	2.7	1.9	2.3	NA
100	2	50	20	0	18	1	0	0	0	0	0	0	0	1	3	1	0	0	0	0	0	0	0	NA	0	NA	2.44	NA	NA	NA	12	12	9.2	8.8	8.7	458	466	309	296	363	169	75	65	87	74	4.4	2.1	3.4	3.2
101	1	50	20	0	NA	1	0	0	0	0	0	0	1	1	1	1	0	0	0	0	0	0	0	NA	0	NA	NA	194	106	21.3	9.5	8.7	7.9	7.4	8.5	383	360	402	421	641	141	86	84	90	78	3.9	2.7	2.7	2.9
102	1	50	29	0	NA	1	0	0	0	0	0	0	1	1	1	1	0	0	0	0	0	0	0	NA	NA	NA	NA	NA	188.21	75.2	12.2	11.1	10.3	10.9	10.5	270	251	188	231	274	229	223	181	199	228	3.1	2.9	3.2	2.9
103	1	50	15	0	15	1	0	0	0	0	0	0	1	1	1	2	0	0	0	0	0	0	0	NA	0	9.08	155.84	NA	NA	NA	7.8	9	9.4	8.2	7.5	384	353	362	318	431	161	112	81	86	126	3.6	2.9	2.4	2.9
104	1	50	17	0	NA	1	0	0	0	0	0	0	1	4	4	6	0	0	0	0	0	0	0	NA	NA	124.75	84.75	73.88	66.29	NA	10.3	10.8	10.6	11.3	12.1	525	617	650	765	NA	126	139	133	143	150	2.7	2.8	2.8	3.3
105	2	50	57	0	25	3	0	0	0	0	0	0	1	4	4	5	1	1	1	0	1	0	0	NA	1	NA	NA	NA	123.08	126.85	8.6	9.7	8.8	8.1	10.4	128	110	132	191	267	98	37	48	104	105	2.6	1.5	2.5	2.6
106	1	51	12	0	NA	1	0	0	1	0	1	0	0	1	1	1	0	0	0	0	0	1	0	0	NA	NA	NA	NA	NA	NA	9.9	9	7.5	8.6	9.1	166	141	121	112	169	236	176	167	172	180	4	3.1	3.1	2.9
107	1	51	19	0	32	1	0	0	0	0	0	0	0	1	3	3	0	0	1	0	0	0	0	0	0	NA	NA	NA	NA	NA	12.8	15.3	14.7	11	13.3	231	281	347	348	708	70	42	42	60	84	2.6	1.8	2.7	2.7
108	2	51	8	0	NA	1	0	0	0	0	0	0	0	1	3	3	0	0	0	0	0	0	0	0	NA	NA	14.3	101	31.8	NA	14.8	13.5	11.8	11.6	12.1	232	211	155	214	NA	170	124	102	128	134	4.4	3.4	2.9	3.2
109	2	51	13	0	NA	2	0	0	1	0	0	0	0	1	4	4	0	0	0	0	0	0	0	0	NA	NA	NA	183	120	NA	12.6	6.6	8.6	8.3	8.4	393	240	244	256	422	148	54	72	121	156	4.2	3.9	3.7	3.1
110	2	51	46	0	17	2	0	0	0	0	0	0	0	1	2	1	0	0	0	0	0	0	0	NA	0	NA	NA	NA	NA	NA	13.5	9.8	8.6	9.2	6.5	71	92	126	136	191	183	98	93	136	112	2.9	2.7	3.1	2.7
111	2	51	32	0	11	1	0	0	1	0	0	0	1	1	2	1	0	0	0	0	0	0	0	0	0	NA	NA	241.4	213.58	NA	12	12.8	8.8	8.4	8.3	232	335	218	255	373	153	91	65	106	135	3.7	2.5	3.1	3
112	1	52	14	0	32	1	1	1	0	0	0	0	1	1	1	1	0	0	0	0	0	0	0	NA	1	NA	NA	NA	NA	NA	12.8	12.3	9.8	7.3	9.2	645	471	374	205	291	120	60	53	39	55	2.8	2	2.9	2.4
113	2	52	11	0	NA	1	0	0	0	0	0	0	0	1	4	5	0	0	0	0	0	0	0	0	NA	0.187	NA	NA	NA	NA	13.6	11.1	9.7	11.5	11.1	361	283	235	337	497	197	115	97	117	98	4.4	2.6	2.9	3.4
114	1	52	11	0	15	1	0	0	0	0	0	0	1	1	1	2	0	0	0	0	0	0	0	0	NA	65.8	NA	151	98.2	17.3	13.1	10.4	8.1	9.1	10.2	189	145	153	150	200	191	130	105	93	106	4.7	3.2	3.5	2.8
115	1	52	49	0	21	3	1	1	0	0	0	0	0	1	4	5	0	0	1	0	0	0	0	1	1	NA	275	231.06	279	196.14	10.8	6.4	7.9	6.9	8.9	501	309	217	156	518	169	69	82	90	110	3.4	2.8	2.6	2.5
116	2	52	54	0	18	2	0	0	0	1	0	0	1	4	4	5	0	0	0	0	0	0	0	NA	1	NA	186.3	292	263	174.16	12.2	10.4	9.2	10	9.8	200	137	181	156	350	91	43	36	52	45	2.5	1.1	2.3	2.5
117	2	52	30	0	10	1	0	0	1	0	1	0	1	1	1	2	0	0	0	0	0	0	0	NA	1	NA	71.65	180.06	NA	NA	11.5	12.9	10.4	9.2	8.9	280	233	192	121	267	150	136	109	96	111	NA	2.4	2.7	2.8
118	2	52	28	0	11	1	0	0	0	0	0	0	1	1	1	5	0	0	0	0	0	0	0	NA	NA	NA	NA	158.54	123.56	35.47	6.5	9.9	7.7	8.3	10.9	341	329	267	222	393	137	84	77	96	116	3.1	2	2.8	3
119	1	52	56	0	23	1	0	1	0	1	0	1	1	1	2	2	0	0	1	0	0	0	0	0	1	NA	58.74	109.2	91.37	100.72	11.6	15.1	14.4	11.6	10.6	51	123	91	66	85	162	162	86	80	76	2.9	3.3	1.9	2.6
120	2	52	30	0	26	1	0	1	0	0	0	0	0	1	3	3	0	0	0	0	0	0	0	NA	1	12.33	102.28	NA	205.24	39.89	10.9	11.4	8.9	8.5	8.9	248	238	178	125	226	90	43	51	59	69	3.2	3	2.7	2.7
121	2	52	50	0	32	1	0	1	1	0	0	0	0	4	4	6	0	0	1	0	0	0	0	NA	1	188.93	233.83	263.01	232.92	146.1	8.3	7.4	9.5	8.6	7.9	150	110	65	53	140	101	76	43	42	87	2.5	2.5	2.7	2.4
122	1	52	26	0	NA	2	0	0	0	1	0	0	0	1	2	3	0	0	1	0	1	0	0	0	0	58.72	327.05	NA	221.63	NA	14.5	15.1	12.3	12.1	12.1	206	203	191	306	612	159	130	105	115	127	3.1	2.6	2.9	2.8
123	1	53	8	0	NA	1	0	0	0	0	0	0	0	1	3	1	0	0	0	0	0	0	0	0	0	NA	26	NA	NA	NA	14.8	13.7	11.9	12.9	12.1	258	207	207	302	NA	174	147	116	120	123	4.6	3.8	3.1	NA
124	1	53	32	1	NA	2	1	1	0	0	0	1	0	1	3	3	1	1	1	0	1	0	0	NA	1	13.2	9.06	15.8	NA	7.94	9.5	7.4	8.9	8.6	12.2	95	96	68	66	55	121	44	54	70	92	2.2	1.2	3.1	3
125	2	53	15	0	11	1	1	0	0	0	0	0	1	1	3	4	0	0	0	0	0	0	0	NA	NA	4.64	8.59	NA	NA	NA	10.8	12.3	9.5	8.2	11	263	269	220	154	188	163	53	70	58	65	3.4	2.8	2.9	3.4
126	2	53	13	0	NA	2	0	0	0	0	0	0	1	1	1	1	0	0	0	0	0	0	0	0	0	NA	NA	NA	NA	NA	13.2	11.8	10.3	9.7	10.3	292	211	191	159	NA	215	200	106	89	150	3.8	2.9	2.9	2.7
127	1	53	57	1	NA	1	1	1	1	0	1	0	1	1	4	6	0	1	0	1	1	1	0	NA	0	20.8	14.2	20.7	8.43	5.51	8.4	8.6	8.4	8.6	9.8	66	62	80	66	81	47	43	43	39	45	1.4	2	2.5	2.5
128	1	53	6	0	NA	1	0	0	0	0	0	0	0	1	1	1	0	0	0	0	0	0	0	NA	NA	NA	NA	192	NA	NA	15.4	12.2	11.3	10.3	11.6	380	282	271	NA	NA	154	100	95	100	145	4.5	3.1	3	NA
129	1	53	10	0	13	1	0	0	0	0	0	0	0	1	3	3	0	0	0	0	0	0	0	NA	0	1	NA	NA	NA	NA	13.6	15.9	15.9	11.6	10.3	224	169	156	124	188	121	56	66	101	124	3.2	2.1	3.1	2.9
130	1	53	7	0	NA	1	0	0	0	0	0	0	0	1	3	1	0	0	1	0	0	0	0	NA	NA	96.22	137.34	NA	NA	NA	14.7	14.6	13.3	13	13.4	172	144	159	166	200	159	133	124	147	145	4.4	3.3	3	3.2
131	2	53	106	0	23	2	0	1	0	0	0	1	1	3	3	5	0	0	0	0	0	1	0	NA	1	110.83	24.59	66.02	158.48	232.13	8.9	6.4	8	8.2	10.3	83	83	39	23	58	95	43	92	69	67	2.9	1.5	3	2.4
132	1	54	7	0	14	1	0	0	0	0	0	0	0	1	1	2	0	0	0	0	0	0	0	NA	NA	NA	NA	NA	NA	NA	10.3	9.1	8.1	9.9	9	73	70	66	63	NA	115	91	74	89	99	3	2.4	3	3
133	2	54	11	0	28	1	0	0	0	0	0	0	0	1	1	1	0	0	0	0	0	0	0	0	NA	NA	2.75	NA	NA	NA	9.2	9.3	7.7	9	9	59	34	57	50	47	26	20	50	44	80	2.8	2.1	3.6	2.7
134	1	54	12	0	12	2	0	0	1	0	0	0	0	1	4	4	0	0	0	0	0	0	0	0	NA	NA	32.2	32.8	23.6	NA	14.5	12.8	11.4	12.5	12.1	310	339	269	308	580	97	88	90	107	87	3.7	2.8	3	3.1
135	1	54	8	0	NA	1	0	0	0	0	0	0	0	1	1	1	0	0	0	0	0	0	0	NA	NA	NA	11.7	NA	132	NA	14	14	14.1	13.6	13.6	275	246	213	243	NA	189	143	140	136	184	4.2	3.8	3.4	3.4
136	1	54	15	0	29	1	1	1	0	0	0	0	1	1	4	6	0	0	0	0	0	0	0	0	1	NA	173	NA	294	NA	13.7	11.8	10.8	10.9	11.2	228	201	233	196	357	158	83	76	103	139	4.1	2.4	2.9	3.1
137	1	54	30	0	32	1	0	0	1	0	1	0	0	1	4	4	1	0	0	0	0	0	0	NA	0	NA	NA	NA	152	NA	11.4	10.4	10.6	9.7	8.7	150	128	144	145	79	147	123	125	119	39	3.2	2.6	2.6	2.7
138	1	54	9	0	NA	1	0	0	0	0	0	0	0	1	1	1	0	0	0	0	0	0	0	NA	NA	NA	NA	193	NA	NA	15.8	14	14.3	14.8	14.5	382	314	269	357	405	199	144	140	185	179	4.4	3.4	3.5	3.8
139	2	54	83	0	30	1	1	1	1	1	1	0	0	1	4	6	0	0	0	0	0	0	1	NA	1	NA	36.5	123	140	87.2	10.9	12	7.3	7.1	6	266	257	217	235	244	176	171	55	72	95	2.3	2.3	2.9	2.8
140	1	54	61	0	27	1	0	1	1	0	1	0	0	1	4	3	0	0	0	0	0	0	0	NA	1	NA	308	258	225	139	9.9	8.8	11.1	8.7	7.5	231	223	313	235	179	82	68	56	48	74	2.6	2.9	2.6	2.6
141	1	54	31	0	30	1	1	1	1	1	0	0	0	1	4	6	0	0	1	0	0	0	0	0	1	NA	NA	NA	NA	23.8	15.1	13	8.6	7.5	11.3	269	179	99	63	75	218	80	60	98	97	3.5	1.7	2.9	2.8
142	1	54	59	0	9	2	0	0	0	0	0	0	1	1	4	6	0	0	0	0	0	0	0	NA	0	NA	NA	319.41	300.65	282.01	11.8	11.5	11	8.2	7.3	368	280	282	256	403	160	90	77	104	82	3.1	1.9	2.6	3
143	1	54	54	0	13	2	0	0	0	0	0	0	1	4	4	5	0	0	0	0	0	0	0	NA	0	152.09	98.61	64.38	78.24	17.71	9.7	8.7	8.5	8.7	10.6	406	431	437	342	449	30	23	27	38	37	3	2.4	3.2	3.2
144	2	55	13	0	27	1	0	0	0	0	0	0	0	1	3	3	0	0	0	0	0	0	0	NA	1	NA	NA	NA	NA	NA	16	14.8	12	11.2	10.6	442	362	276	258	450	150	127	133	147	132	NA	3	2.7	2.8
145	1	55	74	0	33	3	1	1	0	0	0	0	0	1	2	2	1	1	1	1	1	1	0	0	1	NA	NA	26.9	41.9	21.7	17.5	14.5	11.4	9.9	9.8	255	196	93	60	101	95	91	74	89	99	3.6	1.9	2.9	2.7
146	2	55	14	0	15	2	1	0	0	0	0	0	0	1	3	3	0	0	0	0	0	0	0	0	1	NA	NA	NA	NA	NA	15	14.7	11.9	9.6	10.1	382	303	223	203	428	170	68	88	88	71	4.1	2	3	2.3
147	2	55	18	1	26	1	0	0	0	0	0	0	1	1	1	1	0	0	0	0	1	0	0	0	1	NA	NA	NA	16.2	15	12.1	9.2	8.8	8.5	8.2	148	119	101	73	55	125	69	51	56	42	2.7	1.6	3.1	3.9
148	1	55	5	0	NA	1	0	0	0	0	0	0	0	1	4	4	0	0	0	0	0	0	0	NA	NA	NA	0.183	NA	NA	NA	15	14.5	13.5	12.5	12.5	259	235	242	NA	NA	189	183	150	165	179	4.3	4.2	NA	NA
149	1	55	10	0	15	2	0	0	0	0	0	0	0	1	1	1	0	0	0	0	0	0	0	NA	NA	NA	NA	21.3	17.9	NA	17.1	14.5	13.5	11.6	13.5	254	182	163	169	327	213	111	81	100	136	4.7	3.3	3.1	3.2
150	1	55	13	0	19	1	0	0	0	0	0	0	1	1	1	2	0	0	0	0	0	0	0	0	NA	NA	NA	NA	29.9	27.9	8.9	8	8.4	9	8.9	596	459	316	435	586	183	160	94	107	103	3.9	NA	3.2	2.9
151	1	55	8	0	18	1	0	1	1	0	0	0	0	1	3	3	0	0	1	0	0	0	0	NA	NA	NA	NA	NA	NA	NA	16.1	14	13.1	11.9	12.5	275	203	197	161	249	184	60	64	106	104	4.9	2.2	3.4	3.2
152	1	55	10	0	NA	1	0	0	0	0	0	0	1	1	1	1	0	1	1	0	0	0	0	NA	NA	NA	12.6	NA	187	NA	6.8	9.1	8.5	7.9	8.5	133.1	568	580	429	NA	96	64	49	80	110	3.6	2.9	3.1	2.7
153	1	55	13	0	15	1	0	0	1	0	0	0	1	1	1	1	0	0	0	0	0	0	0	NA	0	NA	NA	NA	234	166	8.9	7.8	8.1	8.5	8	372	183	189	200	300	138	63	53	69	80	2.7	1.8	2.5	2.6
154	1	55	9	0	NA	3	0	0	0	0	0	0	0	1	2	3	0	0	0	0	0	0	0	NA	NA	NA	8.78	NA	NA	NA	12.1	12	11.6	12.5	12.2	268	227	257	294	336	194	206	161	125	86	4	4	3.4	3.6
155	1	55	12	0	15	1	0	0	0	0	0	0	0	1	3	2	0	0	1	0	0	0	0	0	NA	NA	365	166	115.22	111.94	17.3	15.5	8.6	9.3	8.4	199	185	153	231	575	101	52	82	135	140	2.9	1.4	2.9	3
156	1	55	13	0	NA	1	0	0	0	0	0	0	1	4	4	5	0	0	0	0	0	0	0	NA	NA	NA	NA	131.54	47.09	NA	12.3	9.7	8.8	9.2	9.9	158	137	152	195	405	141	91	97	119	184	3.2	2	2.8	3.1
157	2	55	41	0	19	1	0	1	1	0	1	0	1	1	4	6	0	0	0	0	0	0	0	0	NA	NA	267.49	265.64	NA	NA	10.5	10.2	9.3	8.3	8.2	195	208	212	209	403	65	64	51	68	169	2.3	2.7	2.6	2.8
158	1	55	10	0	NA	2	0	0	1	1	0	1	1	1	4	4	0	0	0	0	0	0	0	NA	NA	1	NA	133.91	NA	16.11	12.5	12.3	11.3	10.8	10.6	319	282	263	290	385	212	176	159	160	143	3.5	2.9	2.7	2.7
159	1	56	36	0	28	3	0	0	1	1	0	0	0	4	4	5	0	1	0	0	1	0	0	0	0	12.9	10.9	NA	NA	NA	8.2	7.9	9.2	9.9	10.4	298	300	207	128	163	67	65	51	50	81	2.1	2	2.2	3.6
160	1	56	14	0	NA	1	0	0	0	0	0	1	1	1	4	4	0	0	0	0	0	0	0	NA	NA	NA	NA	NA	NA	NA	13.1	12.4	11.7	11.9	12	202	187	169	245	290	154	115	117	114	109	4	2.9	3.4	3.5
161	2	56	68	1	NA	3	0	0	1	0	0	0	1	1	4	6	0	0	0	0	0	0	0	NA	NA	NA	14.7	27.8	38.9	19.6	4.1	13.5	11.8	10.4	8.8	16	40	35	17	83	95	139	101	71	59	1.9	3.1	2.9	2.8
162	1	56	33	0	NA	1	0	0	0	0	0	0	0	1	4	4	0	0	0	0	0	0	0	0	NA	NA	NA	NA	NA	NA	15.6	14.1	14.4	13	13.3	221	201	209	217	283	226	146	162	179	187	4.5	4.6	3.2	3.4
163	1	56	12	0	NA	1	0	0	0	0	0	0	0	1	3	3	0	0	0	0	0	0	0	NA	NA	NA	NA	NA	NA	NA	15.7	15.2	14.7	10.5	12	255	233	188	130	326	203	149	128	131	133	4	3	3	2.9
164	1	56	15	0	NA	2	0	0	0	0	0	0	1	1	4	5	0	0	0	0	0	0	0	NA	1	19.63	74.65	252.74	169	50.32	8.6	10.6	9.1	8.8	8.5	167	139	139	190	426	105	75	65	80	82	3.2	2.7	2.8	2.8
165	2	56	11	0	NA	1	0	0	0	0	0	0	1	1	4	4	0	0	0	0	0	0	0	NA	NA	NA	NA	121.52	145.77	62.61	12.5	11.8	9.8	9.4	9	274	294	229	215	409	203	173	149	124	155	3.5	3	2.8	2.8
166	2	56	17	0	NA	2	0	0	1	0	0	0	1	4	4	5	0	0	0	0	0	0	0	NA	NA	NA	72.3	299.2	210.92	41.02	13.2	14.3	12.8	12.2	12.7	226	257	257	342	537	136	103	80	94	111	3.6	2.9	2.8	2.7
167	1	56	26	0	NA	1	0	0	0	0	0	0	1	4	4	6	0	1	1	0	1	0	0	NA	0	NA	NA	342.49	159.71	NA	12.4	13.1	12.3	11	12.6	284	304	273	289	514	169	160	148	128	134	3.2	3.3	2.9	2.9
168	1	57	25	0	NA	3	0	0	0	0	0	0	1	1	3	3	0	0	0	0	0	0	0	NA	NA	0.862	NA	NA	3.16	NA	8.6	7.9	9.9	10.7	9.6	204	181	127	99	44	129	110	91	84	82	2.7	2.7	2.8	3.3
169	1	57	11	0	32	1	0	0	0	0	0	0	0	1	3	1	0	0	0	0	0	0	0	NA	NA	NA	NA	NA	NA	NA	15.6	14.7	13.6	13	14.5	263	241	205	232	434	189	122	98	121	144	4.5	3.2	3	3.2
170	1	57	19	1	NA	2	0	0	0	0	0	0	0	1	1	1	0	0	1	0	0	0	0	NA	NA	NA	NA	NA	NA	NA	11.4	10.2	10.8	9.7	10.1	222	196	154	116	143	57	55	54	53	52	2.8	2	2.3	2.6
171	1	57	89	0	30	1	1	1	1	0	0	0	0	1	4	5	0	1	1	1	1	1	0	0	1	NA	NA	NA	20.8	15.9	9.4	10.6	8.7	11.1	8.9	545	266	154	79	126	127	46	40	41	48	2.8	1.3	2.5	2.7
172	1	57	6	0	NA	1	0	0	0	0	0	0	0	1	1	1	0	0	0	0	0	0	0	NA	NA	NA	NA	NA	NA	NA	15.8	12.8	12.4	11.5	12.1	358	312	311	301	320	166	117	103	114	107	4.3	3.2	3.2	3.4
173	1	57	42	0	NA	1	0	0	0	0	0	0	1	1	3	1	0	0	1	0	0	0	0	NA	NA	NA	NA	136	103	79.7	11.1	12.8	11.2	10.7	9.6	132	173	134	131	200	129	123	141	133	115	3.5	3.1	3.2	3.1
174	1	57	7	0	NA	3	0	0	0	0	0	0	1	1	4	4	0	0	0	0	0	0	0	NA	1	NA	NA	36.04	209.2	NA	14.7	13.8	13.1	12.1	13.3	337	276	259	204	303	186	147	130	150	160	4.7	3.9	3.6	NA
175	1	57	47	1	24	1	1	1	0	0	0	0	1	1	3	1	1	1	1	0	1	1	1	NA	1	NA	7.44	27.93	NA	173.92	10.8	10	7.7	6.8	8.2	75	69	43	164	58	118	78	75	89	70	3.2	2.1	3.2	3.1
176	1	57	18	0	14	1	0	0	0	0	0	0	0	1	4	6	0	0	1	0	0	0	0	0	0	2.38	52.5	NA	NA	122.32	13.5	13.5	12.1	10.7	11.4	226	228	204	223	326	229	180	151	203	229	4.3	3.7	3.6	3.2
177	2	57	199	0	12	1	0	1	0	1	0	0	1	1	2	1	1	1	1	1	1	0	0	NA	1	363.16	276.61	315.92	138.21	117.3	12.2	9.5	8.4	10.2	9.5	81	42	52	84	243	70	40	48	68	61	3.4	2.6	2.8	2.9
178	1	58	75	0	NA	3	0	0	0	0	0	0	0	1	1	1	0	0	1	0	1	0	0	0	1	NA	31.4	NA	NA	NA	15.6	13.1	11	11.1	11.3	240	159	120	70	63	103	65	60	66	56	3.2	2.4	3	3.4
179	2	58	40	0	19	3	0	0	0	0	0	0	1	1	3	3	0	1	1	0	0	0	1	0	NA	20.4	17.5	NA	NA	11.3	8.8	9.1	9.2	9.8	9.7	525	590	572	337	413	103	102	80	63	67	2.9	2.6	2.4	2.7
180	1	58	10	0	NA	2	0	0	1	0	0	0	1	1	1	1	0	0	0	0	0	0	0	NA	NA	NA	NA	NA	NA	NA	16.7	13.3	13.7	14	13.3	291	210	214	224	339	172	85	89	92	82	4.2	3.3	3.2	3.3
181	1	58	16	0	16	3	1	1	0	0	0	0	1	1	4	3	0	1	0	0	0	0	0	0	1	NA	NA	73.1	220	98.4	12.7	10.2	9.6	7.2	7.6	232	199	114	74	75	93	44	24	39	44	2.9	3.1	2.9	2.8
182	1	58	12	0	14	1	0	0	0	0	0	0	1	1	2	1	0	0	0	0	0	0	0	NA	1	NA	NA	NA	NA	57.23	11.1	10.7	10.9	12.2	9.6	109	96	78	102	101	181	154	130	165	130	3.4	2.9	2.7	3.5
183	1	58	20	0	12	1	0	1	1	0	1	0	0	1	3	1	0	0	0	0	0	1	0	0	0	NA	NA	NA	337.41	NA	12.5	11.3	11.2	12.1	10	145	171	189	319	481	62	51	49	82	106	2.5	2.1	2.6	2.6
184	1	58	89	0	NA	2	0	0	0	0	0	0	0	1	3	5	0	0	1	0	0	1	0	0	1	NA	NA	107.95	192.04	220.33	9.7	9.6	8.8	10.5	9.8	464	552	546	564	540	60	56	55	73	53	3	2	2.8	3
185	2	59	17	0	NA	1	0	0	0	0	0	0	1	1	1	1	0	0	0	0	0	0	0	NA	1	NA	NA	NA	NA	NA	11.9	11.1	8.8	9.2	9.3	199	167	132	116	102	174	130	89	77	66	3.1	2.4	2.8	3.3
186	1	59	19	0	14	3	0	0	0	0	0	0	1	1	4	6	0	0	0	0	0	0	0	NA	NA	NA	NA	274	261	NA	12.7	9.2	6.7	9.1	9.1	174	104	79	109	NA	235	111	84	88	95	3.4	1.9	3.1	3.2
187	1	59	13	1	29	1	1	1	0	1	0	0	0	1	3	3	0	0	0	0	1	0	1	NA	NA	NA	NA	NA	240	128	8.4	8.2	9.3	8.4	8.8	245	139	147	46	94	81	48	54	54	58	2.3	2.9	2.8	3
188	2	59	61	0	NA	1	0	0	1	1	0	0	1	1	1	2	0	1	0	1	1	1	0	NA	1	NA	11.9	NA	NA	NA	9	11.2	9.8	9	8.2	40	41	27	16	26	138	107	95	60	58	2.9	2.6	2.4	2.7
189	1	59	6	0	NA	1	0	0	0	0	0	0	0	1	1	1	0	0	0	0	0	0	0	NA	NA	NA	37.48	NA	NA	NA	16.3	14.8	13.5	12.7	13	201	169	176	176	NA	224	185	140	161	180	4.3	3.7	4	3.4
190	1	59	24	0	NA	2	0	0	1	1	0	0	1	4	4	5	1	1	0	0	0	0	0	NA	1	170.1	NA	NA	140.02	133.64	12.5	10.5	9.9	9.7	10.5	349	266	247	333	510	103	80	76	94	90	2.8	2	2.4	2.7
191	2	60	85	0	NA	3	0	1	1	0	1	1	0	4	4	6	0	0	0	0	1	0	0	NA	NA	24.7	12.3	9.99	18.1	4.42	10.4	10.2	10.3	9.1	8.5	197	218	176	150	155	90	64	48	66	72	1.8	1.3	1.3	2
192	1	60	38	0	34	1	0	1	0	0	0	0	1	1	3	3	1	1	0	0	1	0	0	0	NA	NA	2.33	NA	NA	NA	10.1	10.3	11.2	9	14	428	266	114	37	62	146	43	50	58	60	3.3	1.4	3.3	3.4
193	1	60	12	0	NA	1	0	0	0	0	0	0	1	1	3	3	0	0	0	0	0	0	0	NA	0	NA	NA	NA	NA	NA	12.7	12.2	12	8.9	11.3	187	186	157	123	331	76	48	62	60	64	3	1.7	2.2	2.4
194	1	60	14	0	22	1	1	1	1	1	0	0	1	1	4	6	0	0	0	0	0	1	0	1	0	NA	13.8	14.4	NA	NA	9.1	10.3	9.7	8.2	10.7	240	231	260	253	235	92	48	49	61	56	3.1	1.8	3	2.7
195	1	60	38	0	30	1	0	1	0	0	0	0	0	1	2	1	1	1	1	0	0	0	0	NA	1	NA	24.4	NA	NA	NA	9.5	10.5	8.1	10.4	9.5	372	329	286	255	395	66	47	39	50	67	2	1.7	2.6	2.8
196	1	60	10	0	9	2	1	0	0	0	0	0	1	1	4	6	0	0	0	0	0	0	0	0	NA	331	254	255	219	NA	11	10.9	9	9.2	9.8	389	383	338	381	734	141	95	85	110	137	3.6	2.2	2.7	2.9
197	1	60	10	0	NA	1	0	0	0	0	0	0	0	1	1	1	0	0	0	0	0	0	0	0	0	NA	NA	NA	NA	NA	13	12.1	11.1	11.4	11.6	295	235	216	270	250	134	116	96	131	96	4.4	3.8	3.4	3.9
198	1	60	19	0	36	1	0	0	0	0	0	0	1	1	3	3	0	0	0	0	0	0	0	NA	NA	NA	NA	263.49	NA	103.91	10.5	9.3	7	8	8.3	294	198	194	244	524	111	52	58	62	71	4.1	2.5	2.8	2.6
199	1	60	16	0	19	2	1	1	1	1	0	1	1	1	4	6	0	1	1	0	0	0	1	1	NA	96.38	91.7	NA	234.68	91.69	10.4	9.4	8.2	9.1	8.9	373	254	227	177	162	118	47	47	53	58	3.8	1.7	2.7	2.5
200	2	60	18	0	NA	1	0	1	1	0	0	0	1	4	4	5	0	0	0	0	1	0	0	NA	NA	115.52	NA	212.95	154.04	92.94	10.9	10.5	8.9	8.8	8.7	183	221	229	220	334	125	48	47	58	85	3.5	2	3.2	3.1
201	1	60	39	0	NA	2	1	0	0	0	0	0	1	1	4	5	0	0	0	0	0	0	0	NA	NA	38.63	97.67	111.92	31.77	9.55	10.9	8.9	9.5	9.7	10.2	466	428	469	526	554	99	69	86	96	131	2.9	2.5	2.8	2.9
202	1	61	72	0	NA	1	0	0	0	0	0	0	1	1	1	2	0	0	1	0	1	0	1	0	1	NA	NA	7.61	7.6	NA	14.5	10.9	8.7	12.6	11.1	310	163	113	104	140	171	67	51	48	36	3.5	1.9	2.5	2.9
203	1	61	17	0	17	1	1	0	0	0	0	0	0	1	3	3	0	0	1	0	1	0	1	0	1	NA	27.5	31.2	14.9	21.2	12.6	11.8	9.6	10.1	9.2	382	330	288	304	389	106	75	59	95	107	3.4	2.6	2.6	3.4
204	2	61	23	0	9	1	0	0	0	0	0	0	0	1	3	1	0	0	1	0	0	0	0	0	1	NA	20.8	21.9	11.2	1.6	12.9	12.2	10.3	12.4	12.5	182	185	151	156	275	140	63	80	118	145	3.4	2.4	3.1	3.4
205	1	61	19	0	14	1	1	0	1	0	0	0	0	1	3	5	0	0	0	0	1	0	0	0	0	NA	26.2	NA	10.3	12.6	11.9	8.8	8.1	8.8	9.2	449	260	198	226	289	59	36	59	67	41	2.3	2	2.8	2.5
206	1	61	12	0	19	1	0	0	0	1	0	0	1	1	1	1	0	0	0	0	0	0	0	NA	NA	NA	NA	25.4	20.3	10.1	9.5	8.4	8.3	7.7	7.1	137	109	98	59	124	146	90	82	96	95	3.6	2.4	3.1	2.5
207	2	61	8	0	NA	1	0	0	0	0	0	0	1	1	4	4	0	0	0	0	0	0	0	0	NA	142	175	243	157	18.2	11.4	11	8.6	8.2	8.6	307	295	263	282	491	174	139	118	95	80	3.8	2.7	2.9	2.9
208	1	61	9	0	31	1	0	0	1	0	0	0	1	1	2	2	0	0	0	0	0	0	0	0	NA	NA	NA	NA	NA	NA	12.3	9.5	7.9	9.4	10	91	78	101	132	127	164	89	108	124	128	4.1	2.4	3.2	3.4
209	1	61	13	0	NA	2	0	0	1	0	0	0	1	1	3	3	0	0	1	0	0	0	0	0	0	NA	NA	NA	331	NA	13.6	12.4	11.2	10.3	9.7	264	201	192	220	325	142	72	79	87	74	4.6	2.5	2.6	3.1
210	1	61	7	0	NA	1	0	0	0	0	0	0	0	1	1	2	0	0	0	0	0	0	0	1	1	4.26	NA	NA	NA	NA	10.4	10	8.6	8.7	9.9	200	196	155	164	NA	149	113	84	95	130	4.4	3.6	3.3	3.6
211	2	61	29	0	NA	2	0	0	1	0	0	0	0	1	3	3	0	0	1	0	0	0	0	NA	NA	148	NA	NA	91.7	NA	14.4	12.1	11	10.3	10.7	307	231	227	228	344	107	80	73	61	92	3.5	2.5	2.3	2.6
212	2	61	20	0	NA	1	1	0	0	0	0	0	1	1	4	6	0	0	0	0	0	0	0	NA	1	NA	258.78	298.76	259.49	NA	12.9	11.6	8.7	10.6	9.8	178	212	175	95	95	115	97	80	85	96	2.6	1.6	2.5	2.5
213	1	62	71	0	18	2	1	0	0	0	0	0	0	1	1	1	0	0	1	0	1	0	0	0	1	0.406	NA	NA	NA	NA	13.1	12	11.7	11	11.9	125	66	64	61	105	133	111	89	75	47	2.7	2.5	2.9	2.5
214	2	62	25	0	25	2	1	0	0	0	0	0	1	1	4	4	0	0	0	0	0	0	0	1	1	NA	39.7	NA	NA	NA	12.4	10.1	8	8.1	8.3	139	103	79	75	360	94	69	60	60	70	3.1	2.2	2.8	2.3
215	2	62	53	0	NA	2	0	0	0	0	0	0	1	1	3	3	1	1	1	0	0	0	1	NA	1	22.4	21.1	23.6	25.3	13.3	12.4	12.1	8.5	11.4	11.7	117	85	64	85	243	83	52	41	65	86	2.5	2.1	3.1	2.9
216	1	62	12	0	20	1	0	0	1	0	0	0	1	1	4	4	0	0	0	0	0	0	0	0	0	NA	107	NA	NA	NA	13.7	12.3	10	11.8	12	331	266	212	269	NA	236	159	124	186	200	4.7	3.2	2.7	3.6
217	1	62	13	0	20	1	0	0	0	0	0	0	1	1	1	2	0	0	0	0	0	0	0	0	0	4.62	119.7	NA	NA	58.45	11.4	11.7	10.9	8.3	7.4	545	562	434	241	392	156	85	74	94	114	3.4	2.1	2.9	2.2
218	1	62	21	0	NA	2	0	0	0	0	0	0	1	4	4	5	0	0	0	0	0	0	0	NA	0	16.86	136	155.5	124	26.89	12.6	13.4	9.9	10.2	11.1	311	274	236	234	295	120	61	66	85	95	3	1.9	2.7	2.6
219	2	62	40	0	15	3	0	1	0	0	0	0	1	1	4	6	0	0	0	0	0	0	0	NA	NA	NA	224.21	238.77	164.87	NA	8.6	10.3	9.8	8.9	9.5	540	496	401	325	425	49	32	43	56	97	2.1	1.6	2.3	2.8
220	1	62	30	0	NA	2	0	0	1	0	0	0	1	4	4	5	0	1	0	0	0	0	0	NA	1	139.54	139.68	95.93	101.89	NA	11	11.9	11.2	10.6	10.5	431	542	534	490	451	74	83	74	80	60	2.5	2.4	2.8	2.7
221	1	63	7	0	NA	1	0	0	0	0	0	0	0	1	3	1	0	0	0	0	0	0	0	NA	NA	NA	NA	NA	NA	NA		13.7	12.3	12.2	12.9	NA	147	140	141	187	165	138	128	115	130	NA	4	3.5	NA
222	1	63	12	0	NA	1	0	0	0	0	0	0	1	1	4	4	0	0	0	0	0	0	0	NA	NA	NA	NA	NA	NA	0.774	13	12	12.7	13	13.4	298	260	270	NA	332	157	100	129	119	117	3.9	2.5	3.4	NA
223	1	63	25	0	NA	1	0	1	0	0	0	0	0	1	3	1	0	0	0	0	1	0	0	NA	1	NA	12.1	NA	NA	NA	7.8	9.9	7.7	9.1	9.3	119	173	150	167	137	93	55	37	37	65	2.5	2.4	2.7	3.1
224	1	63	25	0	13	2	0	1	0	0	0	0	1	1	1	1	0	0	0	0	0	0	0	NA	1	NA	11.3	NA	NA	NA	11.2	10.6	8.9	9.1	9.7	436	376	292	177	167	62	33	22	52	95	2.5	2	2.7	2.4
225	1	63	36	0	23	1	0	1	0	0	0	0	1	1	3	5	0	1	1	0	0	0	0	0	1	NA	99.2	206	370	200	13.6	14.6	12.1	10.4	10.3	333	321	166	69	217	99	55	36	55	62	3.6	2.4	3	2.9
226	1	63	10	0	22	1	0	1	0	0	0	0	1	1	1	1	0	0	0	0	0	0	0	0	NA	NA	58.41	NA	NA	NA	15	12.1	12	12.5	11.4	353	289	259	332	542	123	100	86	141	126	3.3	2.8	2.9	2.9
227	1	63	35	0	17	1	0	0	1	0	0	0	1	1	2	1	0	0	1	0	0	0	0	0	NA	124.21	190.56	NA	286.27	NA	10.1	14.3	10.8	8.4	8.9	309	378	286	234	371	102	45	80	89	104	3.3	1.9	2.7	2.5
228	1	63	8	0	NA	1	0	0	0	0	0	0	0	1	2	1	0	0	0	0	0	0	0	NA	NA	NA	43.55	NA	NA	NA	13.9	13.1	13.2	12.6	12.6	294	266	274	268	324	168	150	142	132	133	4.4	4.1	4	3.5
229	2	63	13	0	NA	1	0	0	0	0	0	0	1	3	4	4	0	0	0	0	0	0	0	NA	0	94.9	126	122	60.57	25.45	10.2	11.5	9.2	11.6	12.3	225	220	152	202	305	136	98	89	95	131	3.1	2.6	2.8	2.9
230	2	64	22	0	NA	3	0	0	0	0	0	0	1	4	4	1	0	0	0	0	0	0	0	NA	1	14.3	NA	11.8	NA	NA	10.5	12.7	9.5	9.7	11.5	213	260	204	267	517	69	43	45	51	67	2.7	2.1	2.9	3
231	1	64	16	0	NA	1	1	0	1	0	0	0	1	1	1	2	0	0	1	0	0	0	0	NA	0	NA	NA	9.48	NA	NA	11.7	12.7	9.8	11.8	12.9	145	107	100	100	169	146	110	51	60	96	3.2	NA	1.6	2.8
232	1	64	22	0	32	1	0	0	1	0	0	0	1	1	2	1	0	0	0	0	0	0	0	NA	1	NA	NA	NA	NA	NA	12	11.4	10.6	12.2	10.8	139	108	89	93	111	147	117	121	127	96	3.9	3.2	3	3.3
233	1	64	49	0	NA	1	1	0	0	0	1	1	1	1	3	3	0	0	0	0	0	0	0	NA	NA	NA	NA	168	149	78.8	7.8	7.8	9.6	9.4	8.9	187	159	153	205	311	59	38	60	107	139	2.6	2.8	3.1	2.9
234	1	64	19	0	33	3	1	1	1	0	1	0	0	1	4	4	0	0	1	0	0	1	0	0	0	89.2	290	406	418	74.1	11.2	12	10.4	9.5	10.2	203	112	99	73	174	130	58	75	83	113	3.7	3.1	2.9	2.9
235	2	64	26	0	NA	1	1	1	0	0	0	0	1	1	4	5	0	0	1	0	1	0	0	NA	NA	NA	NA	90.54	190	73.63	9.9	12.9	10.4	8.5	8.7	406	462	217	156	284	185	49	69	56	78	3.8	1.2	2.4	2.6
236	1	64	14	0	NA	2	0	0	1	1	1	0	0	1	4	4	0	0	0	0	1	0	0	0	NA	65.38	53.07	158.81	73.31	19.82	12.8	8.2	8.8	12	13.3	305	383	189	169	185	123	67	59	74	69	3.6	2	3	2.9
237	2	65	26	0	NA	2	0	0	1	0	0	1	1	1	4	4	0	0	0	0	0	0	0	0	0	NA	16.7	25.1	NA	NA	9.4	9.3	8.2	10.2	9.9	344	261	252	244	250	193	123	93	110	102	2.9	2	2.7	3.4
238	1	65	16	0	NA	1	0	0	0	0	0	0	1	1	4	4	0	0	0	0	0	0	0	NA	NA	NA	NA	NA	NA	7.77	14	14	11.7	9.8	12.5	273	225	225	172	432	145	83	56	65	72	4.2	2.6	3.2	3.3
239	1	65	19	0	NA	1	0	0	0	0	0	0	1	1	3	1	0	1	0	0	1	0	0	NA	NA	NA	NA	NA	NA	NA	9	10.4	10.4	10.8	10.5	194	148	130	221	299	115	107	108	146	140	2.8	2.4	2.5	2.9
240	1	65	49	0	31	2	0	0	0	0	0	0	0	1	4	6	0	1	1	0	1	0	1	0	0	NA	NA	NA	NA	NA	11.6	10.8	10.1	10.1	10.6	192	176	178	187	302	104	62	69	81	88	3.6	2.7	2.6	3
241	2	65	10	0	26	3	0	0	0	0	0	0	1	1	4	4	0	0	0	0	0	0	0	0	1	NA	NA	5.17	2.12	2.58	10.6	8.2	9.4	9	10.2	140	163	126	125	296	124	90	81	89	100	3.5	2.5	3.3	3.2
242	1	65	79	0	30	1	0	1	1	0	0	1	0	1	1	2	0	0	0	0	0	0	0	0	NA	51	53.9	22.6	NA	18.7	16.8	13.3	13.5	11.8	12.6	190	137	154	152	206	180	132	127	114	110	3.9	2.7	3.3	3.2
243	1	65	37	0	17	2	0	0	0	1	0	0	0	4	4	5	0	0	0	0	0	1	0	1	1	10.1	6.8	205	241	128	16.5	15.6	12.6	12.4	13.4	390	364	255	186	212	156	82	48	57	77	3.9	2.3	3.6	3.1
244	1	65	10	0	NA	1	0	0	1	1	0	0	1	1	1	2	0	0	0	0	0	0	0	NA	NA	NA	1	68.58	56.75	20.23	16.1	15.2	15	13.2	14.1	218	176	176	199	216	192	161	147	122	131	4.4	3.8	3.6	3.2
245	1	65	11	0	NA	1	0	0	1	1	0	0	0	1	2	1	0	0	0	0	0	0	0	0	0	2.46	NA	135.22	120.4	32.34	6.2	6.5	7.2	7.9	8.6	269	181	184	255	380	83	75	71	96	88	3.5	2.9	2.7	2.8
246	2	65	17	0	16	2	0	0	0	0	0	0	1	1	1	1	0	0	0	0	0	0	0	NA	0	NA	NA	NA	NA	NA	13.6	11	10.2	11.4	11	481	353	330	323	NA	194	118	89	93	110	3.9	2.6	2.8	3.5
247	2	65	11	0	24	2	0	1	1	1	0	0	1	1	4	5	0	1	0	1	1	1	0	NA	1	140.73	NA	239.89	104.14	46.96	8.5	8.3	11	12	13	290	267	212	150	367	120	65	78	87	69	2.3	2.2	3.2	2.9
248	2	65	17	0	23	2	0	0	0	0	0	0	1	1	3	3	0	0	0	0	0	0	1	0	NA	NA	3.04	125.11	NA	41.71	15.1	13.5	14.2	9.8	11.5	212	164	209	107	240	142	43	55	55	88	4.7	1.8	3.6	2.9
249	1	65	21	0	NA	2	0	0	1	1	0	0	0	4	4	4	0	0	0	0	0	0	0	NA	NA	NA	NA	NA	66.76	18.55	12.3	12.5	11.3	12	12.3	170	176	201	311	442	102	106	101	115	161	3	2.8	2.9	3
250	2	65	12	0	NA	1	0	0	0	0	0	0	1	1	4	5	0	0	0	0	0	0	0	0	1	NA	22.22	45.16	228.45	90.94	12.5	12	11.8	9.8	12.9	189	312	243	260	420	175	159	95	91	167	3.8	3.6	2.7	2.9
251	1	66	20	0	17	1	0	0	0	0	0	0	1	1	1	2	1	0	0	0	1	0	1	0	NA	NA	NA	NA	179	92	13.1	10.1	8.6	10.1	10.5	706	602	457	328	558	187	112	99	88	120	3.9	2.6	3	3
252	2	66	12	0	NA	1	0	0	1	0	0	0	1	1	4	4	0	0	0	0	0	0	0	0	1	NA	258	NA	NA	NA	12	11.3	12.7	9	11.2	NA	276	346	256	417	175	168	139	87	96	NA	4.1	3	3
253	2	66	14	0	NA	3	1	0	1	0	0	0	1	4	4	6	0	0	1	0	0	1	0	NA	0	180	NA	NA	NA	32.6	10.1	9.5	9.4	10.7	11.6	401	329	360	359	495	75	49	47	74	121	2.7	3.2	3.1	3.2
254	1	66	16	0	19	2	1	0	1	0	1	1	0	1	4	5	0	0	1	0	0	1	0	NA	NA	NA	186	159	89.8	NA	12.1	9.6	8	7.6	8.2	117	100	94	88	253	110	73	71	77	59	3.3	2.3	3.4	3.1
255	1	66	28	0	20	1	1	1	0	0	0	0	1	1	4	6	0	0	1	0	1	1	0	0	NA	89.1	146	384	179	121	12.5	10.9	10.2	8.7	8.4	251	223	162	85	156	104	46	45	50	72	3.1	1.9	3	2.5
256	2	66	20	0	NA	3	0	0	1	0	0	0	1	1	4	4	0	0	0	0	1	0	1	0	NA	280.35	135.55	150.21	193.06	19.21	9.5	9.9	8.4	9.9	10.6	118	95	86	98	174	121	65	63	106	161	2.6	1.5	1.9	2.6
257	1	66	12	0	13	2	0	0	1	0	0	0	1	3	4	6	0	0	0	0	0	0	1	0	1	NA	257.07	NA	233.9	82.73	13.3	10.9	9.7	9	9.1	251	234	257	369	489	131	75	72	110	148	3.4	1.9	2.4	3.1
258	2	66	75	0	NA	1	0	0	0	0	0	0	1	1	4	5	0	0	0	0	1	1	1	NA	1	107	152.01	149.1	16.97	98.06	9.2	8.4	8.6	7.8	11.2	256	250	247	159	134	115	104	108	97	93	2.4	2.5	2.5	3.1
259	1	66	19	1	15	1	0	0	0	0	0	1	1	2	4	6	0	1	0	1	1	0	0	0	1	47.23	170.4	300.5	228.79	233.17	11.7	14.7	12.1	8.7	10.4	153	94	74	45	52	267	136	100	56	51	3.6	2.2	2.7	2.3
260	2	67	16	0	NA	1	0	0	1	0	0	0	1	1	4	4	0	0	0	0	0	0	1	NA	NA	NA	NA	11.3	NA	NA	11.1	10.5	7.9	8.9	8.4	347	290	217	276	293	149	72	39	85	86	3.2	1.8	2.9	3
261	1	67	41	0	19	1	0	0	0	0	0	0	0	1	1	2	0	0	0	0	0	1	0	NA	1	3.33	NA	NA	19.7	NA	17.8	19.5	10.9	11.8	13.2	384	371	203	197	348	98	67	47	65	60	3.7	3	3.3	2.7
262	2	67	16	0	15	1	0	0	1	0	0	0	0	1	4	4	0	0	0	0	0	0	1	0	1	NA	NA	NA	NA	NA	12.6	12.9	10.7	9.9	11.3	314	341	293	324	566	152	142	105	97	122	4	3.5	3.3	3.1
263	1	67	31	0	31	1	0	1	1	0	0	0	1	1	2	1	0	0	0	0	1	1	1	NA	1	NA	56.8	NA	51.1	25.5	12.1	11.6	10.2	9.5	10.1	147	87	105	69	70	72	33	33	54	74	3.4	2.2	3	3.5
264	1	67	9	0	NA	2	0	0	1	0	0	0	1	1	1	2	0	0	0	0	0	0	0	NA	NA	NA	NA	261	131	75.6	11.8	9.8	10.3	9.5	9.8	347	260	286	310	439	117	72	74	118	118	3.9	2.6	2.6	3.2
265	1	67	10	0	21	3	1	1	0	1	0	0	0	1	1	1	0	0	0	0	1	1	1	0	0	NA	NA	139.44	220.81	96.46	9	8.3	7.3	8.9	9.7	366	283	298	280	392	87	69	53	82	89	3.3	2.9	2.7	2.9
266	1	67	52	0	19	1	1	1	1	1	0	0	0	1	1	2	0	0	0	0	0	1	0	0	1	NA	5.24	84.66	55.6	160.43	10.1	10.4	10.4	10	9.5	78	93	88	101	109	96	58	67	60	71	4.1	3	3.6	3.4
267	2	67	14	0	17	1	1	0	0	0	0	0	1	1	4	6	0	1	1	1	0	0	0	0	NA	151.7	107.68	NA	NA	NA	12	9.9	7.2	8.3	8.7	434	310	248	211	210	202	94	93	99	179	3	1.8	2.5	2.7
268	2	68	12	0	25	2	0	1	1	0	1	0	1	1	2	1	0	0	0	0	0	1	0	NA	NA	NA	NA	1.52	NA	NA	11	8.6	8.5	10.5	10.3	244	189	218	273	254	159	109	82	102	72	3.6	2.6	2.9	3.1
269	1	68	91	0	31	2	0	0	0	0	0	0	0	1	4	1	0	0	1	0	1	0	0	0	1	NA	NA	NA	NA	NA	14.4	14.1	13.2	13.3	13.9	212	215	186	249	492	118	48	59	62	68	3.4	3.2	2.9	3.3
270	2	68	85	0	NA	1	0	0	1	0	0	0	0	1	4	4	0	0	0	0	0	0	0	NA	0	3.52	NA	NA	NA	NA	12.1	11.2	11.6	11.1	11.4	321	341	354	363	423	180	183	166	152	159	4.3	3.3	3.2	3.1
271	2	68	10	0	17	1	0	0	1	0	0	0	0	1	3	3	0	0	0	0	0	0	0	0	NA	NA	30.8	252	268	NA	12.3	11	10.7	11	11	516	485	463	554	NA	150	110	113	135	138	4.1	3.2	3	3.4
272	1	68	18	0	17	4	0	0	0	0	0	1	1	1	3	5	0	0	1	0	1	0	0	NA	NA	NA	NA	NA	NA	NA	9.8	10.3	10.1	9.1	10	238	176	160	177	NA	111	69	70	60	75	3.1	1.9	2.5	2.7
273	1	68	13	1	23	1	0	1	0	0	0	0	1	1	4	5	0	0	0	0	1	1	1	1	1	49.5	52.7	74.6	198	98.7	13.2	7.9	10.1	8	7.4	282	90	99	30	28	106	33	29	34	34	2.7	2	2.4	2.8
274	1	68	45	1	NA	4	0	0	0	0	0	0	1	4	4	4	0	1	0	1	1	0	1	1	1	8.14	NA	199	225.06	257.92	12.2	8.9	9.3	9.5	7.9	442	229	233	293	166	90	61	68	71	59	1.9	3	3	2.9
275	1	68	27	0	21	1	0	1	0	0	0	0	1	1	1	1	0	0	0	0	1	0	1	0	NA	NA	NA	NA	NA	NA	11.2	10.7	8.4	9.8	8.6	256	182	162	134	124	169	95	90	151	152	2.7	2.2	2.6	2.5
276	1	68	48	0	NA	1	1	0	0	0	0	0	1	1	4	6	0	0	0	0	0	0	0	1	0	NA	NA	NA	170.44	NA	10.9	9	7.8	7.6	8	149	90	63	56	NA	98	63	58	64	72	3.1	2.5	2.4	2.7
277	2	68	18	0	NA	2	0	0	1	0	0	0	1	4	4	5	0	0	0	0	0	0	0	0	0	51.08	119.83	NA	92.51	52.94	10	11.8	9.6	10.3	10.9	236	245	259	346	436	140	111	100	105	110	3.1	2.6	NA	2.5
278	2	69	18	0	NA	1	0	0	0	0	0	0	0	1	1	1	0	0	0	0	1	1	1	1	1	NA	102.65	NA	NA	NA	9.6	8.9	7.6	8.5	9.1	139	107	81	111	137	86	65	52	64	81	2.1	1.4	2.4	2.7
279	1	69	12	0	19	1	0	1	0	0	0	1	0	1	1	1	0	0	1	0	1	0	0	0	NA	61.24	NA	413	478	72.49	12.8	9.3	9.1	9.4	11	245	150	127	74	176	191	44	75	103	174	3.1	3.1	2.8	2.6
280	2	69	27	1	34	1	1	1	0	1	0	0	1	1	4	5	0	0	0	0	1	1	1	1	1	221.21	NA	NA	NA	NA	11.9	12.3	9.8	11.4	9.6	289	139	120	68	30	86	39	44	45	60	2.1	1.8	3	3.3
281	1	69	22	0	24	1	0	1	0	0	0	1	1	4	3	3	0	0	0	0	1	0	0	0	1	225.27	236.5	239.74	184.13	65.94	12.5	14.6	12.2	11.1	10.3	239	313	271	403	679	117	87	66	83	106	3.1	2.3	2.4	2.7
282	1	70	49	0	NA	3	0	1	0	1	0	0	1	2	3	3	0	0	1	0	1	0	0	0	1	NA	NA	190.69	82.37	26.22	10.3	8.3	7.9	8.3	8.1	245	212	164	172	341	51	35	44	42	65	2.3	2.7	3.1	3.2
283	2	70	10	0	15	1	1	0	1	0	0	0	0	1	4	4	0	0	0	0	0	0	0	NA	NA	442	339	NA	NA	20.3	12.8	11.9	11.4	12.5	11.8	195	179	166	214	373	161	154	153	171	150	3.7	3.1	3.1	3.4
284	1	70	19	0	17	1	0	0	0	0	0	0	1	1	3	3	0	0	1	0	0	1	0	0	1	NA	49.9	166	67.1	34.6	13.6	13.8	10.9	10.3	10.2	417	353	257	217	539	95	79	75	70	66	4.4	2.6	3	3.5
285	1	70	22	0	NA	1	0	0	1	0	0	0	1	1	1	1	0	0	0	0	1	0	0	0	0	86.37	174	NA	NA	NA	11.1	9.6	8.3	9.4	9.9	138	100	105	161	191	118	106	119	147	173	2.7	2.4	2.6	3.2
286	1	70	43	0	NA	1	0	0	0	1	0	0	1	1	1	1	0	1	0	0	1	0	1	1	NA	NA	272.37	NA	230.51	139.82	10.8	10.7	10.8	10.2	10.5	553	323	332	292	NA	214	115	105	114	160	3.7	2.1	2.5	2.4
287	2	71	42	0	NA	1	0	0	0	1	0	0	1	1	4	6	0	0	0	0	1	0	1	0	1	19.5	25	30	NA	5.08	7.9	7.9	10.6	10	10.8	224	277	242	313	589	130	74	64	48	62	2.8	2.1	3.2	2.6
288	1	71	17	0	16	3	0	0	0	1	0	0	0	4	4	6	0	0	0	0	1	0	0	NA	0	NA	NA	NA	NA	NA	12.8	12	10.6	11.4	11.5	138	123	112	145	205	105	92	76	72	64	3.1	3.1	3.1	2.9
289	1	71	8	0	15	1	0	0	1	1	0	0	1	1	4	6	0	0	0	0	0	0	0	0	1	20.9	15	19.4	NA	3.11	12.7	12	12.4	12	13.4	251	284	311	NA	426	89	73	61	70	72	3.3	2.5	2.9	NA
290	1	71	9	0	NA	2	0	0	1	0	0	0	1	1	4	6	0	0	0	0	0	0	0	1	NA	230.49	NA	NA	NA	NA	13.6	13.9	11.8	11.6	11.4	253	242	344	412	637	155	101	90	83	89	3.7	2.4	2.9	3
291	1	71	30	0	13	3	0	0	1	0	0	0	1	1	4	6	0	0	1	0	1	1	1	0	1	NA	137.96	NA	NA	NA	13.6	9.7	7.3	10.2	10.2	213	153	148	165	246	138	62	62	70	74	2.9	3.4	2.5	2.7
292	1	71	24	0	NA	2	0	0	1	0	0	0	0	1	4	4	0	0	1	0	0	1	0	NA	NA	NA	NA	NA	NA	120.58	9	8.8	9.8	9.2	8.4	234	205	229	284	411	134	108	113	108	120	2.8	2.6	2.8	2.8
293	1	71	8	0	NA	1	0	0	1	0	0	0	1	1	1	2	0	0	0	0	0	1	0	NA	NA	2.37	101.6	190.29	143.86	102.94	14.1	12.1	10.6	9.3	10.4	223	147	138	139	258	205	82	63	96	142	3.9	2.2	3.1	2.6
294	2	72	24	0	18	3	1	0	0	0	0	0	1	1	4	6	0	0	1	0	1	1	0	0	NA	NA	NA	NA	NA	NA	10.6	10.9	9	9.3	10.3	296	295	239	287	506	130	104	77	94	104	3	2.3	2.6	2.6
295	1	72	9	0	NA	2	0	0	0	0	0	0	0	1	4	4	0	0	0	0	0	0	0	NA	NA	1	NA	36.75	91.42	NA	15.9	13.4	13.2	12.8	12	157	121	112	106	149	182	134	131	139	99	4.6	3.3	3.3	3.8
296	1	72	25	0	12	2	0	1	0	0	0	0	1	1	4	6	0	0	0	0	0	0	0	NA	NA	146.11	78.55	103.88	81.36	50.85	13.5	10.6	7.2	9.6	10.5	162	106	74	72	89	60	43	38	43	64	2.2	2.2	2.1	2.7
297	2	72	34	1	18	1	0	1	0	0	0	0	1	4	4	4	0	0	0	0	1	1	1	0	1	NA	NA	214.35	75.21	85.98	7.4	14	10	10.9	9.9	359	133	110	107	216	65	39	26	34	52	2.5	2.3	2.8	2.4
298	1	73	58	0	NA	1	0	0	1	1	1	0	1	4	4	6	0	0	0	0	1	1	0	NA	NA	33.3	25.6	NA	13.3	NA	8.5	8.5	7.7	9.4	9.9	273	225	291	157	204	73	54	61	68	73	3.1	2.1	2.2	2.5
299	2	73	13	0	NA	2	0	0	1	0	0	0	0	1	1	1	0	0	0	0	0	0	0	NA	NA	NA	NA	NA	NA	NA	11.8	10.5	9.9	10.4	11.9	244	215	188	244	333	182	175	155	150	148	4.2	3.4	3.1	3.2
300	1	73	53	0	28	1	0	0	0	0	0	0	0	3	4	6	1	0	1	0	0	0	0	0	1	NA	NA	NA	NA	NA	14.5	12.4	9.6	9.7	10.5	224	179	149	147	490	100	98	62	72	80	3.3	1.8	2.5	2.9
301	1	73	10	0	NA	3	0	0	1	1	0	0	0	1	3	1	0	0	0	0	0	0	0	0	NA	NA	NA	NA	NA	NA	13.6	13.9	10.6	11	11	256	234	199	241	286	242	230	220	190	170	4.1	4	3	3.3
302	1	73	16	0	25	1	0	1	0	0	0	0	1	1	4	6	0	0	1	0	1	0	0	1	NA	NA	4.74	NA	NA	2.7	15.5	13.7	11.6	11.2	11.5	271	112	86	44	107	132	27	33	32	40	3.7	1.5	3	2.7
303	1	73	61	0	18	1	0	0	1	0	0	0	1	1	4	6	0	1	1	1	1	1	0	0	1	NA	NA	NA	NA	NA	13.2	13.9	9.4	9.2	8.1	305	256	91	55	253	146	43	50	51	42	4.4	3.1	3.1	3.2
304	1	73	35	1	20	1	1	1	1	0	0	0	0	1	1	1	0	0	0	0	1	1	0	NA	NA	9.8	4.96	NA	9.85	9.38	14.2	10.1	9.7	9.7	8.9	70	74	68	74	68	26	62	70	63	54	2.8	3.4	3.4	3.3
305	2	73	29	0	NA	1	1	1	0	0	0	1	1	1	3	3	0	0	1	0	0	1	0	NA	NA	NA	4.39	NA	NA	NA	13.3	17.7	12.7	10.4	11.4	216	198	133	82	200	109	74	42	53	64	4.2	3.5	2.8	2.8
306	2	73	15	0	25	1	0	0	1	0	0	0	1	1	4	6	0	0	0	0	1	0	0	NA	NA	NA	NA	NA	NA	NA	10	10.4	9.3	10.6	9.7	467	306	283	290	327	295	172	135	179	193	3.6	2.1	3.1	3.5
307	1	73	13	0	31	3	0	0	1	0	0	0	0	1	3	3	0	0	0	0	0	0	0	0	1	3.33	126.3	294	212	NA	11.9	13.6	11.1	9.9	9.8	388	416	316	347	475	142	104	102	146	150	4.7	3.9	3.8	3.7
308	2	73	62	0	NA	1	0	0	0	0	0	0	1	1	4	6	0	0	0	0	1	0	1	0	NA	255.55	225.27	214.53	125	72.89	8.5	10.9	9.1	9.1	9.4	383	394	280	195	298	107	89	64	57	67	2.8	2.1	2.8	2.9
309	2	73	28	0	21	3	0	0	1	0	0	0	1	1	4	6	0	0	0	0	1	0	0	0	1	NA	403.69	280.85	114.5	78.41	10.3	9.3	9.1	8.5	8.8	446	180	137	132	256	55	43	39	81	90	2.1	2.3	2.8	2.8
310	1	73	19	0	NA	2	0	0	0	0	0	0	1	1	3	3	0	0	1	0	0	0	0	NA	NA	NA	NA	NA	NA	NA	13.9	14	15.4	11.7	12.7	320	NA	278	251	365	117	95	53	100	143	3.6	2.7	2.7	2.8
311	1	73	45	0	15	1	0	0	0	0	0	1	0	1	2	1	1	1	1	1	1	0	0	NA	1	NA	1	44.44	164.17	146.83	14.1	15	14.8	11	10.6	213	217	197	134	223	205	193	120	122	140	3.9	3.5	NA	NA
312	1	73	22	0	19	3	0	0	1	0	0	1	1	1	3	3	0	0	1	0	0	0	0	0	1	NA	NA	NA	NA	NA	10	10.8	8.4	9.4	9.2	208	179	249	291	410	57	34	48	68	86	3	2.6	3.1	2.9
313	1	74	16	0	38	3	1	1	0	0	0	1	1	1	3	1	0	0	1	0	0	0	0	0	0	NA	NA	15.5	20.9	NA	14	13.4	13.1	10.4	11.7	NA	191	212	96	217	64	37	44	63	57	NA	1.6	2.9	2.9
314	2	74	74	0	NA	1	0	0	1	1	0	0	1	1	4	6	0	0	0	0	0	0	0	NA	NA	0.439	0.929	NA	NA	NA	10	10.7	9.4	10	10.9	217	154	153	NA	63	133	131	112	100	112	NA	2.7	2.8	2.6
315	1	74	30	0	25	2	0	0	0	0	0	0	1	3	3	5	0	0	0	0	0	0	0	NA	1	NA	NA	NA	NA	NA	12	11.6	11	9.3	8.7	NA	264	252	304	514	98	76	45	68	55	NA	2.5	1.5	2.6
316	1	74	29	0	39	2	1	1	1	0	0	0	1	1	4	5	0	0	1	0	1	1	0	0	0	NA	NA	10.3	31.8	9.07	14	14	11.3	10.3	9	NA	504	172	126	265	99	73	39	41	51	NA	2	2.8	3
317	2	74	10	0	18	1	1	1	1	0	0	0	1	1	4	6	0	0	0	0	0	0	0	0	0	NA	224.3	223.02	135	76.48	9.9	8.9	9.2	8.8	8.6	NA	244	177	185	301	96	76	62	73	74	NA	2	3.2	2.6
318	2	74	24	0	NA	1	0	0	1	0	0	0	1	4	3	1	0	0	0	0	0	0	0	NA	NA	NA	19.96	47.46	173.6	56.78	11	10.6	10.5	10.1	9.5	NA	420	463	450	502	130	107	100	104	167	NA	2.8	3	3.1
319	1	75	18	0	34	3	0	0	1	1	0	0	1	2	4	4	0	0	1	0	0	0	0	1	0	31.2	NA	NA	NA	NA	8.9	10.3	9.7	9.8	8.8	263	235	246	221	212	110	73	64	55	53	NA	2.3	2.5	2.5
320	1	75	30	1	25	1	1	1	1	0	1	0	1	1	3	3	0	1	0	1	1	1	0	NA	1	NA	NA	NA	NA	10.3	9.2	8.7	10.3	10.2	9.7	307	260	225	261	186	76	53	38	40	65	2.4	1.5	2.9	2.4
321	2	75	17	0	17	2	1	1	1	0	0	0	0	1	4	6	0	0	1	0	0	0	0	1	NA	NA	30.2	NA	NA	NA	10.5	9.6	9.5	8.7	9.9	NA	229	212	88	355	160	103	91	80	81	NA	2	2.5	2.9
322	1	75	30	0	15	2	0	0	1	1	0	0	0	4	4	6	0	0	0	0	0	0	0	NA	0	NA	121	365	351	132	11.8	13.3	10.8	9.5	7.8	234	231	184	108	184	61	45	32	39	63	2.3	2	2.4	2.8
323	2	75	10	0	18	1	0	0	0	0	0	0	0	1	4	6	0	0	0	0	0	0	0	0	NA	NA	NA	142.88	NA	23.84	13	12.2	10.7	9.3	9	NA	322	299	233	609	220	223	77	88	90	NA	3.8	3.1	2.8
324	2	75	78	1	15	1	1	1	1	1	1	1	0	1	4	6	1	1	1	1	0	1	0	NA	1	NA	188.24	NA	NA	183.9	10.1	8.4	9.9	9.8	9.3	77	76	69	86	145	61	58	43	60	73	2.1	2.1	2.2	2.1
325	1	75	77	0	20	1	0	0	0	0	0	0	1	1	3	1	1	1	1	1	1	0	0	NA	1	NA	NA	NA	NA	NA	9.8	11	11.2	7.9	9.8	522	657	770	757	215	76	72	58	75	65	2.8	2.9	2.5	2.9
326	1	75	7	0	12	1	0	0	0	0	0	0	0	2	3	3	0	0	0	0	0	0	0	0	NA	NA	NA	24.37	NA	NA	14.8	12.8	10.6	10.8	11	184	165	126	179	NA	145	136	99	100	110	NA	3.8	3.2	2.9
327	2	75	14	0	12	2	1	1	1	1	0	0	1	1	4	3	0	0	0	0	0	0	0	0	NA	NA	NA	151.56	165.13	126.89	13	12	11.6	9.8	10.2	NA	205	187	143	278	110	102	66	67	110	NA	2.2	2.5	2.8
328	1	76	11	0	19	2	0	0	0	0	0	0	0	1	3	3	0	0	0	0	1	0	0	0	NA	30.2	NA	NA	NA	NA	13.5	13.1	12	10.7	11.5	201	187	166	190	279	111	100	104	101	77	2.3	NA	2.3	2.1
329	1	76	26	0	NA	3	0	0	0	0	0	0	1	4	4	6	0	0	0	0	0	0	0	NA	NA	NA	NA	NA	NA	1.55	13	13.7	10.9	10.3	11.4	NA	415	302	287	455	165	154	63	82	107	NA	3.4	2.9	3
330	2	76	35	0	32	1	1	0	1	1	0	0	0	1	4	6	0	0	0	0	0	0	0	0	1	NA	NA	19.8	NA	NA	13	12	11.4	10.3	10.7	NA	291	196	186	416	150	98	78	62	56	NA	2.7	2.9	3.3
331	2	76	6	0	19	2	0	0	1	0	0	0	0	1	4	1	0	0	0	0	0	0	0	0	NA	NA	0.406	NA	NA	NA	14	14.1	13	13	13.8	NA	286	272	NA	NA	245	230	199	180	190	NA	3.6	3.2	NA
332	2	76	10	0	14	2	0	0	0	0	0	0	1	1	3	2	0	0	1	0	0	0	0	0	NA	NA	NA	14	10	NA	12	11.1	9.3	8.2	7.6	NA	192	149	104	98	150	120	95	140	145	NA	2.7	2.9	NA
333	1	76	20	0	18	1	0	0	0	0	0	0	0	1	1	1	0	0	0	0	0	0	0	NA	1	NA	NA	148	102	NA	10	6.7	7.7	10.5	10.7	NA	274	235	211	305	100	79	70	86	81	NA	3.2	2.8	3.1
334	1	76	22	0	33	3	0	0	0	1	0	0	1	1	1	2	0	0	0	0	0	0	0	NA	NA	17.9	182	137	NA	NA	13.9	10.8	9	10.8	11.9	218	109	71	57	229	150	85	78	81	87	2.8	1.8	2.6	2.5
335	2	76	26	0	9	2	0	0	1	0	0	0	0	1	2	1	0	0	0	0	0	0	0	0	1	96.28	184.74	159.12	1	23.97	13.4	12.6	10.1	12.8	12.8	244	238	196	212	328	104	72	55	60	70	2.9	2.8	2.7	2
336	1	76	6	0	29	2	0	0	0	0	0	0	0	1	4	6	0	0	0	0	0	0	0	NA	0	NA	NA	NA	NA	NA	12	11.9	9.5	11.8	12	NA	231	163	210	NA	130	81	65	109	115	NA	2.2	2.8	2.7
337	1	76	7	0	23	1	1	0	0	0	0	0	0	1	1	1	0	0	1	0	0	0	0	0	0	NA	NA	254.49	91.38	NA	13	12.7	10.4	10.4	11.9	NA	129	127	149	266	130	123	89	124	136	NA	2.5	3.1	2.9
338	1	76	13	0	17	1	0	0	0	0	0	0	1	1	4	4	0	0	0	0	0	0	0	1	NA	NA	195.32	172.45	NA	28.02	10.4	9.3	8.2	9.1	9.2	212	189	195	211	214	110	79	82	90	119	3.1	2.3	2.8	2.8
339	2	76	21	0	NA	1	0	0	0	0	0	0	1	4	4	1	0	0	0	0	0	0	0	0	NA	28.37	NA	NA	NA	3.27	10.1	10.5	11	10	9.7	521	554	NA	NA	454	220	187	190	195	204	NA	3.1	NA	NA
340	1	77	47	0	NA	3	0	0	1	1	0	0	1	1	1	1	0	0	0	0	0	0	0	NA	NA	NA	NA	5.94	NA	NA	10.6	10.2	10.4	10.2	10.8	409	468	487	344	337	95	60	43	55	69	NA	2.5	2.5	2.1
341	1	77	68	0	24	1	0	0	0	1	0	0	1	1	3	1	1	1	0	0	1	0	1	0	1	NA	NA	NA	NA	NA	11.4	13.2	9.3	11	12	432	337	220	219	288	89	45	55	62	69	NA	2.8	4	3.2
342	1	77	22	0	NA	1	0	1	0	0	0	0	0	4	4	6	0	0	0	0	0	1	0	NA	NA	NA	539	NA	NA	NA	14	13.7	11.8	11.1	12	NA	148	151	141	NA	115	95	51	68	76	NA	2.5	2.8	2.9
343	2	77	17	0	NA	1	0	1	0	0	0	0	1	1	4	6	0	0	0	0	0	0	0	NA	NA	NA	NA	53	154	14.5	9.6	10.1	9.4	9	11	456	555	364	225	372	180	164	78	63	120	NA	3.3	1.7	3.5
344	1	77	17	0	19	1	0	0	1	0	0	0	1	3	3	3	0	1	1	0	1	0	0	NA	1	NA	NA	109	101	25.3	11.6	12.5	8.9	8	9	532	603	290	210	316	149	53	52	55	49	3.8	3.2	3.4	3.2
345	1	77	14	0	26	1	0	0	0	0	0	0	0	1	3	5	0	0	0	0	0	0	0	0	1	NA	NA	NA	149.43	32.8	12	10.5	8.1	8	9.2	NA	448	309	298	398	160	136	98	98	137	NA	2.9	2.6	2.8
346	2	77	33	0	NA	2	0	0	1	1	1	0	0	1	4	6	0	0	0	0	0	0	1	0	NA	NA	140.01	227.24	NA	16.07	11	10.4	9.3	9.1	9.4	NA	257	251	231	280	160	134	100	105	120	NA	3.1	2.6	2.5
347	1	77	17	0	14	2	0	0	1	0	0	0	0	3	4	6	0	0	0	0	0	0	0	0	1	NA	NA	502.02	208.47	164.74	12	11.3	8.7	8.7	10.8	NA	211	136	172	381	130	65	25	46	126	NA	2.8	3.3	3.1
348	1	77	42	0	15	5	0	1	1	0	0	0	0	1	4	6	0	1	0	0	1	0	0	NA	1	NA	226.58	NA	NA	NA	13.1	16.2	14.1	14.6	16.4	282	226	163	98	131	64	55	79	91	91	2.6	2.2	3.1	2.5
349	1	78	12	0	15	1	0	0	1	0	0	0	1	1	1	2	0	0	0	0	0	0	0	NA	NA	NA	72.8	NA	NA	22.9	12.3	11.4	9.6	10.5	10.6	324	264	230	273	331	155	96	88	119	118	4.2	2.8	2.7	3.4
350	1	78	14	0	21	3	1	0	1	0	0	0	1	1	3	1	0	0	1	0	0	0	0	NA	NA	NA	NA	NA	NA	NA	10.5	10.4	10.1	8.9	10	301	265	283	216	272	112	58	58	52	58	2.9	1.8	2	2.3
351	2	78	15	0	16	2	0	0	1	0	0	0	1	1	1	2	0	1	1	0	0	0	0	NA	NA	NA	NA	NA	NA	NA	6.1	8.7	8	9.6	9.7	521	349	315	443	440	111	73	55	98	100	2.5	2.2	2.8	2.6
352	1	78	16	1	27	1	1	1	0	0	0	0	0	1	1	2	0	1	0	1	1	1	0	0	1	NA	57	NA	84.94	156.62	8.7	10.2	9.1	11	8.9	98	102	111	126	38	124	115	59	88	60	2.4	2.2	1.9	3
353	2	78	6	0	24	3	1	1	0	0	0	0	1	1	4	6	0	1	1	0	0	0	0	1	1	NA	77.49	188.62	NA	NA	10.3	10	8.7	9.2	10	296	188	177	223	NA	154	41	51	110	115	4.8	2.5	3.6	3.6
354	1	78	20	0	11	2	0	0	1	0	0	1	1	4	4	5	0	0	1	0	0	0	0	NA	1	NA	NA	NA	NA	NA	12.9	11.7	11.8	12.1	11.2	180	192	209	258	430	153	93	67	73	86	3.2	2.3	2.7	3.3
355	1	79	14	0	34	2	0	1	1	1	0	0	0	1	4	4	0	0	0	0	0	0	0	0	NA	NA	3.96	NA	NA	NA	11.9	10.9	9.6	9.4	9.5	232	202	207	162	165	93	80	55	59	64	4.2	3.5	2.6	2.8
356	2	79	9	0	NA	1	0	0	0	1	0	0	1	1	3	3	0	0	0	0	0	0	0	0	NA	NA	NA	NA	NA	39	13	12.2	10.7	9.7	10.8	NA	270	285	255	462	160	153	120	124	141	NA	2.8	3.1	2.6
357	2	79	28	1	35	3	0	1	1	0	0	0	0	1	3	3	1	1	0	1	1	1	0	0	1	NA	NA	17.7	NA	136	8.9	6.8	7.8	9.5	9.5	NA	78	88	76	56	75	38	55	75	96	NA	3.2	4	3.1
358	2	79	16	0	30	3	0	0	0	0	0	0	0	1	1	1	0	0	1	0	0	0	0	0	1	NA	48.7	NA	148.04	43.3	9	8.6	8.8	8.6	9.1	NA	242	280	245	243	110	96	90	100	92	NA	2.4	3	2.3
359	2	79	61	0	18	2	1	1	0	0	0	0	1	1	3	1	1	0	0	0	0	0	0	0	1	NA	290	NA	NA	NA	10	8.2	7.9	10.6	10.4	NA	195	273	150	230	110	72	23	41	72	NA	2.1	2.6	2.7
360	1	79	201	0	13	3	1	0	1	0	0	1	1	1	3	1	1	1	1	0	1	0	0	0	1	NA	256.83	177.52	111.99	117.27	11	10.8	10	8.5	8	NA	98	77	55	189	36	35	30	30	37	NA	2	2.4	2.7
361	1	79	16	0	25	1	1	0	1	1	0	0	0	1	4	1	0	0	0	0	0	0	0	0	NA	NA	NA	NA	NA	NA	13	12.2	12.7	11.2	10.7	NA	275	225	159	275	170	152	83	82	102	NA	3.7	2.4	2.9
362	1	79	16	0	17	2	1	0	0	0	0	0	0	1	1	1	0	0	0	0	0	0	0	NA	0	NA	NA	168.46	NA	52.28	16	16.2	15.6	13.7	11.8	NA	236	201	132	245	95	64	47	71	77	NA	2.3	2.9	3
363	2	79	17	0	25	1	0	0	1	0	0	0	0	1	4	4	1	0	0	0	1	0	0	0	1	NA	1	208.28	159.3	135.44	13.7	12.6	10.9	11	11.4	148	147	129	110	160	130	99	78	124	119	NA	2.8	2.7	3
364	2	80	12	1	39	1	0	0	1	0	0	0	1	1	3	3	0	1	0	1	1	0	0	0	1	NA	175	85.6	NA	NA	10	8.6	8.8	12.2	9.9	NA	378	361	282	235	155	116	40	54	66	NA	3	3.7	2.3
365	1	82	14	0	30	1	1	0	0	1	0	0	0	1	1	1	0	0	0	0	1	0	0	NA	NA	NA	NA	11.8	NA	46.97	10	9.7	9.3	11	10.7	NA	290	218	195	396	210	196	105	118	103	NA	3	3.1	2.6
366	2	82	6	0	20	1	0	0	1	0	0	0	0	1	3	3	0	0	0	0	0	0	0	0	1	NA	261	228.63	NA	NA	9	8.8	8.4	8.8	9	NA	353	321	256	NA	90	63	54	67	85	NA	2.6	3.1	3
367	2	82	51	1	20	1	0	1	1	0	0	0	1	4	4	6	0	1	0	1	1	1	0	NA	1	NA	NA	231.75	NA	NA	12.3	12	8.1	9.2	7.9	119	141	159	57	190	44	27	27	50	72	2.7	1.4	2.8	2.6
368	2	83	12	0	31	3	0	0	0	0	0	0	1	2	2	2	0	0	0	0	0	0	0	NA	NA	10.8	NA	8	15	NA	9.4	13.3	12.1	11.8	11.2	164	176	199	192	281	130	93	100	100	115	NA	2.4	NA	2.9
369	2	83	61	1	24	3	1	1	1	0	0	0	0	1	4	5	0	0	0	0	1	0	0	0	1	NA	77.6	191	255	85.9	6.8	9	13	12	11.5	522	345	60	99	67	110	30	41	63	71	2.6	1.2	2.6	2.5
370	2	84	18	0	29	3	1	1	1	1	1	0	0	1	3	3	0	0	0	0	0	0	0	NA	NA	NA	NA	NA	NA	NA	15	14	12.2	9.3	9.7	NA	617	504	299	558	110	93	60	72	93	NA	2.1	3.4	2.8
371	2	84	17	0	NA	1	0	0	0	0	0	0	0	1	1	1	0	0	1	0	0	0	0	NA	NA	NA	NA	35.7	94	30.3	12	10	7.9	10.1	10	NA	345	287	249	270	110	100	70	80	85	NA	2.4	3.2	NA
372	2	84	28	0	21	1	0	0	0	0	0	0	0	1	1	1	0	0	0	0	0	0	0	1	NA	NA	445	NA	287	91.2	13.4	12.3	11.3	11.7	9.4	236	223	206	239	293	185	121	130	135	145	2.8	1.8	NA	NA
373	2	84	19	0	19	1	0	0	1	0	0	0	0	1	1	1	0	0	0	0	0	0	0	0	NA	NA	NA	178.43	NA	158.65	11	10	8.7	8.7	9.9	NA	NA	202	246	524	160	150	78	130	144	NA	NA	3	NA
374	2	84	66	0	24	2	1	0	1	0	0	0	1	1	3	3	0	0	0	0	0	0	1	0	NA	17.61	42.59	65.95	93.31	81.89	10.2	9.9	9.4	8.4	9.5	213	244	140	163	227	133	74	60	53	39	2.9	1.7	3.7	2.7
375	2	85	15	0	NA	3	0	0	1	0	0	0	1	1	4	5	0	0	0	0	0	0	0	NA	NA	NA	NA	19.2	NA	NA	12.6	12.5	11.4	11.1	12	243	187	177	219	NA	120	115	73	85	90	NA	NA	2.3	NA
376	2	86	12	0	NA	3	0	0	1	1	0	0	0	1	3	3	0	0	0	0	0	0	0	NA	1	NA	NA	NA	NA	NA	15	15.4	9.6	9	9.3	NA	339	185	215	404	200	184	56	78	69	NA	4.3	2.2	3.1
377	2	88	18	0	38	2	1	0	0	1	1	0	0	1	1	1	0	0	0	0	0	0	0	0	NA	NA	0.192	NA	NA	NA	9	7.7	9.1	9.6	9.9	NA	50	64	69	132	110	77	67	75	85	NA	1.8	3.7	3.1
378	2	89	17	0	30	2	0	1	1	0	0	1	0	1	1	1	0	0	1	0	1	0	0	0	NA	NA	NA	NA	NA	7.03	10	8.1	10	10.2	9.6	NA	580	324	290	246	150	99	48	71	84	NA	2.8	3.3	3.5
379	1	89	12	0	18	1	0	0	1	1	0	0	1	1	4	4	0	0	0	0	0	0	0	NA	NA	NA	16	NA	NA	NA	8.1	7.9	8	9.6	11.7	252	234	200	135	296	123	100	68	62	65	3.4	NA	2.3	3
380	2	89	16	0	NA	1	0	0	1	0	1	0	0	1	2	1	0	0	0	0	0	1	0	0	NA	NA	31.8	113	NA	NA	10	9	9.7	10.4	10	NA	243	201	247	269	160	142	130	97	115	NA	3.8	3.1	2.6
381	1	89	61	0	23	2	1	1	0	0	0	0	0	3	3	5	0	0	0	0	0	1	0	0	1	NA	90.92	296.46	201.9	151.41	11	11.1	9.5	10.2	8.8	NA	93	75	53	103	95	67	29	79	71	NA	1.9	3.5	3
382	1	89	27	0	25	2	1	1	1	0	0	0	1	1	1	1	1	1	0	0	1	0	0	0	1	NA	NA	NA	180.72	130.46	10	9.9	10.3	9.9	8	NA	138	132	47	86	90	45	46	75	49	NA	1.4	2.2	2.4
383	1	89	23	0	15	1	0	1	0	0	0	0	1	1	4	6	0	0	1	0	1	0	0	0	1	NA	NA	NA	NA	NA	14	14.7	12.4	12.2	10.6	NA	165	134	64	66	130	117	75	95	88	NA	2.2	2.8	2.6
384	1	89	33	0	19	1	0	1	0	0	0	1	0	1	4	6	0	1	0	0	1	0	0	0	1	NA	NA	NA	273.31	NA	17	18.2	14	11.9	10.2	NA	241	211	71	91	150	140	29	40	54	NA	3.6	2.6	2.8
385	1	92	28	0	26	2	0	0	1	0	0	0	1	1	4	6	0	0	0	0	0	0	0	0	NA	NA	NA	20.2	17	NA	11.3	11.2	8.8	9.2	10.4	158	155	110	129	216	96	64	58	58	96	3.1	2.3	2.6	2.8
386	1	92	12	0	16	1	0	0	1	0	1	0	0	1	4	6	0	0	0	0	0	0	0	0	NA	NA	NA	NA	NA	NA	11	11.9	8.5	7.7	10.9	NA	206	174	150	263	110	101	84	101	109	NA	3.3	3.2	3
387	1	74	12	0	NA	1	0	0	0	0	0	1	0	2	3	3	0	0	0	0	0	0	0	0	NA	73.26	126.12	150.07	179.05	32.41	13.3	13	12.7	11.5	12.1	246	232	244	263	381	167	147	136	115	96	3.6	3.4	3	3.3
388	1	47	10	0	NA	1	0	0	0	0	0	0	0	1	4	4	0	0	0	0	0	0	0	NA	NA	138.34	131.63	NA	NA	NA	13.9	12.2	12.1	12	11.9	229	221	226	NA	NA	106	97	86	95	100	4.2	3.5	3	NA
389	2	76	20	0	24	3	1	1	0	0	0	0	0	2	4	4	0	0	0	0	1	1	0	0	NA	63.63	185	NA	NA	NA	12.6	12.3	9.3	10.2	11.1	290	105	94	239	404	175	58	53	76	125	3.1	1.4	2.6	3.1
390	1	63	7	0	NA	1	0	0	0	1	0	0	1	1	4	2	0	0	0	0	0	0	0	NA	NA	NA	NA	NA	NA	NA	14	14.2	12.8	12.8	13	NA	259	211	233	NA	180	176	108	118	125	NA	4.1	2.9	2.8
391	2	32	16	0	14	1	0	1	0	0	0	0	0	1	3	3	0	0	0	0	1	0	0	NA	NA	236.46	327.83	NA	NA	NA	7.8	11.8	7.3	10.1	8.5	439	316	349	4.2	2.3	99	26	29	52	83	2.5	1.4	3.2	2.4
392	2	91	7	0	20	1	0	0	1	0	0	0	0	1	1	1	0	0	0	0	0	0	0	NA	NA	1	NA	171	126.5	58.83	11.2	9.1	8.9	9.4	8.7	107	73	71	81	133	107	75	70	82	87	4	3	3.3	3.1
393	2	75	12	0	NA	2	0	0	1	0	0	0	0	2	3	1	0	0	0	0	0	0	0	NA	NA	5.97	NA	NA	NA	NA	12.7	11.8	11.4	11.2	11.1	298	285	266	281	420	172	154	121	154	185	3.5	3.2	2.5	3.4
394	1	29	17	1	21	1	0	0	0	0	0	0	1	1	2	1	1	1	0	1	1	1	0	0	1	171.71	129.06	NA	100.98	49.56	7.8	8.8	8.4	8.9	8.1	93	181	111	75	75	57	36	42	56	57	2.9	2	2.8	2.6
395	1	75	15	0	23	1	0	1	0	0	0	0	1	2	4	5	0	0	0	0	0	0	0	NA	NA	36.28	30.65	209.96	119.02	48.76	12.8	12.1	8.8	8.2	10.2	223	325	179	151	201	103	60	28	52	76	3.2	2	2.8	2.6
396	1	56	8	0	19	1	0	0	0	0	0	1	0	1	4	5	0	0	0	0	1	0	0	0	1	9.83	NA	173.25	NA	NA	15	12.8	12.3	12	12.1	258	154	122	167	432	108	60	74	94	103	3.2	3.1	2.6	2.5
397	1	69	28	0	14	1	0	0	1	0	0	0	0	1	2	2	1	0	0	0	1	0	0	0	1	NA	145.57	115.11	70.9	219.27	10.2	11.7	10.9	8.5	9	357	419	350	334	395	133	98	84	99	78	3.5	2.3	2.9	2.7
398	2	84	53	0	28	2	0	0	1	0	0	0	1	2	3	3	0	1	1	0	0	1	0	0	1	31.38	126.7	116.7	252.79	97.4	10.1	12.1	9.9	9.3	11.3	179	238	239	249	233	114	107	82	78	80	2.9	2.4	2.8	2.6
399	1	72	18	0	NA	1	0	0	1	0	0	0	1	1	3	1	0	0	0	0	0	0	0	NA	1	142.64	30	37.57	186.67	37.3	8.5	9.4	9.8	9.6	8.2	380	504	510	539	543	94	100	84	92	126	2.9	3.2	2.7	3.1
400	1	81	32	0	20	1	0	0	0	0	0	0	0	2	1	3	0	0	0	0	0	0	0	NA	NA	32.58	NA	NA	NA	NA	10.9	11	8.3	9.5	8.4	154	135	136	225	348	127	133	100	93	106	2.9	2.3	2.5	2.9
401	1	69	37	0	18	2	0	1	0	0	0	0	1	2	3	5	0	1	0	1	0	0	0	1	1	77.57	107.86	151.54	68.88	66.59	10.6	9.1	7.6	11.1	8.4	108	74	63	139	60	113	103	81	53	69	2.2	2.2	2.8	2.8
402	2	90	19	0	32	3	0	1	1	0	0	0	0	1	4	6	0	0	0	0	0	0	1	1	0	279.25	230.21	278.37	55.69	46.28	12.1	8.9	9.4	11.1	11.6	302	192	182	164	247	104	66	63	77	96	3.3	1.9	3	2.8
403	2	69	23	0	NA	1	0	1	0	0	0	0	1	1	4	4	0	1	1	0	0	0	0	0	NA	NA	2.39	NA	NA	NA	9.7	9.2	9	9.5	10	266	180	182	97	181	157	83	79	90	126	3.9	2.2	2.3	3.3
404	2	55	10	0	11	1	0	0	0	0	0	0	0	1	4	1	0	0	0	0	0	0	0	0	NA	4.57	5.67	192.57	215.27	109.09	13	13.3	12.9	11	11.3	374	380	346	316	327	220	225	175	150	139	4.3	4.3	3.3	3.5
405	2	60	12	0	31	1	1	1	0	0	0	0	1	2	3	5	0	0	0	0	0	0	0	0	0	71.05	NA	215.45	237.34	32.49	17.5	10.8	10.1	11.9	10.6	425	193	174	194	558	176	90	67	114	133	4.3	2.6	3.7	3.4
406	1	64	13	0	NA	3	0	0	0	0	0	0	1	2	3	3	0	0	0	0	0	0	0	0	NA	100.9	NA	NA	NA	NA	8.9	8.4	8.2	7.9	8.5	419	344	374	464	593	118	104	101	128	170	3.1	2.7	2.6	2.7
407	2	89	15	0	30	2	1	1	1	0	0	0	0	1	1	1	0	1	0	0	1	0	0	0	NA	40.44	NA	NA	NA	58.3	8.2	10.4	9	8.9	8.8	625	521	330	305	443	143	69	52	71	83	3	1.8	3.1	2.8
408	1	58	7	0	28	1	0	0	0	0	0	0	1	1	4	5	0	0	0	0	1	0	0	0	1	394.48	219.15	255.63	298.76	NA	9.3	8.1	7.5	9.2	9.3	440	482	429	513	724	132	121	95	116	157	2.8	2.8	2.8	3.1
409	1	55	38	0	33	1	1	1	1	0	0	1	1	1	1	1	0	0	0	0	0	0	0	0	1	NA	287.76	NA	NA	NA	16.3	12.4	11.7	10.5	10.8	408	304	303	181	300	70	43	42	56	71	3.9	2.2	3	3
410	1	70	12	0	NA	1	0	0	0	0	0	0	1	4	4	5	0	0	0	0	0	0	0	0	1	NA	NA	166.24	NA	NA	10.2	10.8	9	8.2	8.2	427	395	380	431	543	58	69	62	70	77	2.7	2.2	2.4	2.5
411	1	64	14	0	NA	1	0	0	0	0	0	0	1	2	4	4	0	0	0	0	0	0	0	0	NA	NA	NA	89.64	NA	NA	11.2	9.4	7.8	8.6	8.4	851	668	597	442	638	153	102	85	87	89	NA	1.4	1.5	1.6
412	1	38	13	0	NA	2	0	0	0	0	0	0	0	1	3	3	0	0	0	0	0	0	1	NA	NA	NA	NA	23.58	NA	NA	12	11.9	11.6	11.9	9.7	NA	570	496	469	461	127	153	140	151	143	NA	3	2.9	2.9
413	1	65	17	0	NA	1	0	0	0	0	0	0	1	1	4	5	0	1	0	0	0	0	1	0	1	NA	NA	136.98	NA	NA	9.8	10.9	9.2	10	9.8	75	100	66	NA	NA	74	71	52	64	64	3.2	2.7	3	2.6
414	1	46	8	0	NA	1	0	0	0	0	0	0	0	1	4	3	0	0	0	0	0	0	0	NA	NA	NA	NA	81.67	128.09	26.73	13	14	12.7	11.6	13.4	NA	362	341	362	537	200	176	125	133	142	NA	4.1	3	NA
415	1	71	12	0	NA	2	0	0	1	0	0	0	1	1	4	5	0	0	0	0	0	0	0	0	NA	NA	201.43	NA	NA	38.79	9.6	9.4	8.7	9.2	9.7	491	428	445	472	532	140	156	130	136	128	3	3	2.7	3.6
416	2	74	9	0	NA	4	0	0	0	0	0	0	0	2	3	3	0	0	0	0	0	0	0	NA	NA	NA	NA	NA	NA	NA	13	10.7	9	8.8	12.8	244	174	164	206	133	223	147	113	159	162	3.9	2.4	3.1	3
417	1	55	38	0	28	1	0	0	0	0	0	0	1	1	4	5	0	1	0	0	1	0	0	0	NA	NA	NA	297.96	241.96	218.2	10	9.9	9.6	8.5	8.7	NA	636	345	271	374	116	72	47	48	70	NA	2.4	2.5	2.9
418	2	74	80	0	25	1	0	0	1	0	0	0	1	1	4	6	0	1	0	1	1	0	0	0	NA	NA	NA	178.4	114.81	99.05	12	11.6	8.9	8.7	9.1	NA	163	148	166	342	105	56	42	48	71	NA	2.9	1.4	2.4
419	1	60	12	0	NA	3	0	0	0	1	0	0	1	1	4	4	0	0	0	0	0	0	0	0	NA	NA	199.38	242.39	120.33	40.24	13.2	12.1	11.2	10.2	11.2	157	153	140	224	384	192	162	142	159	169	2.9	2.6	NA	2.3
420	1	86	40	1	38	4	0	0	1	1	0	0	0	2	4	5	0	0	0	0	0	1	1	0	0	2.68	NA	77.52	111.42	69.55	12	14.6	12.1	12.5	9.9	87	113	88	96	60	145	82	50	48	25	3.8	3.2	2.8	2.7
421	1	57	5	0	NA	1	0	0	0	0	0	0	0	1	4	4	0	0	0	0	0	0	0	0	NA	NA	NA	NA	NA	NA	14.4	13.6	12.5	12	13.5	188	160	136	NA	NA	197	160	146	128	135	NA	NA	3.4	NA
422	2	36	14	0	NA	1	0	0	0	0	0	0	0	2	4	4	0	0	0	0	0	0	0	0	NA	219.34	257.12	253.23	195.48	85.97	11.4	11.8	10.3	9.3	9.9	172	172	147	147	418	109	99	81	112	163	3.1	2.5	3.1	2.5
423	2	66	21	0	NA	3	0	0	1	1	1	0	0	1	4	6	0	1	0	0	1	1	0	0	1	NA	60.46	NA	NA	21.83	11	11.9	7.7	12.4	12.4	63	19	83	60	60	65	52	42	88	95	3.1	1	3.4	2.6
424	2	71	35	1	40	3	0	1	0	1	0	0	1	2	3	3	1	1	1	1	0	1	1	1	1	NA	NA	NA	NA	149.2	8.8	8.7	10.8	10.2	9.1	303	288	208	224	67	118	94	53	49	32	3.4	NA	1.9	NA
425	1	83	14	0	NA	1	0	0	1	0	0	0	1	2	4	6	0	0	0	0	0	0	0	NA	0	NA	NA	51.47	NA	27.59	11.1	10.1	9.2	8.4	8.2	701	665	560	446	521	141	87	65	72	100	3.5	2.2	3	2.5
426	1	50	4	0	NA	1	0	0	0	0	0	0	0	1	1	1	0	0	0	0	0	0	0	0	NA	NA	NA	152.34	NA	NA	14	13.8	12	12.4	13.5	NA	238	230	258	NA	140	124	100	122	132	NA	3.6	2.8	3.4
427	1	75	35	1	30	3	0	1	1	0	0	0	1	1	1	2	1	1	0	0	0	1	0	0	1	NA	NA	125.41	186.51	139.08	10.9	7	8.6	9.4	8	128	95	107	129	96	59	19	33	43	50	1.5	1	2.6	2.1
428	2	90	30	0	28	4	0	0	1	0	0	1	1	2	3	3	0	0	0	0	1	0	0	0	NA	NA	NA	96.2	235.88	61.11	9.8	7.5	7.9	8.3	8.9	353	281	272	316	201	185	86	86	91	90	NA	1.5	1.9	3.2
429	1	74	20	1	36	4	0	1	1	0	0	0	0	1	4	5	0	1	0	1	0	1	0	0	1	NA	211.29	134.16	176.44	235.24	10.3	11.4	7.7	8.2	7.4	36	22	42	48	27	62	61	26	46	38	2.8	1.3	3.1	2.8
430	2	41	16	0	10	2	1	0	0	0	0	0	0	1	3	3	0	0	0	0	0	0	0	0	NA	NA	57	NA	NA	NA	10.9	9.9	7.7	8.5	9.3	343	314	218	271	402	118	64	60	75	132	3.7	2.3	2.8	3.4
431	2	72	12	0	NA	1	0	0	1	0	0	1	0	3	3	3	0	0	0	0	0	0	0	0	NA	NA	27.5	139.16	41.11	NA	14.4	14.1	9.4	10.3	9.8	245	222	141	215	329	204	171	99	153	133	3.3	1.9	2.9	3.6
432	1	55	50	0	25	1	0	1	0	0	0	0	1	2	3	5	1	1	0	1	1	1	0	0	NA	NA	195.05	200.3	NA	85.73	10.9	13.2	12.5	8.8	8.6	454	230	95	41	87	93	23	36	34	79	3	0.8	2.1	2.4
433	1	55	19	0	NA	2	0	0	0	0	0	0	0	1	3	3	0	0	1	0	0	0	0	NA	NA	175.51	NA	NA	NA	21.67	11.1	10.5	10.7	8.8	8.9	181	112	118	162	424	69	41	42	73	128	2.6	1.7	1.8	2.3
434	2	68	69	0	NA	1	0	0	0	0	0	0	1	2	3	3	0	0	0	0	0	0	0	0	0	57.84	107.57	70.05	118.83	38.18	7.1	8.3	9.4	7.5	7.8	315	346	215	204	331	69	41	42	73	128	2.4	1.6	2.9	3.2
435	1	31	110	0	7	3	0	0	0	0	0	0	0	1	4	4	1	1	1	0	0	0	0	0	NA	80.06	NA	295.42	233.04	175.59	9	9.5	8	7.7	6.5	766	565	511	462	477	100	53	54	62	73	3.1	2.4	2.2	2.6
436	2	47	25	0	28	4	0	1	0	0	1	0	0	1	4	6	0	0	1	0	1	1	0	NA	1	NA	NA	326.34	274.56	99.03	11	10.3	9.8	10.6	9.5	NA	209	252	110	289	112	95	86	87	108	NA	2.8	2.3	2.7
437	1	71	26	0	36	1	0	1	1	1	0	1	0	1	4	5	0	0	1	0	0	1	0	0	NA	NA	341.28	264.68	152.66	103.88	14.8	15.5	13.4	11.7	13.9	405	436	306	159	224	78	46	42	67	82	2.8	1.7	2.9	2.8
438	1	81	5	0	16	2	0	0	1	0	0	0	0	1	1	1	0	0	0	0	0	0	0	NA	0	NA	NA	98.42	122.08	NA	12.5	12.7	11.6	10.3	11	NA	115	124	117	NA	114	73	64	84	110	NA	3.6	2.9	2.8
439	2	83	10	0	18	2	0	0	1	0	0	0	0	2	3	5	0	0	0	0	0	0	0	0	1	NA	NA	206.63	175.33	NA	14	13.7	13	10.2	10.8	NA	315	347	296	667	149	91	89	69	110	NA	2.9	1.7	2.8
440	2	77	8	0	13	1	0	0	1	1	0	0	1	2	4	6	0	0	0	0	0	0	0	NA	NA	NA	NA	95.28	179.54	NA	11.5	10	9.8	8.6	8.5	417	NA	220	123	179	157	109	84	66	94	2.6	NA	2.4	2.6
441	2	66	10	0	33	3	0	0	1	0	0	0	0	1	4	1	0	0	0	0	0	0	0	0	NA	NA	72.39	210.26	NA	NA	12.6	12.3	10.6	10.5	11.3	305	227	160	123	596	141	58	42	66	132	3.5	1.9	3	3.2
442	1	68	14	0	21	2	0	0	0	0	0	0	1	1	4	6	0	0	0	0	0	0	0	0	0	NA	177.31	109.11	184.1	59.42	13.6	11.6	9.1	9.6	9.2	643	517	340	267	398	151	99	26	48	115	3.3	1.2	2	2.7
443	1	70	22	0	10	2	0	0	0	0	0	0	1	2	4	4	0	0	0	0	0	0	1	NA	0	NA	NA	203.31	138.68	66.19	13.7	13.3	12.6	12.1	12.3	291	290	266	266	476	182	163	152	194	178	3.4	2.9	2.6	3
444	1	70	9	0	13	3	0	0	1	0	0	0	1	1	4	6	0	0	0	0	0	0	0	0	NA	NA	1.97	140	117.79	21.02	9.8	8.7	10.4	9.3	10.3	333	356	335	306	385	109	80	71	88	90	3.6	2.4	2.1	2.5
445	2	65	7	0	NA	2	0	0	0	0	0	0	1	1	4	5	0	0	0	0	0	0	0	0	NA	23.38	NA	18.78	10.01	5.86	8.1	8.6	8.2	9.1	9.7	355	408	382	430	559	117	128	116	136	141	2.9	3.1	2.8	3.6
446	2	55	13	0	NA	2	0	0	1	0	0	0	1	2	4	6	0	0	0	0	0	0	0	1	NA	7.93	NA	NA	NA	16.04	10.5	9.2	9.3	7.4	10.6	440	479	458	444	565	153	79	76	72	97	3.2	2.1	2.1	3.1
447	1	74	10	0	14	3	0	0	0	0	0	1	1	2	3	6	0	0	0	0	0	0	0	NA	NA	NA	50.93	33.92	128.99	74.95	10.4	10.9	10.3	8.7	9.9	534	500	474	316	561	148	134	70	87	118	2.7	2.7	2.3	2.5
448	2	81	8	0	20	3	0	0	1	0	0	0	1	1	4	4	0	0	0	0	0	0	0	0	NA	NA	126.64	198.07	65.95	6.12	10.8	10.2	9.7	11.4	10.5	150	129	130	141	133	90	80	79	155	147	3.4	2.9	2.7	2.9
449	1	24	13	0	12	3	1	0	0	0	0	0	0	1	4	4	0	0	1	0	0	0	0	0	0	NA	NA	186.62	160.31	138.27	10	10.3	7.7	9.9	9.1	NA	445	228	175	167	95	67	56	55	65	NA	2.6	2.8	2.5
450	1	80	14	0	27	1	0	0	1	0	0	0	1	3	4	4	0	0	0	0	0	0	0	0	0	NA	186.62	165.11	153.8	115.8	10.3	7.7	9.5	9.7	9.4	445	228	185	171	211	126	65	59	133	132	2.6	2.8	2.5	2.8
451	1	67	46	0	23	2	0	1	0	0	0	0	1	1	4	5	0	1	1	1	1	0	0	0	1	112.71	NA	108.18	263.32	111.05	11.7	10.1	9.9	9.1	7.2	419	428	365	478	195	72	59	29	46	51	2.5	2.6	2.5	2.8
452	1	72	15	0	NA	2	0	0	1	0	0	0	1	2	3	5	0	0	0	0	0	0	0	0	0	NA	27.56	NA	218.95	283.87	13.9	14.7	15.9	11.9	11.1	240	260	214	178	201	118	99	82	66	62	3.2	3.2	2.8	3
453	1	80	20	0	NA	1	0	0	0	0	0	0	1	2	4	6	0	0	0	0	0	0	0	0	1	NA	NA	NA	NA	196.76	10	7.1	9.7	10.9	8.7	NA	341	227	274	314	135	56	59	86	85	NA	1.4	3.2	3.2
454	1	76	6	0	NA	1	0	0	0	0	0	0	1	2	1	2	0	0	0	0	0	0	0	NA	NA	NA	NA	NA	NA	NA	13	12.8	11.8	11.9	11.6	NA	273	260	243	310	151	156	124	125	121	NA	3.6	3.2	3.2
455	1	78	16	0	NA	2	0	0	0	0	0	1	1	1	2	1	0	0	0	0	0	0	0	NA	NA	NA	38.74	NA	NA	50.42	10.3	9.9	9.1	9.1	8.5	129	148	146	137	178	160	104	104	101	91	3.2	2.1	2.1	2.9
456	1	80	16	0	NA	2	0	1	0	0	0	0	1	2	3	5	0	0	1	0	0	0	0	0	NA	NA	NA	47.79	173.88	27.62	10.3	9.6	8.2	8.9	9.8	170	149	151	161	163	141	139	100	85	91	3	3	2.2	2.4
457	1	73	11	0	NA	1	0	0	0	1	0	0	1	2	4	4	0	0	0	0	0	0	0	0	NA	2.11	NA	NA	NA	99.42	12.6	12.3	12	9.5	10.8	170	172	175	133	244	175	110	99	100	109	3.5	2.5	2.6	NA
458	2	71	17	0	32	4	0	0	0	0	0	0	0	3	4	4	0	0	0	0	1	0	0	0	NA	NA	46.49	74.46	99.15	36.74	12	10.9	14.7	12.1	11.5	NA	66	36	52	44	91	45	51	59	52	NA	2.9	2.2	2.7
459	1	82	32	0	29	1	0	1	0	0	0	0	0	1	4	6	0	1	0	0	1	0	0	0	1	106.02	NA	101.25	101.96	86.05	11.6	11	10.3	9.5	9.3	260	214	176	204	311	72	30	32	65	91	2.2	1.4	2.3	2.6
460	2	78	190	0	NA	1	0	0	1	0	0	0	1	2	4	6	0	0	0	0	0	0	0	NA	NA	94.84	NA	NA	81.16	8.47	7.5	9.6	8.4	8.7	6.2	293	303	289	244	339	82	113	101	90	97	2.7	3.1	2.5	3.2
461	1	72	12	0	NA	2	0	0	0	0	0	0	0	1	4	6	0	0	0	0	0	0	0	0	NA	13.22	NA	109.51	74.84	15.92	12.5	12	11.6	10.9	11.4	147	134	133	105	225	115	99	73	77	79	3.2	2.3	2.4	2.6
462	2	33	6	0	NA	1	0	0	0	0	0	0	0	1	4	4	0	0	0	0	0	0	0	NA	NA	59.47	NA	NA	176.96	11.89	12	12	12.6	11	13.4	254	281	313	293	536	220	197	167	159	159	3.6	4.2	3.2	2.9
463	1	19	7	0	NA	1	0	0	0	0	0	0	0	1	3	3	0	0	1	0	0	0	0	0	1	56.96	57.16	81.37	115.27	NA	10.7	10.3	9.7	9.3	10	402	470	442	621	NA	90	83	77	122	130	2.7	2.6	2.2	2.8
464	1	39	13	0	NA	3	0	0	0	0	0	0	1	1	4	6	0	0	0	0	1	0	0	0	1	313	NA	262.95	267.91	NA	8.6	7.4	8.9	8.7	8.1	336	314	329	376	639	110	96	42	87	125	3.2	2.6	3.1	2.6
465	1	53	50	0	NA	1	0	0	0	0	0	0	1	1	4	5	0	1	0	0	0	0	0	NA	1	18.58	NA	126.59	163.65	172.88	12.3	11.5	14.2	11.8	12.1	115	117	141	271	807	61	67	50	86	111	2.5	1.8	2.3	2.9
466	1	59	9	0	NA	1	0	0	0	1	0	1	1	1	3	1	0	0	0	0	0	0	0	0	0	24.93	174.66	242.25	240.72	110.91	15.5	12.2	10	10.5	10.8	292	234	182	210	368	92	48	36	81	125	3.7	2.1	3.1	3.1
467	1	85	20	0	NA	1	0	0	1	0	0	1	0	2	3	3	0	0	1	0	0	0	0	NA	NA	NA	NA	NA	NA	NA	9.6	10.7	10.3	8	9.3	189	NA	139	101	136	109	102	54	62	71	3.4	3.6	2	2.9
468	2	76	10	0	26	3	0	0	0	0	1	0	0	1	4	6	0	0	0	0	0	1	0	0	0	NA	NA	241.59	289.88	116.12	7	8	8.3	6.8	7.8	138	112	129	158	198	149	107	104	139	169	3.4	2.7	2.6	3
469	1	69	8	0	17	3	0	0	1	0	0	0	1	1	4	5	0	0	0	0	0	0	0	NA	1	NA	NA	196.26	NA	NA	12.8	11.7	10.6	8.6	11.1	505	320	280	297	550	163	156	96	103	114	4.4	3.1	2.8	3.1
470	1	53	36	0	7	4	0	0	0	0	0	0	1	1	3	1	0	1	1	1	1	1	0	0	1	NA	217.67	NA	NA	NA	13.2	13.9	10.7	7.4	10.5	206	254	181	177	284	110	51	51	61	115	2.2	1.5	3	2.5
471	2	70	14	0	NA	4	0	0	1	1	0	0	0	1	1	1	0	0	1	0	0	0	0	0	1	107.67	117.05	374.97	167.95	87.84	14.9	14.1	14.3	10.9	10.3	419	331	359	227	306	120	101	57	63	70	4.1	2.3	2.3	2.6
472	2	37	22	0	NA	2	0	0	0	0	0	0	1	2	4	5	0	0	0	0	0	0	0	NA	NA	NA	NA	NA	NA	NA	8.5	10.7	10.7	9.2	7.9	273	169	186	225	127	119	100	77	87	98	2.3	2.6	2.5	2.2
473	1	35	12	0	11	3	0	0	0	0	0	0	0	1	4	4	0	0	0	0	0	0	0	NA	NA	NA	NA	NA	288.41	43.4	13	12	12.2	11.4	11.9	182	NA	196	158	328	157	116	64	81	146	3.4	NA	2.5	2.5
474	1	50	14	0	NA	2	0	0	0	0	0	0	1	1	4	5	0	0	0	0	1	0	0	0	1	43.45	133.24	207.39	264.27	114.09	12.4	12.5	11.7	9.9	9.9	257	210	197	166	273	149	143	83	118	128	3	3.1	2.5	2.7
475	1	49	24	0	16	1	0	0	0	0	0	0	0	2	4	6	0	0	0	0	0	0	1	0	1	NA	190.59	177.65	212.92	69.78	9.5	8.1	8.5	7.6	9.2	349	251	318	276	290	123	118	83	78	103	2.8	2.1	2.7	2.3
476	1	85	13	0	NA	2	0	0	1	0	0	0	1	1	4	5	0	0	0	0	0	0	0	0	NA	58.7	NA	149.98	NA	NA	7.5	8.2	8	7.9	8.6	134	151	173	182	244	85	75	60	70	88	2.9	2.3	2.6	2.9
477	1	57	12	0	NA	3	0	0	0	0	0	0	1	1	1	1	0	0	0	0	0	0	0	0	0	NA	2.57	NA	31.84	35.98	10.3	8.2	7.7	9.1	7.7	39	133	93	69	31	71	77	67	57	42	2	2.2	1.9	2.2
478	1	45	7	0	10	3	0	0	0	0	0	0	0	1	4	1	0	0	0	0	0	0	0	0	NA	NA	NA	NA	58.83	NA	18.7	14.8	14.6	15	14.8	232	185	175	200	NA	193	107	107	133	170	5.2	3.4	3.6	3.7
479	1	72	107	1	29	2	0	0	0	0	0	0	1	1	1	1	1	1	0	0	1	1	0	0	1	NA	NA	NA	NA	NA	8	7.3	7.2	10.3	8.1	277	281	126	49	82	70	50	36	62	57	2.5	1.8	3.1	2.5
480	2	82	10	0	NA	2	0	0	0	1	0	0	1	1	2	1	0	0	0	0	0	0	0	0	NA	NA	43.26	113.72	195.19	21.52	13.9	12.5	12.2	12.1	12.9	198	139	136	129	276	152	116	101	133	149	3.7	3.1	3	3.2
481	2	81	25	1	34	3	0	1	1	0	1	0	1	1	3	3	0	1	0	1	0	1	0	0	1	228.18	211.32	190.23	228.57	244.82	9.2	9.7	7.2	9.5	8.1	57	51	52	104	27	37	32	28	42	44	2.6	2.2	3	2.7
482	2	74	10	0	NA	2	0	0	1	0	0	0	0	1	4	4	0	0	0	0	0	0	0	NA	NA	NA	214.43	181.6	NA	NA	13.1	11.6	11.3	10.8	11	244	218	219	311	NA	186	154	110	127	129	3.8	2.8	2.7	3
483	1	49	11	0	26	1	0	0	0	0	0	0	0	1	3	3	0	0	0	0	0	0	1	NA	NA	NA	NA	239.1	197.53	NA	15.8	14.8	13.6	11.4	10.6	337	226	192	202	590	298	172	140	195	191	4.6	2.9	2.9	3.1
484	1	51	6	0	NA	2	0	0	0	0	0	0	1	1	3	3	0	0	0	0	0	0	0	NA	NA	24.93	174.66	242.25	240.72	110.91	15.5	12.2	10	10.5	10.8	292	234	182	210	368	180	111	81	99	140	4.5	2.9	2.8	2.9
485	1	58	7	0	NA	1	0	0	0	0	0	0	1	1	1	2	0	0	0	0	0	0	0	NA	NA	NA	9.74	NA	NA	NA	12.8	12.7	10.3	9.3	9.9	317	366	257	322	572	159	181	105	130	146	3.9	2.7	2.9	2.9
486	2	73	6	0	NA	2	0	0	1	1	0	0	1	2	4	6	0	0	0	0	0	0	0	NA	NA	NA	NA	165.03	216.05	NA	11.8	11.2	9.2	9.6	10	452	402	290	307	NA	146	113	75	71	112	3.8	2.7	2.7	2.9
487	1	35	14	0	NA	2	0	0	0	0	0	1	0	2	3	3	0	0	0	0	0	0	0	NA	NA	26.95	NA	NA	117.88	NA	13.2	15.8	14.2	11.5	12	379	472	405	277	395	152	152	81	105	129	3.4	2.8	2.7	3
488	2	44	10	0	NA	2	0	0	0	0	0	0	0	2	4	4	0	0	0	0	0	0	0	NA	NA	1	1	NA	163.87	NA	12.9	12.4	11.2	9.7	10.6	282	285	272	217	383	132	122	60	79	100	3.7	3.4	2	2.2
489	1	62	14	0	12	1	1	0	0	0	0	0	0	1	4	4	0	0	0	0	0	0	0	0	0	NA	NA	281.04	214.45	56.89	11.8	11.2	12.8	11.2	12.3	121	97	102	112	366	80	57	75	85	97	3.6	3.2	2.9	2.7
490	1	31	31	0	NA	3	0	0	0	0	0	0	0	1	3	2	0	0	1	0	0	0	0	NA	NA	31.47	NA	154.27	148.14	39.13	11.3	11	8.4	8.9	11.9	524	513	381	311	506	123	126	89	74	102	3.4	3	2.1	2.6
491	2	45	77	0	16	3	0	0	0	0	0	0	1	1	3	5	0	0	0	0	0	0	0	0	NA	40.87	57.47	NA	NA	NA	11.3	10.4	8.8	9	9.2	297	261	255	265	362	185	124	74	90	128	3.5	3.1	2.7	2.9
492	2	52	7	0	NA	1	0	0	0	0	0	0	0	2	3	3	0	0	0	0	0	0	0	NA	NA	NA	108.98	102.1	77.61	15.41	13.4	12.7	10.8	8.8	8.9	247	220	205	201	266	176	113	87	90	110	3.5	2.2	2.5	3
493	2	75	12	0	NA	4	0	0	1	1	0	0	0	2	3	2	0	0	1	0	0	0	0	0	NA	85.86	NA	NA	169.3	34.26	10.1	10.7	11.4	9	9.8	247	265	242	235	360	124	101	66	105	138	2.8	NA	2.4	2.7
494	1	59	13	0	NA	3	0	0	0	0	0	0	1	1	2	1	0	1	0	0	0	0	0	0	0	NA	69.85	NA	NA	NA	12.3	10.6	9.6	9.6	10.7	103	85	66	84	96	132	90	81	81	86	3.2	2.3	2.5	2.2
495	1	78	25	0	NA	2	0	0	1	1	0	0	1	2	3	3	0	0	0	0	0	0	0	0	NA	NA	8.06	NA	NA	NA	9.4	11.1	10.7	10.2	10.9	123	108	116	126	157	76	68	61	81	87	4	3.5	3.4	3.5
496	2	65	17	0	NA	3	0	0	0	0	0	0	0	1	3	3	0	0	0	0	0	0	0	NA	1	NA	NA	152.44	101.68	46.45	10.4	10.6	10.5	10.7	9.7	196	134	146	166	259	66	58	56	80	91	2.9	1.8	2.9	2.4
497	1	55	11	0	NA	1	0	0	0	0	0	1	1	1	1	2	0	0	0	0	0	0	0	0	NA	NA	16.26	NA	NA	54.41	11.8	11.1	9.2	7.7	9.6	333	161	137	133	230	166	149	76	92	98	4.1	3.6	2.5	2.7
498	2	63	17	0	NA	3	0	0	0	0	0	0	1	2	4	5	0	0	0	0	0	0	0	0	NA	31.63	35.23	NA	275.04	43.82	11.5	10.7	10.4	9.2	9.6	556	329	327	243	249	138	93	150	168	188	3.6	2.3	2.4	2.9
499	1	48	13	0	20	2	0	0	0	0	0	0	0	1	2	1	0	0	0	0	0	0	0	0	NA	NA	268.68	307.18	289.28	NA	16.6	14.8	9.2	9.8	10	405	358	288	290	NA	153	130	84	123	163	3	2.5	2.3	2.6
500	2	54	13	0	NA	3	0	0	0	0	1	0	0	3	4	4	0	0	0	0	0	0	0	NA	NA	42.21	NA	47.97	NA	NA	11.2	10.1	8	12.2	11.1	NA	343	140	184	329	139	52	52	92	119	NA	3.3	3.3	3.1
501	2	47	9	0	NA	3	0	0	0	0	0	0	1	1	4	6	0	0	0	0	0	0	0	NA	NA	NA	NA	65.22	93.69	15.79	11.1	11	11.2	9.4	9.3	238	216	240	192	314	168	90	91	94	131	3.4	2.5	3.1	2.9
502	2	36	22	0	NA	2	0	0	0	0	0	0	0	1	3	3	0	0	0	0	0	0	1	0	1	NA	5.95	NA	229.7	131.76	10	7.9	9.6	8.3	10.7	NA	301	226	166	133	186	158	114	109	140	NA	3.6	2.8	3
503	1	68	9	0	14	3	0	0	1	0	0	0	1	1	4	5	0	0	0	0	0	0	0	NA	NA	NA	NA	NA	NA	NA	12	11.3	9.2	8.1	8.2	NA	241	151	98	161	140	88	72	102	103	NA	3.2	2.3	3
504	1	82	22	0	13	2	0	0	0	0	0	0	1	1	2	1	1	0	0	0	0	0	0	1	1	NA	NA	NA	NA	NA	13.9	10.9	8.7	9.2	9.8	144	73	48	46	179	78	65	47	55	65	2.7	2.4	2.4	3
505	2	85	9	0	30	4	0	0	1	0	0	0	0	1	4	6	0	0	1	0	0	0	0	0	1	NA	140.23	238.84	135.67	NA	13.1	11.7	11	10	12	175	142	142	153	NA	121	81	82	115	126	2.7	1.8	2	2.9
506	1	73	12	0	37	4	0	0	1	0	1	0	0	1	3	3	0	0	0	0	0	0	0	0	NA	NA	234.07	236.31	160.57	45.16	13	13.9	12.6	9.6	9.4	NA	202	154	118	131	176	109	78	76	112	NA	3.7	2.3	2.9
507	1	76	22	1	28	2	0	0	0	1	0	0	1	1	1	1	0	1	0	1	1	0	0	0	0	NA	179.67	NA	NA	151.75	10.5	8.6	8.9	8	10.6	461	119	69	35	45	109	44	68	70	55	NA	1.7	2.4	2.7
508	1	38	10	0	NA	2	0	0	0	1	0	0	0	1	3	3	0	0	0	0	0	0	0	0	0	NA	37.59	NA	183.81	NA	14	13.4	11.7	10	11.7	NA	313	265	229	372	156	112	81	76	103	NA	3.4	2.7	3.2
509	1	34	13	0	NA	2	0	0	0	0	0	0	0	1	4	4	0	0	0	0	0	0	0	NA	1	NA	143.69	169.09	72.84	46.84	15.3	14.1	12.4	13	12.3	312	290	296	451	470	143	125	93	98	148	3.2	2.8	3.3	3.3
510	2	40	8	0	NA	3	0	0	0	0	0	0	0	1	4	4	0	0	0	0	0	0	0	0	NA	NA	NA	152.2	138.28	47.36	8.4	8.4	9.6	8.7	9.9	186	182	175	176	319	108	91	94	114	165	NA	2.6	2.4	2.6
511	1	57	11	0	19	3	0	0	0	0	0	0	1	1	1	1	0	0	0	0	0	0	0	NA	NA	NA	22.68	NA	NA	NA	14.5	14	12.9	10.4	10.5	177	177	147	155	186	151	125	104	102	124	4.2	3.7	3.4	2.9
512	1	73	15	0	NA	2	0	0	1	0	0	0	0	1	3	3	0	0	1	0	0	0	0	NA	NA	NA	NA	NA	NA	NA	14	14.2	13.6	10.7	10.6	NA	240	224	163	249	140	108	82	75	111	NA	3	2.5	3.1
513	2	52	11	0	NA	1	0	0	0	0	0	0	0	1	4	4	0	0	0	0	0	0	0	0	NA	NA	1.16	114.51	219.08	58.99	12.6	12.9	11.3	8.7	9.3	303	269	223	171	305	199	170	128	95	76	4.1	3.5	3	2.7
514	1	80	36	0	34	3	1	0	0	0	0	0	0	1	4	5	0	0	1	0	0	0	0	0	1	3.53	162.92	221.68	291.51	108.93	14.9	14.5	14.8	10.2	11.4	248	201	132	33	73	107	36	23	32	70	4	1.7	2.8	2.6
515	1	60	57	0	18	2	0	0	0	0	0	0	1	4	3	3	0	0	0	0	0	0	0	0	NA	NA	NA	NA	NA	NA	12	8.8	9.6	11.1	11.4	NA	321	304	242	260	140	77	85	89	124	NA	2.4	3.1	3
516	2	68	5	0	NA	3	0	0	0	0	0	0	0	2	3	3	0	0	0	0	0	0	0	NA	0	1.82	30.65	149.02	84.41	NA	13.5	9.6	9	7.2	9	229	134	155	153	NA	203	150	84	100	156	4.2	3.1	2.4	2.4
517	1	41	18	0	NA	1	0	0	0	0	0	0	0	2	3	3	0	0	0	0	0	0	0	NA	0	2.4	NA	NA	NA	NA	16.1	15.2	13.1	10.9	11.9	255	141	118	167	248	149	102	38	61	93	4.5	2.5	3.1	3.1
518	2	58	34	0	20	3	0	0	1	0	0	0	1	4	4	5	0	0	0	0	0	0	0	0	1	189.74	121.74	178.28	176.14	186.7	10.5	11.3	10.1	9.5	9.5	165	207	174	151	287	63	64	53	43	49	2.9	2.4	2.5	2.5
519	2	35	6	0	NA	2	0	0	0	0	0	0	0	2	3	3	0	0	0	0	0	0	0	NA	NA	NA	0.65	71.55	86.98	NA	12.6	11.5	11	9.7	10	193	171	179	141	NA	180	122	104	112	130	4.5	3.2	2.9	3.1
520	2	43	22	0	NA	4	0	0	0	0	0	0	1	1	3	1	0	0	0	0	0	0	0	NA	0	NA	NA	NA	NA	NA	5.8	10.2	11	8.8	8.4	187	143	172	272	365	42	38	39	51	88	2.8	2.2	2.4	3
521	1	34	29	0	11	2	0	0	0	0	0	0	1	3	4	5	0	1	1	0	0	0	0	0	NA	NA	242.22	174.29	362.61	97.29	11.4	12.7	12.7	9.5	9.6	483	647	604	420	468	158	106	109	127	162	NA	2.6	2.6	2.7
522	2	79	12	0	26	2	0	0	1	0	0	0	0	1	4	4	0	0	0	0	0	0	0	0	0	NA	NA	NA	NA	NA	11.8	13	12.1	9.1	9.6	160	180	193	252	467	145	83	64	85	131	NA	1.9	2.1	2.5
523	2	64	12	0	12	3	0	0	0	0	0	0	0	2	3	3	0	0	0	0	0	0	1	0	NA	NA	7.02	9.84	26.61	NA	15	15.4	11.6	11.4	10.8	NA	309	259	313	378	321	224	159	147	134	NA	3.9	2.6	2.8
524	1	78	4	0	18	1	0	0	0	0	0	0	0	3	3	3	0	0	0	0	0	0	0	0	0	NA	0.61	19.05	118.82	NA	13.9	12.9	12.3	11.9	12	314	240	242	238	NA	206	160	155	159	156	4.5	3.1	3.1	3.3
525	2	39	41	0	NA	1	0	0	0	0	0	0	0	4	3	5	0	0	1	0	0	0	1	NA	1	NA	NA	NA	NA	NA	15	15.8	12.4	10.3	9.2	NA	507	332	256	276	156	143	68	51	49	NA	2.6	2.4	2.6
526	1	56	23	0	18	2	1	0	0	0	0	0	1	4	4	4	0	0	1	0	0	0	0	0	0	56.17	NA	95	143.56	NA	10.7	11	9.3	10.1	9.8	488	650	433	391	403	100	97	53	59	119	3.3	1.7	2.8	2.8
527	2	53	7	0	NA	1	0	0	0	0	0	0	0	1	4	4	0	0	0	0	0	0	0	NA	NA	NA	NA	NA	NA	NA	13	11	10	9.4	9.8	342	261	248	294	368	189	156	103	111	119	4.3	NA	4.3	3
528	1	80	15	0	15	3	0	0	1	0	0	0	0	1	3	3	0	0	1	0	0	0	1	0	0	1.52	102.37	187.12	250.41	NA	15.8	13.4	13	13.8	11	181	129	102	61	174	117	83	41	49	66	3	2.6	3.1	3.2
529	1	50	26	0	NA	3	0	0	0	0	0	0	0	1	3	3	0	0	0	0	0	0	0	0	NA	NA	NA	150.62	206.5	134.56	12	8.4	7.7	8.3	9.3	NA	757	696	560	748	74	59	56	75	103	NA	1.9	2.4	2.7
530	1	29	14	0	28	4	1	0	0	0	0	0	0	1	3	3	0	0	0	0	0	0	1	NA	NA	NA	0.51	110.23	37.66	22.61	14.5	10	9.7	7.9	10.5	324	149	137	230	684	158	50	60	83	121	4.2	2.1	2.6	3.8
531	1	54	42	0	20	4	0	1	0	0	0	0	1	1	3	3	0	0	0	0	0	0	0	0	0	NA	276.88	189.92	158.18	89.42	10.6	12	9.7	7.8	9.6	575	474	407	342	474	114	105	39	82	127	3.4	1.5	2.7	2.5
532	1	77	36	0	17	2	0	0	1	0	0	1	1	2	3	6	1	0	1	0	0	0	0	0	0	NA	30.44	67.05	225.97	178.29	13	8.7	10.2	6.8	10.8	417	167	78	103	176	174	52	36	77	70	3.3	1.2	2	3
533	2	76	32	0	NA	3	0	0	0	0	0	0	0	2	3	3	0	0	1	0	0	0	0	NA	1	NA	68.46	66.22	50.89	6.72	9.8	8.8	10.8	8.9	9.8	NA	794	602	633	654	90	74	60	71	84	NA	2.8	2.1	2.6
534	1	35	8	0	NA	2	0	0	0	0	0	0	0	1	4	4	0	0	0	0	0	0	0	0	NA	146.26	140.57	154.34	166.29	34.85	14.7	12.7	12.3	12.7	12.1	259	217	213	318	426	152	103	94	109	141	4.2	3	2.8	3.3
535	1	71	14	1	34	5	1	0	0	0	0	0	0	2	3	3	0	0	0	1	0	0	0	0	0	99.75	96.09	106.94	144.28	139.17	9.8	12.1	10	7.7	7.4	130	102	32	34	34	120	55	71	73	79	3.2	3	2.6	3
536	2	47	28	0	26	4	0	0	1	0	0	0	1	1	4	6	0	0	1	0	1	0	0	0	1	137.89	169.71	246.41	219.62	79.7	11.4	11.4	10.8	7.9	8.2	295	283	228	160	208	157	116	68	100	76	2.9	2.4	2.2	2.8
537	2	34	20	0	NA	2	0	0	0	0	0	0	0	4	4	4	0	0	0	0	0	0	0	0	NA	NA	NA	20.26	23.02	NA	10	11.6	12.3	9.7	10.2	NA	523	517	327	308	160	111	90	92	89	NA	3.2	NA	2.7
538	1	78	10	0	14	3	0	0	1	0	0	0	0	1	4	4	0	0	0	0	0	0	0	0	1	4.54	41.1	165.27	22.77	18.85	15.9	13	14	10.9	11.8	157	118	130	131	162	133	73	73	118	125	4.1	2.6	2.8	2.6
539	2	35	11	0	NA	2	0	0	0	0	0	0	0	1	4	4	0	0	0	0	0	0	0	0	0	NA	23.46	142.1	NA	125.97	11	10.6	8.7	7.4	10.5	NA	209	159	163	335	168	139	91	93	158	NA	3.9	2.8	3
540	1	61	11	0	21	4	0	0	1	0	0	0	1	1	3	5	0	0	0	0	0	0	0	0	1	45.57	NA	282.88	261.11	139.76	13.9	11.5	10.8	11.6	11.5	352	314	280	191	513	174	114	81	96	116	4.1	2.2	2.9	2.9
541	1	48	29	0	11	2	0	0	1	0	0	0	1	1	3	5	0	0	0	0	0	0	1	0	1	72.94	176.98	248.94	269.91	101.68	13.3	10.5	11.6	9.3	12.7	260	155	167	172	250	125	110	59	75	91	2.9	1.9	2.6	3.1
542	2	60	11	0	15	3	0	0	0	0	1	0	0	1	4	1	0	0	0	0	0	0	0	0	1	NA	407.05	263.89	224.77	149.17	13	10.8	10.3	8.8	9.1	192	181	196	190	296	161	108	101	137	103	3.4	2.4	2.9	2.8
543	1	43	22	0	NA	3	1	0	0	0	0	0	1	2	4	4	0	0	0	0	0	0	0	NA	NA	3.97	NA	NA	149.72	73.46	10	10.8	10	9.3	9.6	245	372	381	336	415	168	125	83	98	134	3.3	3.3	2.3	2.5
544	2	47	33	0	NA	3	0	0	0	0	0	1	1	4	3	5	0	0	0	0	0	0	0	0	NA	NA	NA	NA	NA	NA	12.3	11.1	9.8	10.1	11	NA	289	296	264	346	150	111	77	108	87	NA	3	2.5	2.9
545	2	67	39	0	NA	2	0	0	0	0	0	0	1	2	3	5	0	0	0	1	0	0	0	0	NA	NA	NA	NA	NA	NA	10.6	9.7	8.1	11.5	11.6	128	80	79	110	103	126	54	54	93	153	2.3	2.5	2.8	2.8
546	1	63	22	0	NA	2	0	0	0	0	0	0	1	1	3	6	0	0	0	0	0	0	0	NA	NA	25.09	NA	NA	221.74	33.72	13.8	11.9	13.4	9.3	9.6	351	311	362	208	290	146	132	98	75	88	4.4	NA	2.6	3.2
547	1	59	65	0	33	4	1	1	1	1	0	0	1	1	3	3	1	1	1	1	1	1	0	1	1	NA	46.38	195.14	313.28	172.89	11.3	11.3	9.1	7.4	8.9	420	67	15	5	39	91	36	51	54	62	2.3	1.3	2.5	2.6
548	1	48	9	0	NA	2	0	0	1	0	0	0	0	1	4	6	0	0	1	0	0	0	0	NA	NA	69.18	NA	NA	NA	NA	14.7	13.6	11.7	11	12.8	263	276	238	265	445	164	126	106	119	128	4.2	3.2	2.9	2.9
549	2	36	12	0	12	2	0	0	0	0	0	0	1	1	4	6	0	0	1	0	0	0	0	0	1	NA	226.01	234.18	NA	NA	6.9	5.9	11.7	7.6	7.7	528	435	313	215	263	100	91	52	69	85	2.5	2.3	1.6	2.3
550	2	71	9	0	NA	2	0	0	0	1	0	0	0	2	3	3	0	0	0	0	0	0	0	NA	NA	NA	102.32	NA	NA	NA	13.1	11.9	12.5	10.5	10.9	299	217	198	212	272	216	195	116	115	107	3.6	2.4	2.9	2.9
551	2	44	20	0	NA	2	0	0	0	0	0	0	1	2	3	5	0	0	0	0	0	0	0	0	NA	NA	NA	NA	30.57	20.03	10.1	9.5	10	8.8	8.2	271	220	245	240	266	186	126	132	141	143	2.4	2.6	NA	3.2
552	1	39	29	0	NA	2	0	0	0	0	0	0	0	2	3	3	0	0	1	0	0	0	0	0	0	NA	0.74	148.09	244.32	122.05	17.8	15.2	14.2	11.3	10.2	245	241	222	188	333	208	113	97	118	159	5.3	3	3.1	2.8
553	1	62	12	0	NA	3	0	0	0	0	0	1	0	1	2	1	0	0	0	0	0	0	0	NA	NA	0.74	148.09	244.32	120.82	105.4	17.8	14.2	11.3	11	10.2	245	222	188	227	333	225	196	165	175	185	5.3	3.1	2.8	3.4
554	2	54	17	0	NA	2	0	0	0	0	0	0	1	1	3	3	0	0	0	0	0	0	0	0	1	126.52	NA	120.49	NA	NA	12.1	12.1	12.7	10.7	12.1	249	250	264	274	513	166	111	90	102	167	NA	2.7	3.1	3
555	1	73	24	0	NA	2	0	0	1	0	0	0	0	1	3	1	0	0	0	0	0	0	0	0	NA	NA	2.29	NA	NA	NA	12.7	15.6	11	11.8	12.1	255	242	148	161	243	115	109	79	103	121	3.9	3.4	3	3.3
556	1	64	7	0	NA	3	0	0	0	0	0	0	0	1	4	1	0	0	1	0	0	0	0	0	NA	NA	204.15	123.54	50.34	18.98	13.4	13.1	13	12.4	12.8	266	277	288	354	385	196	180	174	172	190	3.3	3	2.9	3
557	1	28	8	0	NA	2	0	0	0	0	0	0	0	1	3	3	0	0	0	0	0	0	0	0	0	NA	NA	39.45	48.21	16.28	11.9	11.4	10.7	11.4	12.6	344	372	356	300	398	132	91	79	95	125	3.2	2.8	2.8	3.3
558	1	72	15	0	16	3	0	0	1	0	0	0	1	2	4	4	0	0	0	0	0	0	0	1	1	69.6	86.6	132.25	94.13	NA	8.8	9.3	10.1	7.3	8.7	9.5	9.1	7.8	8.6	8.7	107	98	41	47	87	2.8	2.6	1.9	2.6
559	1	50	14	0	NA	1	1	0	0	0	0	0	1	4	4	5	0	0	0	0	0	0	0	NA	1	72.22	55.08	206	144.47	71.29	12.4	11.7	10.1	10.6	11.9	226	241	220	276	663	124	128	65	95	94	3.2	2.5	2.8	3
560	1	77	32	0	30	3	1	1	1	0	0	0	1	1	3	3	0	0	0	0	0	0	0	0	1	NA	40.55	67.98	274.93	171.11	14.4	12.1	11.7	11.4	10.3	506	338	348	215	217	143	56	38	53	69	3.7	1.7	2.8	2.5
561	2	87	25	1	47	3	1	1	1	0	0	0	1	1	4	5	0	0	0	1	1	0	0	0	0	NA	43.78	NA	279.25	31.02	12	12.4	11.9	10.6	13	NA	430	66	102	86	116	107	27	56	54	NA	2.3	2.9	2.9
562	1	73	45	0	40	4	1	1	1	1	0	1	0	1	3	4	0	0	1	1	1	0	0	0	1	NA	259.13	222.76	173.17	106.47	12	11.2	10.8	12.8	10.4	NA	300	215	147	72	110	70	50	52	46	NA	1.9	2.5	2.1
563	1	73	23	0	NA	2	0	0	0	0	0	0	1	3	4	4	0	0	1	0	0	0	0	0	NA	135.21	277.94	277.84	253.41	72.05	8.5	7.7	7.9	8.3	8.3	159	170	120	198	341	85	78	41	76	119	2.8	1.6	2.9	2.7
564	1	76	13	0	16	4	0	0	1	0	0	0	1	1	3	3	0	0	1	0	0	0	0	0	NA	NA	NA	NA	NA	NA	13	13.9	11.1	10.8	11.4	NA	263	166	125	188	132	102	52	58	73	NA	3.6	3	2.7
565	2	53	10	0	NA	1	1	0	0	0	0	0	0	1	2	1	0	0	1	0	0	0	0	NA	NA	NA	1.56	NA	NA	NA	15	16.2	13.7	9.6	10.3	NA	525	428	286	454	198	178	98	110	130	NA	4.2	2.9	3
566	1	80	9	0	16	3	0	0	1	0	0	0	0	1	4	6	0	0	0	0	0	0	1	0	NA	5.33	109.34	234.11	66.96	100.04	13.4	11.6	8.6	8.9	8.6	202	137	106	145	215	188	112	68	94	112	3.8	2.4	3.1	2.7
567	1	59	13	0	NA	3	0	0	0	0	0	0	1	2	3	1	0	0	0	0	0	0	0	0	NA	NA	76.63	NA	NA	24.92	11.2	8.8	7.9	8	8.5	502	351	345	341	363	174	117	110	111	124	3.1	2.3	2.6	2.7
568	1	76	12	0	10	3	0	0	1	0	0	0	1	1	4	6	0	0	0	0	0	0	0	NA	0	NA	17.9	161.47	261	99.83	14.1	11.7	10.7	8.9	11.4	260	204	191	214	374	260	164	137	155	240	4.4	2.6	3.2	2.9
569	1	31	23	0	9	2	0	0	0	1	0	0	0	2	4	1	0	0	0	0	0	0	0	0	NA	101.78	200.25	214.91	230.08	28.83	12	12.8	11.8	8.1	10.5	182	191	163	143	247	134	97	51	69	80	3.9	2.2	2.9	2.7
570	2	68	67	0	45	4	1	1	1	0	0	0	1	1	3	5	0	0	1	1	1	1	0	0	1	NA	120.36	122.32	162.89	108.83	8.5	8	8.9	7.1	7.4	23	24	32	32	21	77	66	52	63	75	2.7	2.2	2.8	2.8
571	1	67	8	0	NA	2	0	0	0	0	0	0	1	2	4	4	0	0	0	0	0	0	0	NA	NA	NA	NA	25.82	NA	NA	14	13.8	13	12.6	12.4	NA	335	305	309	357	170	162	140	139	148	NA	3.6	3.1	3.3
572	1	67	28	0	39	5	1	1	0	0	0	0	0	1	1	1	0	0	0	1	1	0	0	0	0	NA	450.36	284.96	NA	91.59	11.3	11.2	11.3	10.4	7.8	667	291	313	185	204	91	76	59	83	61	2.1	2.3	2.2	2.4
573	1	61	7	0	12	3	0	0	1	0	0	0	0	1	4	4	0	0	0	0	0	0	0	NA	NA	NA	111.24	NA	NA	NA	15	13.9	11.3	12.3	13	NA	122	106	119	NA	232	200	143	146	149	NA	3.5	3.2	3.4
574	1	50	21	1	31	3	1	0	1	0	1	0	0	1	3	3	1	0	1	1	1	1	0	0	0	NA	94.92	NA	NA	NA	9.5	9	9.4	6	6.8	244	221	219	77	22	78	46	31	34	59	2.6	1.6	2.6	2.8
575	2	57	69	0	NA	3	0	0	0	0	0	0	1	1	4	5	0	0	1	0	0	0	0	0	1	NA	NA	NA	NA	NA	11	9.4	8.8	7.9	8.8	NA	592	608	571	667	110	91	81	100	114	NA	2.4	2.2	2.5
576	1	36	17	0	NA	4	1	1	0	0	1	0	0	1	3	3	0	0	0	0	0	0	0	0	0	NA	98.25	NA	NA	NA	12.6	13.9	12.1	9.6	8.5	252	200	183	141	355	162	128	71	109	89	4.2	2.5	2.6	3.4
577	1	49	27	1	27	4	0	1	0	0	0	0	1	1	4	6	0	0	0	0	1	0	0	1	1	115.72	192.4	288.63	210.29	143.82	12.2	11.8	10.2	10.3	10.1	154	81	72	21	60	91	42	50	46	51	2.2	1.9	2.5	2.5
578	1	67	14	0	NA	3	0	0	0	1	0	1	1	2	1	2	0	0	0	0	0	0	0	NA	NA	NA	NA	NA	NA	NA	11.1	10.2	8.2	11	12.7	284	269	228	197	283	107	74	49	63	96	3.3	2.1	3.4	2.7
579	1	54	36	0	17	3	1	0	1	0	0	0	1	4	4	5	0	0	0	0	1	0	0	0	NA	NA	230.96	299.09	294.39	156.08	7.9	7.9	8.9	8.7	7.8	202	196	120	131	256	105	69	34	53	62	2.3	2	2.9	3.4
580	1	45	10	0	NA	4	0	0	0	0	0	0	0	1	3	1	0	0	0	0	0	0	0	0	0	27.61	23.15	96.81	NA	56.9	11.6	11.3	14.2	11.4	10.9	437	415	392	365	376	108	39	46	76	104	3.5	3.1	3.2	3
581	2	82	9	0	NA	3	0	0	1	0	0	0	1	1	4	4	0	0	0	0	0	0	0	0	NA	1.33	125.61	127.4	55.71	NA	10.3	9.7	9.2	10	10.6	223	189	169	204	188	238	215	178	149	150	4	3.6	3.4	3.6
582	1	59	8	0	NA	3	0	0	0	0	0	0	1	1	4	1	0	0	0	0	0	0	0	0	0	NA	NA	212.88	81.82	45.09	16.4	16	14.2	13.8	12.5	206	175	196	317	383	173	132	118	127	142	3.9	2.7	2.8	3
583	2	79	10	0	31	4	0	1	1	0	0	0	0	1	4	6	0	0	0	0	0	0	1	0	1	NA	282.31	NA	NA	35.27	12.1	13.8	10.8	9.5	9.1	224	189	171	116	253	97	42	32	56	81	3.6	1.6	2.5	2.6
584	1	64	33	0	NA	3	0	0	1	1	0	0	1	1	4	5	0	0	0	0	0	0	1	1	1	143.16	191.99	290.49	224.2	89.31	11.2	11.5	9	8.8	8.6	484	544	506	584	568	170	141	132	123	89	3.1	3.4	2.5	2.9
585	1	77	41	0	33	4	1	1	0	0	0	0	1	1	3	3	0	0	0	0	1	0	0	0	1	NA	NA	116.23	196.27	88.41	14.9	15.4	11.6	8.5	8.9	298	158	53	89	40	164	99	23	19	45	3.9	1.3	2.2	2.4
586	2	79	9	0	16	3	0	0	1	0	0	0	0	2	3	3	0	0	0	0	0	0	0	NA	NA	NA	NA	1	NA	NA	12.6	12.1	10.7	10.3	10.2	NA	263	251	236	305	145	136	90	80	68	NA	4	2.9	3.2
587	2	40	13	0	NA	3	0	0	0	0	0	0	0	1	2	1	0	0	0	0	0	0	0	NA	NA	NA	17.33	154.22	NA	6.02	14.5	12.3	10.5	10.5	10.5	278	195	185	242	344	260	189	178	185	200	4.6	3.6	3.1	3.1
588	2	45	18	0	29	3	1	0	0	1	0	0	1	1	4	4	0	0	0	0	0	0	1	0	0	NA	119.78	159.31	165.38	25.27	10.1	9	9	9.3	8.1	NA	380	174	117	198	198	184	100	120	104	NA	3.7	2.5	2.8
589	1	76	22	0	18	4	0	0	1	1	0	0	0	3	3	3	0	0	1	0	1	1	0	0	NA	NA	NA	NA	NA	NA	8.5	10.2	9.2	9	9.3	67	44	66	102	241	37	40	43	72	136	2.1	3.3	2.4	2.4
590	1	73	20	0	11	2	0	1	0	0	0	0	1	1	3	3	0	0	1	0	1	0	0	0	NA	136.7	274.64	262.95	227.97	NA	13.3	11.6	9.8	8	8.1	123	113	105	109	315	114	73	50	62	101	3.1	2.4	1.6	2.5
591	1	81	15	0	13	3	0	0	0	0	0	0	0	4	3	3	0	0	0	0	1	0	0	NA	NA	69.23	90.57	NA	NA	NA	14.1	14	14.4	12.5	12.3	268	265	289	276	290	181	174	140	140	135	3.3	3.1	3.3	3.3
592	1	58	22	0	NA	1	0	0	0	0	0	0	0	1	2	1	0	0	0	0	0	0	0	0	NA	51.01	NA	256.63	137.85	16.14	14.2	13.7	14.1	14.3	13	226	227	248	351	471	175	175	149	144	164	3.7	3.9	3.2	3.5
593	2	48	8	0	NA	2	0	0	0	0	0	0	1	2	3	3	0	0	0	0	0	0	0	0	NA	NA	NA	NA	NA	NA	11.4	12.4	11	10.7	10.6	364	350	334	255	244	111	89	66	57	102	3.5	3.2	2.8	3.8
594	1	74	13	0	33	3	0	1	1	1	0	0	1	1	4	6	0	0	0	0	0	0	0	0	1	147.42	NA	312.03	NA	NA	13.1	12.9	12.4	9.1	8.9	386	375	394	289	319	104	48	42	69	66	3.2	2.7	2.5	2.7
595	2	27	19	0	25	3	0	0	0	0	0	0	0	4	4	4	0	0	0	0	0	0	0	0	0	NA	NA	NA	NA	NA	11.4	13.8	9.3	8.6	8.9	424	267	188	164	192	27	49	36	72	77	2.4	1.4	2.8	2.1
596	1	88	9	0	27	3	0	0	1	1	0	0	1	2	3	3	0	0	0	0	0	0	0	NA	NA	NA	1.91	15.43	NA	NA	13	13.3	9.8	8.4	8.3	NA	211	122	109	147	283	222	104	97	128	NA	3.7	2.6	2.8
597	1	51	4	0	NA	4	0	0	0	0	0	0	0	1	1	1	0	0	0	0	0	0	0	0	NA	NA	24.27	80.59	165.33	NA	14	14.1	12.3	10.1	11	NA	295	262	392	NA	455	455	270	267	254	NA	3.8	3.1	3
598	2	83	23	0	34	3	0	0	0	1	0	0	0	1	2	1	0	0	0	0	0	0	0	0	NA	63.55	93.53	225.08	251.1	139.16	16.6	11.5	8.8	8.3	10.1	247	159	140	124	269	144	55	48	86	132	3.5	1.8	3.3	2.8
599	2	56	39	0	NA	3	0	0	1	0	0	0	1	1	3	1	0	0	0	0	0	0	0	0	1	87.22	94.37	227.48	100.4	55.29	10.8	11.6	10.2	11.8	12.7	275	332	326	346	412	126	116	97	117	148	2.4	2.5	2.6	3
600	1	55	16	0	22	3	0	0	0	0	0	1	0	2	3	3	0	0	0	0	0	0	0	0	NA	NA	114.57	NA	262.21	56.47	12	11.8	10.8	8.5	8.3	NA	483	386	399	498	189	155	98	97	143	NA	3.9	2.7	2.8
601	1	49	15	0	22	4	0	0	1	0	0	0	1	1	3	5	0	0	0	0	1	0	0	0	0	226.86	232.35	100.32	128.89	75.48	15	12.7	9.8	9.3	8.3	119	91	59	72	128	186	130	54	72	67	3.8	2.2	2.9	2.6
602	1	60	93	1	26	4	0	0	0	0	0	0	0	1	4	4	0	0	0	1	1	0	0	0	NA	118.83	NA	NA	63.71	251.16	8.4	7.9	7.2	9.7	8.4	37	38	28	55	8	145	93	97	110	59	2.1	2.3	2.9	3.1
603	1	57	4	0	NA	2	0	0	0	0	0	0	0	2	3	1	0	0	0	0	0	0	0	NA	NA	0.81	2.88	28.54	NA	NA	15.6	14.6	12.4	13	13	229	252	203	NA	NA	245	251	183	178	170	4.5	4.4	3.3	NA
604	2	47	24	0	NA	2	0	0	0	0	0	0	1	2	3	3	0	0	0	0	0	0	0	NA	NA	NA	NA	86.36	NA	15.28	13	12.2	10.6	10	9.3	NA	228	207	NA	302	128	98	94	102	150	NA	2.6	2.6	NA
605	2	26	11	0	NA	4	0	0	0	0	0	0	0	1	3	3	0	0	0	0	0	0	0	0	0	1.95	NA	NA	NA	NA	14.2	12.4	7.6	6.9	9.5	456	396	230	152	NA	84	76	24	53	80	2.9	1.6	2.5	2.8
606	2	41	73	0	29	4	0	0	0	0	0	0	1	2	3	3	0	0	0	0	0	1	0	0	0	241.35	230.86	155.75	NA	NA	10	7.5	8.4	8.2	9	27	26	31	25	22	113	110	108	127	116	2.5	2.8	2.8	2.9
607	2	50	37	0	30	2	1	1	0	0	0	0	1	1	4	1	0	0	0	0	0	0	0	0	1	NA	271.53	255.85	90.9	41.96	11.9	11.6	10.4	10	11.2	217	210	210	238	374	290	198	200	190	212	NA	2.8	3.3	3.7
608	2	67	18	0	NA	3	0	0	1	1	0	0	1	2	3	3	0	0	0	0	0	1	0	0	1	61.36	133.56	141.13	77.91	33.52	8	11.5	9.5	9.9	10.1	259	203	236	336	403	60	57	46	88	147	2.2	2.2	2.6	2.4
609	1	40	7	0	11	3	0	0	0	0	0	0	1	2	3	3	0	0	0	0	0	0	0	NA	NA	6.51	NA	134.18	NA	51.63	10	9.2	9.5	9.4	8.5	301	292	313	249	288	75	68	64	69	84	2.9	2.6	3	3
610	1	69	6	0	NA	2	0	0	0	0	0	0	0	2	3	3	0	0	0	0	0	0	0	NA	NA	NA	NA	NA	NA	NA	17.5	16.1	11.5	10.4	10.7	209	205	227	NA	NA	155	146	100	124	132	4.2	3.7	3.1	3.2
611	1	65	7	0	NA	2	0	0	0	0	0	0	1	1	1	2	0	0	0	0	0	0	0	0	NA	NA	2	NA	NA	NA	12.1	8.6	7.4	6	9	583	547	424	399	327	198	101	89	92	90	3.9	2.2	2.8	2.7
612	1	54	8	0	NA	2	0	0	0	0	0	0	1	1	4	5	0	0	0	0	0	0	0	0	1	293.2	297.5	287.3	116.9	89.7	10.2	10.6	11.4	9.4	8.9	221	296	354	409	686	120	79	92	82	121	3.3	2.5	2.8	2.4
613	1	41	22	0	NA	2	0	0	0	0	0	0	1	2	4	4	1	0	0	0	0	0	1	NA	NA	NA	NA	71.5	215.5	42.3	14.1	13.4	11.4	12.7	12.6	231	215	210	250	289	232	218	161	166	186	3.7	2.9	3.2	3.5
614	1	74	55	0	33	4	0	0	1	1	0	0	1	1	4	6	1	1	0	0	1	1	1	NA	1	NA	NA	327.9	157.8	92.6	12.6	12	13.3	10.5	9.6	221	199	63	47	54	91	90	39	50	63	3.2	1.3	2.3	2.2
615	2	38	11	0	NA	3	0	0	0	0	0	0	0	1	4	6	0	0	0	0	0	0	0	0	NA	3.96	27.24	111	140.6	16.4	11.8	11.4	11.6	9.7	10.1	315	236	288	216	314	204	106	99	94	125	4.3	2.4	2.7	3
616	1	57	18	0	28	3	0	0	0	0	0	0	1	1	4	1	0	0	0	0	0	1	0	1	1	51.94	136.41	NA	NA	70.79	9.8	9.2	8.5	7.9	8.6	265	118	84	76	187	77	56	42	50	70	2.6	2	2.5	2.5
617	2	79	12	0	NA	2	0	0	1	1	0	0	1	2	3	1	0	0	0	0	0	0	0	0	NA	25.64	NA	NA	135.78	53.66	12.3	12.8	10.4	9.7	11.4	248	225	200	202	293	134	77	72	78	102	3.5	2.2	2.3	2.8
618	1	60	57	1	29	3	0	0	0	0	0	0	1	2	3	5	0	1	0	1	0	0	0	0	1	134.49	154.78	321.99	410.81	230.32	10.9	10.8	9.4	10.2	9.5	414	319	241	203	312	186	165	132	63	64	3.1	2.2	2.1	2.8
619	2	26	7	0	NA	2	0	0	0	0	0	0	0	1	1	1	0	0	0	0	0	0	0	NA	NA	NA	19.23	NA	NA	NA	14.4	12.9	12.9	12.1	12	218	150	185	170	NA	126	97	88	101	112	4.2	3.3	3	3.1
620	1	26	8	0	NA	3	0	0	0	0	0	0	0	1	3	3	0	0	0	0	0	0	0	0	NA	219.93	74.45	NA	NA	NA	14.7	14	13.7	12.8	12	331	281	295	339	NA	140	140	118	139	145	3.6	2.8	3.1	2.8
621	1	69	12	0	NA	2	0	0	0	0	0	1	0	1	2	2	0	0	0	0	0	0	0	NA	NA	11.2	148.8	259.35	218.22	99.98	16.3	14.3	14	12.2	11.5	223	204	228	252	360	209	101	95	140	133	3.9	2.6	2.6	2.7
622	2	64	39	0	13	4	0	0	1	1	1	0	0	3	4	6	0	1	1	0	0	1	0	0	0	24.06	NA	290.82	192.13	61.55	13.7	9.6	9.6	8.5	8.8	121	104	119	114	131	138	104	57	69	100	4.2	2.1	2.9	2.4
623	2	47	11	0	NA	2	0	0	0	0	0	0	1	2	3	5	0	0	0	0	0	0	0	NA	NA	41.13	NA	67.89	NA	35.76	9.6	8.5	8.9	8.9	8.7	351	280	NA	360	349	225	136	120	160	185	3.3	2.4	2.4	2.5
624	1	82	5	0	NA	2	0	0	1	0	0	0	0	1	3	3	0	0	0	0	0	1	0	0	NA	NA	284.82	239.48	NA	NA	13.4	12.6	12	12.1	13	214	190	NA	305	NA	221	191	160	186	187	3.8	2.9	NA	3.2
625	1	60	71	0	NA	3	0	0	1	0	0	1	1	2	3	1	0	1	0	1	0	0	1	NA	NA	NA	35.77	NA	NA	NA	10.6	10.2	10.5	8.6	8.7	301	257	282	233	204	89	87	49	47	73	2.7	2.1	2.5	3.1
626	2	50	30	0	21	2	0	0	0	0	0	0	0	1	4	1	0	0	0	0	1	0	0	0	1	33.19	219.53	285.85	299.69	86.85	13	11.5	11	10.3	12.5	200	123	115	110	496	156	85	74	80	128	3.8	2.3	3	3
627	1	58	9	0	NA	2	0	0	0	0	0	0	1	1	4	4	1	1	0	0	0	0	0	0	0	147.76	195.34	288.9	78.2	30.8	8.7	9.8	8.2	8.1	9.7	505	569	566	541	555	142	159	120	128	141	2.5	2.1	2.6	2.6
628	1	48	22	0	NA	3	0	0	0	0	0	0	1	1	4	1	1	1	0	0	0	0	0	NA	NA	123.64	NA	94.51	58.62	63.32	11.1	10.4	10.9	11.1	9.8	116	138	209	223	253	88	100	104	114	111	3	2.9	3.3	3.3
629	1	71	19	0	9	3	0	0	0	0	0	1	0	1	4	6	0	0	0	0	0	0	1	0	NA	277.07	202.31	225.26	79.06	44.07	10	10.7	9.6	9.9	10.2	391	350	327	350	590	121	93	60	78	120	2.7	3.1	2.4	2.5
630	2	78	147	0	13	4	0	0	0	1	0	0	1	2	3	3	1	1	1	1	1	0	0	0	0	167.8	195.04	202.87	223.66	147.2	8.8	11.9	8.6	8.6	9.2	236	114	114	160	254	166	154	59	94	128	3.1	3.3	2.9	3
631	1	51	30	0	NA	2	0	0	0	0	0	0	1	1	2	1	1	1	1	0	0	1	0	NA	NA	NA	NA	NA	96.98	NA	10.5	13.2	13	12.1	10.6	206	187	155	150	204	34	41	57	44	41	3.3	3.2	3	3
632	2	87	11	0	9	2	0	0	1	1	0	0	0	1	4	6	0	0	0	0	0	0	0	0	1	1.15	113.44	246.52	128.3	23.53	13.5	11.2	11.1	10.7	10.5	331	261	207	224	329	177	99	95	125	171	3.6	2.6	2.8	2.9
633	1	28	62	0	12	3	0	0	0	0	0	0	0	1	4	6	0	0	0	0	0	0	0	0	1	NA	NA	60.86	NA	71.25	9.4	11	9.3	9	8.7	797	444	420	NA	176	33	28	37	52	78	NA	2.7	3.1	3.3
634	1	67	17	0	NA	4	0	0	0	0	0	1	1	2	4	6	0	0	0	0	0	0	0	0	1	NA	212.1	NA	NA	47.49	12	11.8	13.6	12	10.4	435	376	343	NA	417	252	222	232	100	99	3.2	3	2.3	NA
635	1	65	9	0	NA	3	0	0	0	0	0	0	1	2	3	1	0	0	0	0	0	0	0	NA	NA	NA	1.04	12.99	61.97	NA	12.5	12.2	11.5	10	10	244	219	225	209	NA	153	164	149	138	151	4.4	3.9	3.5	3.2
636	1	31	15	0	NA	2	0	0	0	0	0	0	1	2	4	4	0	0	0	0	0	0	0	0	NA	36.72	37.17	191.8	NA	55.29	10.6	10.5	9.2	9.5	9.6	615	516	490	523	707	221	209	163	123	157	3.6	2.7	2.8	2.9
637	2	81	124	0	27	4	0	0	1	0	0	0	0	1	4	6	0	1	0	0	1	1	0	0	1	119.31	275.48	305.32	253.42	122.47	11.3	12.1	9.8	9	8.7	462	289	212	164	236	48	51	44	43	80	2.7	2.6	2.4	2.5
638	1	64	20	0	NA	1	0	0	1	0	0	0	1	2	3	5	0	0	0	0	1	0	0	0	0	NA	NA	NA	138.7	122.5	9.6	10.4	10	10.4	11.2	507	457	419	363	347	219	117	96	102	135	2.7	1.4	2	2
639	2	71	12	0	17	4	0	0	1	1	0	0	1	3	4	6	0	0	0	0	0	0	0	0	1	98.96	240.41	373.43	245.58	NA	11.2	9	7.6	10	12.3	353	239	201	124	140	161	91	65	95	112	4.1	2.7	2.7	2.7
640	1	44	7	0	NA	3	0	0	0	0	0	0	0	1	3	3	0	0	0	0	0	0	0	NA	NA	70.13	NA	56.89	96.01	34.62	8.3	9.8	10.2	8.6	8.5	344	302	342	303	397	145	74	93	77	92	2.5	2.2	2.2	2.9
641	1	35	51	0	14	4	1	0	0	0	0	1	0	1	3	3	0	1	0	1	0	0	0	0	1	121.31	NA	87.75	82.3	67.51	7.5	8.4	9.3	8.5	8.7	300	130	160	223	269	58	74	43	70	88	1.7	2.4	2.3	2.5
642	1	50	12	0	29	3	0	0	1	0	1	0	0	1	4	4	0	0	0	0	0	1	0	0	0	87.64	NA	275.4	69.59	20.1	10.7	8	7.7	10.3	10.5	152	152	124	114	225	127	106	56	77	109	2.8	2.8	2.5	2.7
643	1	72	8	0	11	2	0	0	1	0	0	0	0	2	3	1	0	0	0	0	0	0	0	NA	NA	NA	NA	42.68	NA	NA	13	13	12.3	11	13	125	140	118	129	174	116	96	93	113	149	3.8	3	3.1	3.1
644	1	57	23	0	15	2	0	0	0	0	0	0	1	1	4	5	0	0	1	0	0	0	0	NA	NA	189.23	196.19	NA	NA	NA	12.8	11.3	10.4	9.8	9.1	238	194	233	243	322	217	198	106	100	117	3.3	1.9	3	2.8
645	1	56	19	0	NA	2	0	0	1	0	0	0	1	2	3	3	0	1	1	0	0	0	0	0	1	11.03	9.76	86.14	146.68	27.59	14	12.8	11.3	10.2	9.6	375	316	305	278	433	164	133	84	95	133	4.3	2.6	2.8	3.1
646	2	68	32	0	36	3	0	0	0	0	0	0	1	1	1	1	0	1	0	0	0	0	0	NA	1	NA	62.73	103.43	132.24	89.06	9.6	7.4	6.6	8.6	9.1	175	126	83	80	88	109	94	52	63	60	2.5	2	2.4	2.9
647	2	59	15	0	NA	2	0	0	0	0	0	0	1	1	4	6	0	1	0	0	0	0	0	0	1	118.11	170.85	245.82	108.66	117.7	11.5	10.8	9.7	9.8	10	348	337	275	388	565	170	139	80	101	170	3.9	2.2	2.4	3.2
648	2	68	7	0	8	3	0	0	0	0	0	0	1	2	3	3	0	0	0	0	0	0	0	NA	NA	NA	11.64	20.3	NA	NA	8.8	10.6	10.4	8.4	9	255	246	238	201	NA	87	92	74	92	106	2.8	2.5	2.7	2.6
649	1	48	218	0	25	3	1	1	1	1	0	0	1	1	3	1	0	1	0	0	1	1	0	0	1	159.28	NA	NA	NA	NA	9.8	6.4	14.5	12.5	10.9	359	268	149	152	153	66	49	45	36	58	2.4	1.5	3.3	3.1
650	2	72	11	0	NA	3	0	0	0	0	0	0	1	1	4	6	0	0	1	0	0	0	0	NA	1	NA	207.41	234.08	NA	115.36	10.3	10.7	8.9	10.2	8.9	156	70	81	104	346	110	45	42	86	90	2.8	1.7	3.1	3
651	2	45	7	0	NA	2	0	0	0	0	0	0	1	2	4	1	0	0	0	0	0	0	0	NA	NA	0.43	NA	NA	NA	NA	6.2	8.7	8	8.4	9.2	355	322	282	294	314	141	131	121	129	119	4.2	3.9	3.3	3.5
652	1	69	7	0	NA	2	0	0	0	0	0	0	1	2	3	3	0	0	0	0	0	0	0	NA	NA	11.68	NA	113.5	147	NA	14.8	14.2	14	12.7	12	201	164	162	194	NA	172	134	129	155	140	4	3.1	3.1	3.2
653	2	32	8	0	NA	2	0	0	0	0	0	0	0	2	3	3	0	0	0	0	0	0	0	NA	NA	2.24	NA	19.5	93.39	44.39	12.1	11.7	11.1	10.4	11.1	146	127	122	109	200	128	108	98	98	136	3.9	3.5	3.2	2.9
654	2	52	6	0	NA	1	0	0	0	0	0	0	1	1	4	4	0	0	0	0	0	0	0	NA	NA	NA	NA	79.66	89.28	29.58	13.3	12.3	12.2	10.2	12.2	205	172	174	159	234	285	179	187	166	179	4.6	2.7	2.8	2.7
655	1	83	7	0	NA	3	0	0	1	1	0	0	0	2	3	3	0	0	0	0	0	0	0	0	NA	NA	240.29	306.52	108.38	NA	12.2	10.7	10.3	10.9	11	170	141	113	142	NA	99	72	70	115	122	2.8	2.2	2.5	2.5
656	1	31	7	0	NA	2	0	0	0	0	0	0	0	1	3	2	0	0	0	0	0	0	0	0	0	133.25	188.29	208.53	NA	NA	16.8	15.2	15	14.3	14	299	251	236	263	NA	203	166	153	154	155	4.2	3.3	3.1	3
657	1	59	6	0	NA	2	0	0	1	0	0	0	0	1	4	4	0	0	0	0	0	0	0	NA	NA	NA	100.31	NA	NA	NA	15.7	14	14.7	12.8	12.7	154	NA	149	138	202	112	108	87	79	87	4.3	NA	3.3	2.8
658	1	44	34	0	NA	4	1	1	0	0	0	0	1	2	3	5	0	0	0	0	0	1	1	0	0	NA	12.16	NA	222.35	163.73	14.2	10.7	8.5	9.2	9.1	304	94	72	65	63	145	100	111	99	98	2.4	3.4	3.2	2.5
659	2	75	27	0	16	2	0	0	1	0	0	0	1	1	3	3	1	1	1	0	0	0	0	0	1	184.4	194.7	160.08	114.47	42.08	7.9	11	8.8	8.5	10.2	83	65	55	96	205	50	73	49	46	43	2.5	1.8	2.7	2.7
660	2	81	16	0	NA	3	0	0	0	1	0	1	1	2	3	3	0	0	0	0	1	0	0	NA	NA	NA	NA	NA	NA	NA	11.4	12.1	11.2	9.7	10.6	175	156	167	140	161	175	134	107	114	130	4	3	2.9	2.3
661	1	58	11	0	NA	2	0	0	0	1	0	0	1	2	3	5	0	0	0	0	0	0	0	NA	NA	NA	46.26	NA	NA	NA	13.8	12.8	13	8.9	9.4	832	812	741	536	718	138	137	114	101	142	4.4	3.5	3.4	2.5
662	1	72	6	0	17	2	0	0	0	0	0	1	0	1	3	3	0	0	1	0	0	0	0	0	0	284.17	NA	314.96	284.26	NA	16.3	15.2	14.1	11.9	12.7	204	197	183	197	271	156	122	98	100	103	3.8	3	2.5	2.7
663	1	67	6	0	NA	2	0	0	0	0	0	0	0	1	3	3	0	0	0	0	0	0	0	NA	0	155.01	227.78	251.59	92.86	NA	15.4	14.5	14	14.1	14	212	167	180	228	NA	210	174	155	157	160	4.1	3.1	3	2.8
664	1	59	15	0	10	3	0	0	1	1	0	0	0	3	4	6	0	0	0	0	1	0	0	0	0	219.9	NA	219.6	202.7	60.8	13.8	13.3	11.3	11.3	10.2	304	240	240	305	421	245	239	125	154	129	3.5	2.5	2.8	2.6
665	1	90	21	0	NA	3	0	0	1	1	0	0	1	2	3	3	0	0	1	0	1	0	0	0	NA	258.3	292.1	361.9	167.1	72.5	17	14.3	11.4	11.3	9.9	215	154	105	86	192	204	164	89	83	132	4.5	2.5	2.7	2.5
666	1	64	4	0	NA	2	0	0	0	1	0	0	1	2	3	3	0	0	0	0	0	0	0	NA	NA	NA	NA	NA	NA	NA	15.8	15.1	13.9	14	12.8	224	181	174	186	186	150	123	108	97	95	4.6	3.9	3.5	3.2
667	2	68	9	0	10	1	0	0	0	0	0	0	1	2	3	3	0	0	0	0	0	0	0	NA	NA	16.9	11.6	41.2	155.2	32.1	9.6	7.9	12.2	9.8	9.9	107	90	100	123	171	113	128	74	102	143	3.5	1.8	3.3	2.8
668	2	78	10	0	NA	1	0	0	0	0	0	0	0	1	4	4	0	0	0	0	0	0	0	NA	NA	NA	57.6	216.1	79.3	12	12.4	11.8	11.7	12.5	11.2	245	196	196	269	249	210	192	149	112	101	3.9	3	2.8	2.5
669	1	62	40	0	NA	2	0	1	0	0	0	0	1	1	4	5	1	1	1	0	0	0	0	NA	1	NA	53.6	89.2	124.5	49.2	10.1	12.1	12.8	9.9	9.9	224	206	244	227	318	94	99	79	75	88	2.9	2.5	2.7	2.9
670	2	32	7	0	NA	2	0	0	0	0	0	0	1	2	3	1	0	0	0	0	0	0	0	NA	NA	36.3	NA	NA	NA	NA	12.3	11.5	8.7	7.4	8	320	242	188	161	211	192	104	83	93	157	4.2	2.3	2.6	3.2
671	1	70	24	0	27	4	1	1	0	0	0	0	0	2	3	5	0	0	0	0	0	0	0	0	0	233.5	NA	334.9	263.1	65.7	14.6	10.7	10	9.6	10	252	121	142	107	293	136	114	87	90	94	3.5	2.2	2.7	2.7
672	2	76	9	0	NA	3	0	0	1	0	0	0	1	2	4	4	0	0	0	0	0	0	0	NA	NA	102.3	NA	95.8	66.5	59.7	8.8	8.8	8	8.4	8.2	330	339	278	310	328	144	124	105	105	137	2.3	2.3	3	2.7
673	1	54	30	0	NA	3	0	0	0	0	0	1	1	2	3	3	0	0	0	0	0	0	0	0	NA	84.6	263.1	259.1	110.9	43.5	14.2	12.4	11.5	12	12.5	208	134	161	198	331	153	129	67	115	167	3.6	2.5	2.8	3
674	1	73	12	0	NA	2	0	0	0	0	0	0	1	2	3	3	0	0	0	0	0	0	0	NA	NA	6	NA	NA	203.8	79.2	13.4	14.6	15.6	11.2	13.5	154	148	173	121	305	137	94	79	83	125	3.5	2.6	2.6	2.7
675	2	83	39	0	15	2	0	0	1	0	0	0	1	2	4	4	1	1	0	0	0	0	0	NA	NA	275.2	127.4	170.6	NA	105.3	7.6	11.2	10.4	9.5	11	206	102	123	70	78	76	88	31	42	65	2.2	1	1.9	2.7
676	1	76	16	1	40	4	1	1	0	0	0	0	1	1	3	1	0	1	0	1	1	1	0	0	1	183.8	NA	NA	NA	NA	11.2	7.5	10.2	9.6	7.9	27	101	55	75	49	107	59	62	48	37	1.8	2.4	3.2	2.9
677	1	63	36	0	23	3	1	1	0	0	0	0	0	1	4	6	0	1	1	1	1	1	0	NA	NA	96.2	143.9	258.5	291.9	97.1	10.3	9.8	9.6	8.8	8.7	123	103	73	38	34	86	61	47	38	65	2.4	2.8	2.8	2.5
678	1	74	9	0	11	3	0	0	0	0	0	1	1	1	4	6	0	0	0	0	0	0	0	NA	NA	NA	85.3	161.9	52.4	19	10.8	10.8	8.7	11.9	11	310	278	186	223	322	162	149	106	84	112	3.5	2.5	2.8	2.7
679	1	30	13	0	8	3	1	0	0	0	0	0	0	3	4	4	1	1	1	0	0	0	0	1	1	NA	NA	162	79.8	135.8	16.9	10.6	9.2	8.9	7.1	272	190	162	201	286	192	86	98	150	91	4.1	2.2	3.2	3.1
680	2	49	20	0	NA	3	0	0	0	0	0	1	1	2	3	5	0	0	0	0	0	0	0	0	0	260.3	NA	234.9	219.5	NA	12.1	11.5	11.2	11.3	11.4	131	134	126	116	297	160	93	100	124	130	1.6	1.8	1.6	1.5
681	2	66	8	0	11	2	1	0	0	0	0	0	1	1	1	1	0	0	0	0	0	0	0	0	0	NA	92.4	139.3	65.5	31.4	7.1	9.3	7.9	8.5	9.6	391	222	211	193	457	94	40	39	68	133	2	1.6	2.7	2.8
682	1	34	6	0	NA	2	0	0	0	0	0	0	0	1	2	1	0	0	0	0	0	0	0	0	NA	NA	NA	48.2	84.9	21.2	15.4	14.2	13.6	12.4	13.1	233	212	206	228	330	210	189	151	151	165	4.4	3.7	3.2	3.4
683	1	60	8	0	NA	2	1	0	0	0	0	0	0	2	3	1	0	0	0	0	0	0	0	NA	NA	NA	114	197.9	81.5	7.7	16	11.4	10.8	8.8	10.6	335	218	213	194	285	143	70	66	101	110	2.9	1.8	2.7	3.4
684	1	74	11	0	NA	2	0	0	1	0	0	0	1	2	4	4	0	0	0	0	0	0	0	NA	NA	NA	NA	45.5	83	NA	11.3	10.9	10	9.8	11.6	166	143	120	130	208	157	171	162	179	167	3.1	3.1	2.8	3
685	2	75	10	0	11	3	0	0	0	0	0	0	1	2	4	6	0	0	0	0	1	0	0	0	NA	NA	49.8	113.9	81.4	33.7	9.4	10.5	7.6	10.2	10	231	386	202	155	208	148	111	65	52	103	NA	1.9	2.2	2.6
686	1	24	25	0	NA	2	0	0	0	0	0	0	0	1	3	3	1	0	0	0	0	0	0	NA	NA	263.3	NA	NA	NA	10.9	7.7	11.3	9.2	10.3	10.9	421	376	399	419	633	72	79	69	79	145	1.9	2	1.9	2.5
687	1	57	40	0	9	2	0	0	1	0	0	0	1	1	4	1	0	1	0	0	0	0	0	0	1	89.6	80.3	154.2	117.6	202.3	9.8	12.1	11.2	10	10.6	142	218	237	225	444	116	116	93	93	106	3.2	3	2.5	3
688	1	57	15	0	18	1	1	0	0	0	0	0	0	1	1	1	0	0	0	0	0	0	0	0	0	NA	252	368.1	343.4	149.6	15	14.2	13.8	11.1	11.5	177	165	168	134	205	98	68	64	104	127	2.7	2.3	2.9	2.4
689	2	82	7	0	17	3	0	0	1	0	0	0	0	3	3	3	0	0	0	0	1	0	0	0	NA	NA	188.2	232.5	189.6	18.5	12.1	9.4	8	8	9.2	191	144	125	123	265	126	93	84	82	198	3	2.2	3.2	3.2
690	1	81	11	0	12	3	0	1	1	0	0	1	0	2	3	3	0	0	0	0	0	0	0	0	0	1.1	3.4	75.5	49.9	24	12.4	11	9.8	10.6	10.8	165	146	143	167	231	154	130	103	128	124	4.1	3.4	3.1	3
691	1	59	16	0	NA	2	0	0	0	0	0	0	1	1	4	5	0	0	0	0	0	0	0	0	NA	195.7	253.7	198.5	128.9	51.8	12.8	14.2	12.4	12	11.8	448	572	481	554	790	130	86	76	141	174	2.8	1.6	2.2	2.6
692	1	82	12	0	25	3	0	0	0	0	0	0	1	1	2	1	0	0	0	0	0	0	0	0	0	77.6	81	NA	NA	NA	10.4	10.2	10.9	10.3	9.4	177	129	117	101	150	102	62	60	77	73	2.8	1.9	2.6	2.8
693	1	34	12	0	NA	3	0	0	0	0	0	0	1	1	1	1	0	0	0	0	0	0	0	0	NA	3.2	NA	156.1	112.8	40.9	16.5	15.6	12.9	15.1	14.8	250	243	214	233	354	169	155	119	172	198	3.7	3.4	2.6	3.1
694	1	74	9	0	NA	2	0	0	1	0	0	0	0	1	3	1	0	0	0	0	0	0	1	NA	NA	NA	NA	NA	113.1	NA	15.2	15.3	15	15.5	15	181	145	NA	166	NA	162	150	108	129	108	4	3	NA	3.4
695	2	66	16	0	NA	2	0	0	0	0	0	0	1	2	3	3	0	0	0	0	0	0	0	0	0	NA	NA	NA	54.5	36.1	12.6	13.5	11.8	10	10.8	276	292	243	206	243	140	134	84	120	139	3.4	2.7	3.4	2.6
696	1	59	13	0	NA	3	0	0	0	0	0	1	1	1	4	5	0	0	0	0	0	0	0	NA	1	258.6	233.3	199	103	30.3	10.7	9.8	9.1	10.4	11	376	328	288	283	350	109	100	100	92	113	2.7	2.5	2.6	3
697	1	42	8	0	11	3	0	0	0	0	0	0	0	1	3	5	0	0	0	0	0	0	0	0	0	NA	197.7	257.7	229.7	78.7	12.7	11.9	10.4	11.3	12	218	249	222	259	323	102	75	66	117	104	3.4	2.5	2.8	3.3
698	2	91	12	0	18	3	0	0	1	1	0	0	0	1	2	1	0	0	0	0	0	0	0	0	NA	NA	28.1	109.3	283.8	109.1	13.6	12	11.6	9.6	10.4	226	167	181	123	339	132	81	68	88	134	2.9	2	2.8	2.9
699	1	85	55	0	18	2	0	0	0	0	0	0	0	1	3	3	0	1	0	0	1	0	0	0	0	NA	NA	NA	NA	234.3	9.1	9.9	9.2	9.8	8.5	246	279	247	269	240	114	108	81	79	74	2.3	2	2.6	2.6
700	2	46	6	0	12	2	1	0	0	0	0	0	1	2	3	3	0	0	0	0	0	0	0	NA	NA	NA	6.2	36	NA	4.1	13.7	11.3	9.5	9.3	9.4	93	79	65	94	119	217	234	108	147	160	4.3	2.2	3.1	3.3
701	2	46	7	0	NA	1	0	0	0	0	0	0	0	1	4	4	0	0	0	0	0	0	0	0	NA	134	134.2	208.7	89.3	46.9	15.3	11.9	11.2	11.3	12.7	269	213	218	205	322	254	246	132	155	175	4.8	2.6	3.1	3.4
702	2	81	7	0	10	3	0	0	1	0	0	0	0	2	3	3	0	0	0	0	0	0	0	NA	1	60.1	174.2	NA	43.8	16.8	11.4	11.7	9.4	9.2	10	337	331	290	304	489	98	89	69	90	119	2.9	2.5	2.7	2.7
703	2	72	8	0	NA	3	0	0	1	0	0	1	1	1	4	6	0	0	0	0	0	0	0	0	NA	NA	126.9	144.5	53.2	29.4	14.8	13	9.4	9.9	11.4	176	162	133	176	308	198	163	113	117	140	3.6	2.4	2.9	3.1
704	2	83	5	0	NA	2	0	0	0	0	0	0	1	2	3	3	0	0	0	0	0	0	0	NA	NA	NA	2	30	72.3	NA	13.2	10.1	9.7	8.5	9	149	127	127	170	NA	178	164	110	143	149	4.1	2.9	2.8	3
705	1	67	9	0	NA	4	0	0	1	1	0	0	0	2	4	4	0	0	0	0	0	0	0	NA	NA	NA	6.1	19.5	74	35.2	7.6	12.7	9.9	11.7	12.9	224	87	90	140	238	144	72	61	61	95	4	2.1	2.6	3.5
706	1	53	32	0	NA	3	0	0	1	0	0	0	1	1	4	5	0	1	0	0	0	0	0	0	1	56.7	62	145.4	288.5	68.3	10.6	12	11.8	10.8	10.2	252	315	422	450	669	155	184	148	137	212	3	2.4	2.8	2.9
707	1	85	7	0	14	3	0	0	1	0	0	0	1	2	1	2	0	0	0	0	0	0	0	NA	NA	NA	NA	NA	NA	NA	12.5	11.6	9.8	9	10.5	179	161	135	137	267	125	123	77	102	119	2.6	2.8	2.7	2.8
708	1	56	13	1	27	3	0	1	1	0	0	0	1	1	3	1	1	1	0	1	0	1	0	NA	NA	NA	NA	65.4	42	159.9	10.2	8.7	8.3	10.3	7.8	236	235	220	250	128	106	83	79	107	85	3	2.3	2.8	3.1
709	1	39	6	0	11	3	0	1	0	0	0	0	0	1	4	1	0	0	0	0	0	0	0	0	NA	NA	4.3	43.8	117.6	NA	14.8	13.9	12.5	11.3	13.4	199	181	158	148	249	194	156	131	135	191	4.5	3.6	3	3.1
710	1	80	5	0	NA	2	0	0	1	0	0	0	0	1	4	4	0	0	0	0	0	1	0	NA	NA	NA	NA	NA	NA	NA	12.1	11	10.5	10.6	11	258	NA	NA	240	NA	260	245	220	195	190	3.6	NA	NA	2.6
711	2	67	13	0	NA	3	0	0	1	1	0	0	1	1	4	5	0	0	0	0	0	0	0	NA	NA	NA	281.1	215.4	233.9	NA	8.9	10.6	9	8	10.1	156	160	164	200	317	115	71	65	108	141	2.7	2.1	2.7	2.8
712	2	55	14	0	NA	2	0	0	0	0	0	0	1	2	4	4	0	0	0	0	0	0	0	NA	NA	NA	1.2	93.9	137.3	48.7	12	14.7	15.4	11.4	11.2	246	157	197	142	306	127	64	71	119	179	3.8	1.8	2.7	2.5
713	2	80	12	0	NA	2	0	0	1	0	0	0	1	4	4	4	0	0	0	0	0	0	0	0	NA	143.5	229.7	NA	NA	NA	10.1	11.5	10.4	9.2	10	311	362	338	463	NA	192	147	138	156	162	3.6	2.4	NA	2.8
714	2	61	25	1	15	4	1	1	1	0	0	0	1	1	3	3	0	0	1	0	1	1	1	0	1	189.1	176.6	209.7	259.8	115.8	9.6	9.9	10.8	9.9	9.2	126	98	87	84	93	105	81	67	97	81	2.7	2.1	2.6	3
715	1	55	15	0	NA	2	0	0	0	0	0	0	1	1	4	5	0	0	0	0	0	0	0	NA	1	151	NA	87.2	66.6	8.3	10.7	11.5	10.9	11.6	11.8	204	271	325	439	519	142	165	160	159	131	2.7	3.3	3.1	3.2
716	2	46	10	0	NA	1	0	0	0	0	0	0	1	2	4	6	0	0	0	0	0	0	0	NA	NA	NA	6.7	161.8	77.7	7.2	8.9	8	6.1	9.1	9.5	608	495	349	340	397	186	116	74	103	91	4.1	2.7	2.7	3
717	1	65	20	1	19	3	0	1	0	0	0	0	0	3	3	3	1	0	0	1	1	0	1	0	1	NA	174.9	NA	NA	NA	12	11.3	10.3	10.3	10.4	398	329	306	234	265	95	84	48	44	62	2.8	2.1	2.8	2.6
718	1	30	4	0	NA	2	0	0	0	0	0	0	0	1	2	1	0	0	0	0	0	0	0	0	NA	NA	16.4	142.1	76.3	NA	12.5	11.2	10.8	10.6	10	308	281	237	234	NA	171	138	120	115	136	4.4	3.6	NA	NA
719	1	49	9	0	NA	3	0	0	0	0	0	1	1	2	3	1	0	0	0	0	0	0	1	NA	NA	10.9	33.3	41.4	NA	NA	14.9	14.6	14.1	12.7	12.4	108	95	88	85	120	175	155	137	103	121	4.3	3.9	3.4	3
720	1	58	11	0	15	3	0	1	1	0	0	0	1	1	4	4	0	0	0	0	1	0	0	0	1	7	114.1	182.6	331.8	143.2	17.5	17.1	14.5	12.8	14	153	131	119	98	242	155	79	54	79	100	4.3	2.4	3.2	3.1
721	2	61	8	0	NA	2	0	0	0	0	0	0	1	2	4	5	0	0	0	0	1	0	0	NA	NA	19.9	17.4	46.3	NA	28.3	9.4	9.8	10.6	10	10.1	508	499	535	NA	431	105	100	104	115	126	2.9	2.6	2.7	NA
722	1	40	8	0	NA	1	0	0	0	0	0	0	0	1	4	4	0	0	0	0	0	0	1	NA	NA	231.7	174.2	147.4	189.1	68.2	13.4	11.7	10.8	10.1	10.9	307	310	324	290	374	187	167	154	142	137	3.8	3	2.9	2.8
723	2	23	80	0	NA	2	0	0	0	0	0	0	0	1	3	5	0	0	0	0	0	0	0	NA	NA	162.9	59.6	87.5	223.5	68.2	8.9	7.6	9.1	7.4	10.3	319	353	339	241	491	41	32	31	35	50	2.8	1.8	2	3
724	2	53	5	0	NA	2	0	0	0	0	0	0	1	2	3	3	0	0	0	0	0	0	0	NA	NA	NA	0.6	NA	NA	NA	13.1	11.3	12	11	10	287	205	NA	NA	NA	184	167	155	145	165	4.2	3.6	NA	NA
725	2	83	11	0	22	3	0	0	1	0	0	0	0	1	4	4	0	0	0	0	1	0	1	NA	1	140.2	NA	93.1	NA	NA	9.2	9.3	10	9.4	7.3	246	219	219	258	507	112	70	56	82	92	2.4	1.8	2.9	2.2
726	2	69	11	0	30	3	0	0	0	0	0	0	0	2	3	3	0	0	0	0	0	1	0	0	0	3.6	95.9	NA	NA	NA	13	18	10.6	8.4	9.7	218	274	156	136	478	163	178	71	69	72	4	3.8	2.6	3.5
727	1	75	6	0	NA	2	0	0	0	0	0	0	1	2	3	3	0	0	0	0	0	1	0	NA	0	5.4	30.9	NA	NA	NA	15.6	9	8.6	9	9.9	278	163	140	NA	NA	183	100	78	80	90	3.7	2.6	3	NA
728	1	91	15	0	15	2	0	1	1	0	0	0	1	1	4	6	0	0	0	0	1	1	1	0	NA	296.38	309.3	439.8	NA	NA	13.6	11.7	9.2	7.6	8.1	168	153	154	87	231	118	79	69	70	70	3.6	2.4	3.2	3.2
729	1	57	6	0	NA	3	0	0	1	0	0	1	0	1	4	1	0	0	0	0	0	0	0	0	1	5.7	NA	184.9	116.6	30.7	16.1	13.9	13.9	12.7	13	201	178	165	157	216	231	147	134	159	166	4.5	3.3	3.2	3.2
730	1	63	8	0	NA	3	0	0	1	1	0	0	1	2	3	1	0	0	0	0	0	0	0	NA	NA	13.5	27.8	229	193.4	NA	12.2	13.3	12.4	9.9	11.1	356	346	329	297	382	226	197	145	137	163	4	3.3	2.7	2.5
731	1	64	6	0	NA	3	0	0	0	0	0	0	1	2	3	1	0	0	0	0	0	0	1	NA	NA	8.8	7	19.4	75.9	NA	13.8	13.7	12.6	10.1	10	174	166	156	119	NA	151	147	121	96	110	4.1	3.8	3.2	2.9
732	1	76	40	0	NA	4	0	0	0	0	0	0	1	2	3	6	0	0	0	0	1	1	1	NA	NA	12.5	NA	147.8	245.8	169.7	9.7	12.2	11.3	8.3	11.6	379	393	405	281	314	111	88	79	69	96	2.7	2.2	2.1	2.6
733	1	78	23	0	NA	2	0	0	0	0	0	0	1	1	4	4	0	0	0	0	1	1	0	NA	NA	24	NA	54.1	108.3	19.9	9.5	7.3	6.9	9.8	10.9	219	150	153	91	190	149	88	82	89	140	2.8	1.7	1.8	3
734	2	86	46	0	32	4	0	1	1	1	0	0	0	1	3	1	0	0	0	0	1	1	1	NA	1	90.6	NA	NA	103.9	38.7	14.7	11.1	11.9	9.1	8	182	67	48	71	55	50	20	27	56	57	2.4	1.5	3	2.9
735	1	72	21	0	21	3	0	1	1	0	0	0	0	2	3	3	0	0	0	0	1	1	1	0	NA	NA	34	NA	41.5	20.6	7.9	8.1	7.4	9.3	8.4	122	136	133	134	131	71	50	38	47	47	2.9	2.5	3.1	3.4
736	1	42	10	0	7	1	0	0	0	0	0	0	0	1	3	3	0	0	0	0	0	0	1	0	NA	453.1	291.9	265.6	174.2	NA	14.5	13	10.9	11.1	11	303	262	223	301	495	139	90	106	128	183	3.7	2.8	2.9	2.8
737	2	47	81	0	14	4	0	0	0	0	0	0	0	3	3	5	0	0	0	0	0	0	1	0	0	136.4	82.4	133.3	39	16	8.3	10.8	9.2	9.2	9.6	219	276	289	262	295	54	40	49	49	52	2.2	2.7	2.4	2.8
738	2	63	10	0	10	1	0	0	0	0	0	0	1	1	4	4	0	0	0	0	0	0	0	NA	NA	NA	NA	NA	NA	NA	12.6	10.4	9.9	10.8	10.2	186	130	119	182	208	219	146	137	155	152	4	2.7	3.1	3.1
739	1	60	35	0	NA	3	0	1	1	1	1	0	0	1	3	3	0	1	1	0	1	1	1	0	0	NA	NA	194.8	182.7	211.6	8.7	7.7	8.7	6.9	8.3	245	152	164	161	289	123	55	45	60	71	2	1.4	1.9	2.3
740	1	69	19	0	20	2	1	1	1	0	0	0	0	1	4	4	0	0	0	0	1	0	0	0	NA	NA	263.5	162.2	85.1	48.6	8.8	11.1	9.1	8	7.2	330	262	232	151	249	92	69	59	82	79	2.2	1.7	2.3	2.6
741	1	50	6	0	NA	1	0	0	0	0	0	0	0	1	3	3	0	0	0	0	0	0	0	NA	NA	NA	151	NA	61.8	20.6	11.9	13.5	12.9	11.2	12.1	141	139	157	154	272	106	86	82	98	113	3.1	2.4	2.3	3
742	2	58	6	0	NA	1	0	0	0	0	0	0	1	2	3	3	0	0	0	0	0	0	0	0	0	0.4	0.7	8.3	12.7	NA	12.3	9.6	8.8	7.1	11	325	240	265	192	NA	216	140	134	143	145	3.7	2.6	2.9	3.2
743	1	80	16	0	13	4	0	0	1	0	0	0	0	1	3	3	0	0	0	0	1	1	1	NA	NA	14.9	16.4	25	167	85.1	15.9	15.9	13.2	11.8	11.9	189	176	136	112	163	210	207	123	111	117	4.2	4.2	3.2	2.8
744	1	71	16	1	34	3	1	1	1	0	0	0	1	1	4	6	0	1	1	0	1	1	1	1	1	NA	127.4	260.7	364.6	240.9	19.1	14.2	12.7	12.3	9.7	302	188	89	12	70	103	42	31	56	79	3.4	1.6	2.8	2.8
745	1	47	5	0	NA	1	0	0	0	0	0	0	0	2	3	1	0	0	0	0	0	0	0	NA	NA	59	76.6	140.5	150.1	NA	18.6	16	13.8	12.3	12	315	209	178	189	NA	190	154	128	135	139	4.9	3.7	3.3	3.3
746	2	24	15	0	22	2	0	1	0	0	0	0	1	1	4	5	0	0	0	0	0	0	0	NA	NA	108.4	159.8	216.6	137.8	58.7	9.4	9.1	8.4	9.9	10.6	167	178	189	241	527	71	45	46	89	126	3.1	2.4	2.9	2.9
747	1	53	42	0	7	3	1	1	0	1	0	0	1	1	4	6	0	1	0	1	0	1	1	0	1	49.6	141.3	256.5	191.1	220.5	9	9.7	9.4	9.6	10.7	469	241	188	78	39	125	67	85	129	97	2.7	1.9	3	3.2
748	1	71	35	0	29	4	0	1	1	1	0	0	1	1	4	6	0	0	0	0	1	1	1	NA	1	10.7	18.6	NA	140.2	40.1	9.9	10.1	10.7	8.3	8.1	378	313	308	132	115	140	74	80	79	80	2.7	1.7	1.8	2.1
749	1	78	16	0	11	3	0	0	0	0	0	0	1	2	3	3	0	0	0	0	0	0	1	0	NA	108.1	192.7	NA	NA	85.1	6.8	8.7	7.7	8.4	8.5	237	180	141	167	418	124	93	80	83	98	3.2	2.4	2.6	3
750	1	59	7	0	NA	2	0	0	1	0	0	0	0	1	4	4	0	0	0	0	0	0	1	0	NA	81.1	90.7	120.5	143.8	26.7	13.3	12.7	10.8	10.6	11.7	450	423	376	358	419	167	108	76	88	84	3.7	2.6	2.9	2.9
751	1	77	34	0	NA	2	0	0	1	0	0	0	1	1	2	2	1	0	0	0	0	0	1	0	1	353.5	179.8	232	174.9	52.7	11.7	12.2	13.7	10.4	11.5	181	213	273	313	421	139	101	102	116	115	2.7	1.8	1.9	2.2
752	1	69	28	1	43	3	1	1	0	0	0	0	1	1	3	3	0	1	1	0	1	1	1	0	1	17.8	NA	80.4	179	112.9	8.6	9.3	9.1	8.3	8.2	256	156	51	27	35	108	50	46	41	39	3.7	1.8	2.8	2.7
753	2	81	8	0	NA	2	0	0	0	0	0	0	0	1	4	4	0	0	0	0	0	0	1	NA	NA	NA	NA	NA	199.3	17.5	12.7	11	11	11	10.9	188	NA	221	256	373	246	198	189	152	152	3.8	NA	2.7	2.5
754	2	71	11	0	NA	3	0	0	1	1	0	0	1	1	4	4	0	0	0	0	0	0	1	NA	NA	NA	NA	227.3	168.7	NA	10.9	11.5	10.2	11.1	10.4	166	185	193	262	377	124	137	116	132	164	3.1	2.6	2.8	2.5
755	1	73	25	0	15	3	0	0	0	1	0	0	0	1	2	1	0	0	0	0	1	1	1	0	1	280.6	NA	277.6	90.7	153.7	15.5	13.4	12.7	12.2	12.4	197	180	170	205	296	130	63	90	103	104	3.8	2.2	2.9	2.8
756	2	67	21	1	27	3	0	1	0	0	1	0	0	1	4	5	0	1	0	1	1	1	1	0	1	NA	102.1	253.8	207.2	173.5	10.6	10.3	9.2	6.9	8.9	142	92	27	8	15	152	84	69	97	93	4.2	3.3	2.6	3.2
757	1	63	10	0	23	2	1	1	0	0	0	0	0	1	2	1	0	0	0	0	1	1	0	0	0	188.3	157.2	207.9	287.7	75.8	13	10.7	10.1	9.8	11	387	321	275	194	230	137	78	52	69	110	2.7	1.9	2.7	2.9
758	1	86	8	0	NA	2	0	0	0	0	0	0	1	2	3	3	0	0	0	0	1	0	1	NA	NA	2.3	54.9	119.6	141.9	39.7	13.6	11.9	11.3	10.2	10.4	180	174	131	142	189	205	139	123	134	140	4.3	3.3	3	3.1
759	2	37	29	0	NA	3	0	0	0	0	0	0	1	2	4	5	0	0	0	0	0	0	0	NA	NA	NA	NA	222.4	NA	NA	10	12	10.2	8.6	9.3	146	223	221	212	255	140	103	83	91	110	3.1	2.4	2.8	2.7
760	1	42	54	0	9	3	0	0	0	0	0	0	0	1	3	5	0	0	1	0	0	0	1	0	NA	69.6	NA	88.5	76.6	19.3	8.1	7.5	10.6	9.4	9.9	176	194	102	83	102	67	49	37	63	108	2.2	2.2	2.5	3.1
761	1	45	25	0	20	1	0	0	0	0	0	0	1	1	3	4	0	0	0	0	0	0	0	NA	NA	NA	339.1	NA	NA	13.7	9.1	8.8	7	9	10.2	586	501	487	435	619	125	96	85	121	170	3.3	2.4	2.6	2.7
762	1	68	13	0	NA	2	0	0	1	0	0	0	0	1	4	5	0	0	1	0	0	0	0	NA	NA	107.2	NA	161.3	NA	84.6	15.1	13.7	11.8	11.3	12.9	293	252	249	277	466	185	163	140	163	166	3.7	3.1	2.7	2.8
763	1	70	19	0	NA	1	0	0	0	0	0	0	1	1	1	1	0	0	0	0	0	1	0	0	1	263.7	225.9	255.5	127.5	99.8	11.1	9.2	7.4	7.7	8.5	454	350	262	195	167	109	84	69	75	90	3.2	2.5	2.6	2.5
764	2	57	36	0	16	4	1	1	0	0	0	0	1	1	4	5	0	0	0	0	0	1	1	0	1	431.7	NA	NA	92.7	94.8	11.4	11.1	9	10	9.5	350	230	127	91	346	110	66	78	80	85	3	2	2.4	2.5
765	2	51	9	0	NA	4	0	0	0	0	0	0	1	2	3	1	0	0	0	0	0	0	1	NA	0	1.2	6.7	57.3	22.9	5	14	12.8	11.2	10.1	10.6	144	90	85	79	144	147	104	82	112	128	4.3	2.8	3	3.1
766	1	72	10	0	NA	2	0	1	0	0	0	0	1	2	4	6	0	0	0	0	0	0	0	0	NA	16.5	62.1	NA	46.8	14.7	11.6	10.8	8.1	8.7	9	741	457	369	365	290	231	165	132	139	123	3.8	2.7	2.8	3
767	1	45	6	0	NA	2	0	0	0	0	0	0	0	1	1	1	0	0	0	0	0	0	0	1	NA	0.6	47	128.9	37.1	NA	16.6	14.8	14.9	14.2	14	320	239	246	237	NA	155	122	118	142	143	4.4	3.7	3.6	3.3
768	1	60	9	0	13	3	0	0	0	0	0	0	1	2	2	2	0	0	0	0	1	0	1	NA	NA	0.6	37.9	97.2	93.6	22.3	12.8	9.6	8.3	8.1	9.1	327	293	272	178	368	158	95	71	75	88	4.2	2.5	3	2.6
769	2	30	8	0	NA	2	0	0	0	0	0	0	0	2	3	3	0	0	1	0	0	0	0	NA	NA	0.6	0.9	85.4	33.2	NA	12.3	11.4	11.4	9.4	10	273	251	191	196	NA	179	133	143	146	144	4.6	3.7	3.2	NA
770	1	56	4	0	NA	2	0	0	1	0	0	0	1	1	4	1	0	0	0	0	0	0	0	NA	NA	NA	5.6	113.2	NA	NA	13.9	13.9	13.9	12	11	213	210	208	NA	NA	210	192	168	170	169	4.2	3.9	3.8	NA
771	1	84	6	0	13	3	0	0	1	0	0	0	0	1	1	1	0	0	0	0	0	1	0	1	0	1.3	16.6	66.2	110.1	48.1	11.8	11.1	10.1	11	11.8	176	146	135	163	168	133	101	76	101	113	3.8	2.9	2.9	3.1
772	2	65	7	0	NA	2	0	0	0	0	0	0	0	1	2	1	0	0	0	0	0	0	0	NA	NA	1	NA	NA	NA	NA	13.5	11.6	10.8	11.1	11	248	192	179	204	NA	214	143	125	130	142	4.2	3.3	2.8	3.3
773	1	21	8	0	NA	1	0	0	0	0	0	0	0	1	3	3	0	0	0	0	0	0	0	0	1	185	261.8	357.4	265	58.8	13.5	12.5	11.7	12.7	12	329	311	292	355	472	104	70	103	111	121	3.9	3.1	3.1	NA
774	1	86	15	0	22	3	1	1	1	0	0	0	0	1	4	5	0	0	0	0	1	0	1	0	1	NA	103.4	94.7	89.4	53.7	9.6	11	8.3	8.1	7.6	173	239	226	216	262	94	89	60	71	70	2.6	2	3.1	2.8
775	1	59	8	0	NA	2	0	0	0	0	0	0	0	2	3	3	0	0	0	0	0	0	1	0	0	180.5	NA	217.3	158	29.7	15.9	14	12.6	11.7	13.2	212	161	153	172	431	173	118	110	118	170	4	2.8	2.9	2.9
776	1	61	14	0	11	3	0	0	0	1	0	0	0	1	1	1	0	0	0	0	1	0	0	0	0	NA	85.7	174.1	45.2	60.1	13.9	10.6	9.6	11	10.7	100	71	55	85	109	112	63	69	90	77	2.8	1.8	2.6	3
777	2	84	9	0	NA	3	0	0	1	1	0	0	1	2	4	6	0	0	0	0	0	0	0	NA	NA	NA	NA	60.1	NA	NA	11.4	12.7	11.5	10.8	10.3	179	247	219	304	264	140	109	96	110	115	NA	3	2.7	NA
778	1	68	23	0	NA	3	0	0	0	1	0	0	1	1	2	1	0	0	0	0	1	0	1	NA	NA	NA	51.7	NA	75.1	65.2	9.8	9.3	9.9	9.3	9.4	119	157	189	241	290	116	103	99	97	127	3.3	2.7	3.2	3
779	2	51	9	0	NA	3	0	0	1	0	0	0	1	2	3	1	0	0	0	0	0	0	1	NA	NA	7.7	10.2	NA	145.1	83.9	14.3	14	13.1	11.7	11.9	136	162	132	165	187	212	163	139	164	182	4	2.7	3.2	3
780	1	54	6	0	NA	2	0	0	0	0	0	0	0	1	1	1	0	0	0	0	0	0	0	NA	NA	0.5	NA	85.5	15.2	NA	17.6	16	14.9	14.6	14	221	206	163	185	NA	206	158	124	136	146	4.6	3.7	NA	NA
781	2	73	12	0	15	2	0	0	0	0	0	0	0	1	4	6	0	0	1	0	0	0	1	1	1	0.6	NA	72.8	341.6	33.9	10.8	8.8	8.9	9	8.3	222	194	220	201	315	164	114	103	99	126	4.2	2.9	3	3.3
782	2	72	12	0	NA	2	0	0	0	0	0	0	1	1	3	3	0	0	1	0	1	0	0	NA	NA	90.6	45.3	88	181.9	57.3	10.4	8.9	7.8	8.7	9.4	689	570	495	585	503	151	92	57	79	98	2.7	1.9	3.3	3
783	2	26	7	0	NA	2	0	0	0	0	0	0	0	1	3	3	0	0	0	0	0	0	0	0	NA	85.3	179.5	202	NA	NA	10.6	10.5	9.6	9.3	9.8	312	176	216	187	335	111	79	83	87	96	NA	2.9	2.8	2.7
784	1	53	9	0	NA	2	0	1	0	0	0	0	0	1	2	1	0	0	0	0	0	0	0	1	0	1.9	22	84.6	170.8	122	13.4	13.3	12.4	10.7	10.2	197	156	160	131	153	149	123	88	78	98	3.9	3.5	3	2.6
785	2	40	15	0	19	2	0	1	0	0	0	0	1	1	1	1	0	0	0	0	1	0	1	NA	NA	20.9	NA	NA	NA	NA	10.8	8.2	6.8	9.2	9.4	627	428	339	267	390	121	37	40	70	83	3.8	2.6	3.2	3.5
786	1	58	9	0	12	3	0	0	0	0	0	0	1	2	3	3	0	0	0	0	0	1	1	0	NA	43	NA	NA	NA	27.3	13.6	12.3	10.8	10.7	9.5	138	128	119	122	159	192	132	113	152	134	4.4	3.3	3.3	3.8
787	1	60	11	0	NA	2	0	0	0	0	0	0	1	2	3	3	0	0	1	0	0	0	1	NA	NA	57.6	43.3	NA	29.6	15.6	10.9	10.6	9.8	9.7	9.4	202	164	174	204	201	154	137	121	119	127	3.1	3	2.9	NA
788	1	50	38	1	NA	3	1	1	0	0	0	0	1	2	4	4	0	0	1	0	1	1	1	0	0	18.4	74.3	NA	78.1	42.3	9.5	9	8.1	11.4	9.9	57	79	102	68	48	68	57	44	40	30	2.3	1.8	2.2	3.1
789	1	67	129	0	31	4	1	1	1	1	1	0	0	3	4	5	1	0	0	0	1	1	1	NA	1	NA	219.7	NA	NA	56.1	9.5	10.2	8.5	8.5	9.2	116	258	234	150	147	112	63	69	98	110	2.3	2.1	2.1	1.9
790	2	60	41	0	NA	2	0	0	1	0	0	0	0	1	4	1	1	0	0	0	1	0	1	NA	NA	214.8	NA	123.8	67.9	61.4	11.1	11.5	9.9	10	10.3	96	100	105	146	405	143	104	88	80	105	3.1	2.1	2.6	2.7
791	1	75	11	0	NA	3	0	0	0	0	0	1	1	2	3	3	0	0	0	0	1	0	1	NA	NA	12.2	NA	15.9	129.5	23.1	11.6	12.6	10	9.2	10.2	342	324	230	188	201	98	71	47	58	107	2.9	2.3	3.4	3.1
792	1	60	20	0	14	3	0	0	1	0	0	0	1	2	3	3	0	0	0	0	0	0	0	NA	NA	190.6	239.4	168.4	162.3	28.6	9.6	8.5	8.2	8.2	10.4	371	301	309	372	513	139	95	95	110	143	3.1	2.2	2.5	2.9
793	1	22	8	0	NA	1	0	0	0	0	0	0	0	1	1	1	0	0	0	0	0	0	0	NA	NA	16.8	138.8	226.9	69	24	14.5	14.2	14.5	12.6	13.4	172	151	191	200	328	116	55	63	80	77	NA	2.7	2.9	2.7
794	1	69	9	0	27	3	0	0	0	0	0	0	0	1	4	5	0	0	0	0	0	0	1	NA	0	2.7	112.2	241	52.8	16.6	15.9	13.1	12.7	10	11.2	310	222	215	214	445	123	68	59	76	111	4.3	2.7	3.2	2.9
795	1	50	28	0	NA	1	0	0	0	0	0	0	1	2	3	3	0	0	1	0	0	0	1	NA	NA	40.9	85	110.4	132.9	136	14.1	13.5	12.1	11.4	10.6	162	146	168	214	305	132	61	51	81	116	4	1.9	3.1	2.7
796	1	54	10	0	NA	1	0	0	0	0	0	0	1	1	4	5	0	0	0	0	0	0	0	0	NA	NA	154.7	NA	NA	NA	12.9	13	10.7	10.1	10.8	276	294	275	347	416	115	73	64	103	117	3.5	2.6	2.6	3.1
797	2	51	12	0	NA	2	0	0	0	0	0	0	1	1	4	4	0	0	0	0	0	0	0	NA	NA	NA	NA	NA	NA	NA	10.4	8.6	8.2	8.1	9.2	394	348	309	223	354	263	190	176	144	127	3.2	2.3	2.2	2.1
798	2	84	5	0	NA	3	0	0	1	0	0	0	1	2	3	3	0	0	0	0	0	0	0	NA	NA	0.3	0.5	27.1	140.9	41.6	10.3	10	8.3	8	8.5	224	186	157	166	215	157	140	117	111	115	3.7	3.2	2.9	2.6
799	1	80	75	0	29	3	0	0	1	1	1	0	0	3	3	5	0	0	0	0	1	1	1	1	NA	115.8	NA	NA	66.3	NA	8.9	12.2	10.1	10.9	10.9	210	212	193	227	211	96	53	40	59	52	2	1.8	3	2.5
800	1	69	16	0	NA	2	0	0	1	0	0	0	1	1	4	5	0	0	0	0	0	0	0	0	NA	NA	28.4	NA	15	11.5	9.8	8.7	8.2	8.9	8.8	357	301	292	356	311	132	88	89	96	120	NA	2.8	NA	NA
801	1	69	6	0	NA	1	0	0	0	0	0	0	1	1	4	4	0	0	0	0	0	0	0	0	NA	NA	37.3	176.3	76.8	NA	11.8	12.6	11	10.3	11.2	265	281	240	202	253	171	168	127	141	148	3.8	4.2	3.5	3.5
802	1	45	61	0	NA	3	0	0	0	1	0	0	0	2	3	3	1	0	0	0	0	0	0	NA	NA	77.1	NA	164.4	179.6	168.4	8.7	9.4	9.1	7.5	11.9	475	449	482	393	379	228	178	163	119	92	2.7	NA	2.5	2.6
803	1	57	33	0	NA	1	0	0	0	0	0	0	0	2	3	3	0	0	1	0	0	0	1	NA	NA	32.8	25.2	79.8	140.1	97.4	11.2	9.8	10.6	8.9	8.8	137	111	135	126	150	162	119	102	85	62	3	2.3	3.1	2.6
804	1	51	25	0	NA	2	0	0	0	0	0	0	1	1	4	5	0	0	1	0	0	0	0	0	NA	218.3	NA	254.2	151.5	53.3	11.9	11.2	11.5	8.9	9.7	172	170	187	186	295	122	69	61	89	125	3.3	2.1	2.2	2.7
805	1	46	8	0	NA	1	0	0	0	0	0	0	0	1	4	4	0	0	0	0	0	0	1	NA	NA	69.5	NA	NA	215.6	NA	15.7	15.2	14	13.8	13.4	186	171	165	201	227	204	153	139	151	204	4.4	3.8	3.3	3.4
806	2	70	68	0	16	3	0	0	1	0	0	0	1	3	4	4	0	0	0	0	0	0	0	NA	NA	374.7	252.6	287.8	140.9	52.6	10.8	9.1	8.6	9.1	8.9	136	125	118	86	147	124	78	82	102	112	2.5	2.1	2.5	2.9
807	1	60	20	0	NA	2	0	0	0	0	0	0	1	2	4	3	0	0	0	0	0	0	1	NA	NA	NA	46.7	102.1	87.5	NA	10.6	12.2	9.1	9.7	9.3	290	280	257	282	359	229	215	154	186	187	3	2.6	2.7	2.9
808	1	48	7	0	NA	2	0	0	0	0	0	0	0	1	2	1	0	0	0	0	0	0	0	NA	NA	1.9	NA	233.9	213.6	40.7	17.6	15.9	14.8	15.2	14.6	277	229	219	229	306	243	193	154	194	221	4.3	3.9	3.5	3.6
809	1	80	24	0	14	2	0	0	0	0	0	0	1	2	3	1	0	0	0	0	1	0	1	NA	NA	20.1	11.6	63.5	117.6	60.9	13	12	11.1	10.6	10.2	168	153	136	121	177	114	65	54	63	60	3.1	2.4	3	2.8
810	2	63	6	0	NA	1	0	0	0	0	0	0	1	1	4	1	0	0	0	0	0	0	0	NA	NA	NA	NA	63.1	NA	NA	12	12.9	12.5	11.1	10.2	142	162	160	204	275	172	186	181	178	195	3.1	3.2	3.1	3.2
811	1	37	28	0	NA	2	0	0	0	0	0	0	0	4	4	3	0	0	0	0	0	0	1	NA	NA	NA	38.8	156.8	106.1	37.3	12.6	12.4	11.8	10.6	11.2	273	269	267	238	321	105	107	92	102	122	3.8	3.8	3.1	3.1
812	1	50	10	0	NA	3	0	0	0	0	1	0	0	1	2	1	0	0	0	0	0	1	0	0	NA	0.5	6.3	31.2	7.8	1.1	12.1	11.2	10.1	10.7	10.7	279	208	174	187	188	223	211	180	204	193	3.9	3.9	3.1	3.5
813	1	47	16	0	22	3	1	1	0	0	0	0	1	1	2	1	0	0	1	0	1	1	1	1	1	0.7	61.1	230.3	331.8	41.3	13.4	16.4	10.7	9.1	9.3	110	80	53	43	144	161	49	54	78	88	4	2.3	3.1	2.6
814	2	76	95	0	NA	3	0	0	1	1	0	0	1	2	4	6	0	0	0	0	0	0	1	NA	NA	44.3	NA	NA	NA	NA	10.5	10	10.5	9.1	9.4	317	NA	346	272	375	168	159	154	127	142	3.5	NA	2.9	2.4
815	1	75	7	0	NA	3	0	0	0	1	0	0	1	2	3	3	0	0	0	0	0	0	1	NA	NA	4.7	37.8	145.6	50.1	15	15.2	12.2	11.7	9.4	10.1	193	132	163	125	201	159	75	64	97	117	4.3	2.5	2.6	3
816	1	86	24	0	23	4	0	1	1	0	0	0	0	1	1	1	0	0	0	0	1	1	1	0	1	320.9	NA	NA	157.9	NA	10	6.6	8.5	8.1	9.4	333	226	193	151	214	97	48	37	51	75	2.4	1.2	2.7	2.6
817	1	74	29	0	NA	3	0	0	1	1	0	0	1	3	4	6	0	0	0	0	0	1	0	NA	NA	142.2	62.1	NA	134.6	34.8	8.8	10.2	8.1	9	9.1	157	199	187	187	271	64	50	35	63	74	3	1.9	2.6	2.7
818	2	84	90	0	NA	2	0	1	0	0	0	0	1	1	4	4	0	0	0	1	1	0	1	NA	NA	73.3	59.2	NA	129.4	68.3	7.3	13.4	10.5	10	9.8	202	198	189	227	361	39	33	27	49	71	2.2	1.4	2.7	2.4
819	2	65	11	0	NA	2	0	0	0	0	0	0	0	1	1	1	0	0	0	0	0	0	0	0	0	NA	131	109.6	145.1	98	10.6	10.2	8.5	8.5	7.7	NA	204	186	227	279	189	177	148	142	120	NA	2.7	2.4	2.5
820	2	79	12	0	NA	3	0	0	1	0	0	0	0	1	3	5	0	0	1	0	0	0	0	0	1	NA	36.5	NA	NA	NA	11.6	10.5	7.1	9.1	9.4	553	361	263	214	245	141	118	57	59	84	3.7	2.4	2.4	2.6
821	1	52	31	0	39	4	0	0	0	1	0	0	0	1	3	1	0	1	0	0	0	0	0	0	1	229.7	NA	NA	NA	NA	14.3	8.5	5.3	9.3	10.2	248	141	148	124	221	81	22	44	66	108	1.7	1.4	2.3	2.6
822	1	46	15	0	NA	2	0	0	0	0	0	0	1	2	3	3	0	0	0	0	0	0	0	NA	NA	NA	36.5	NA	NA	NA	8.5	9.4	8.9	9.2	8.4	227	203	229	274	280	115	92	81	84	105	NA	3.5	3.2	3.3
823	2	76	24	0	NA	1	0	0	0	0	0	0	1	1	4	4	0	0	1	0	0	0	0	0	NA	144.1	136	165.9	32.5	28.6	9.5	10.8	7.8	13.8	14.2	176	146	133	130	147	108	73	58	83	126	2.9	2.1	3.4	2.8
824	1	68	11	0	NA	1	0	1	0	0	0	0	1	2	3	3	0	0	0	0	0	0	0	0	NA	0.7	5.4	53.1	195.9	NA	16.3	17	12.8	9.7	10.3	236	212	155	121	182	315	258	131	119	140	4.3	2.9	3.5	2.8
825	1	68	16	0	19	2	0	0	0	0	0	0	1	2	3	3	0	0	1	0	0	0	0	0	1	2.4	3.5	170.8	158.8	70.3	12.3	12.8	11.2	10.3	9.6	267	205	181	150	387	133	68	35	78	120	3.5	3	2.4	2.6
826	2	75	48	0	NA	3	0	0	1	0	0	0	1	2	4	6	0	0	0	0	0	0	1	NA	NA	NA	NA	127.8	216.5	117.4	5.3	7.7	11.4	9.6	9.9	251	199	174	134	187	50	40	47	33	70	2	2.1	2.4	2.6
827	2	62	7	0	NA	1	0	0	0	0	0	0	0	2	3	3	0	0	0	0	0	0	0	NA	NA	1.7	NA	NA	NA	NA	11.9	12.6	11.5	10.1	11	363	312	313	290	NA	169	137	127	135	145	3.9	3	3	2.8
828	2	64	52	0	NA	3	0	0	0	0	0	0	1	1	1	1	0	0	0	0	0	0	0	0	1	NA	1.3	NA	NA	NA	10.5	10.9	10.5	9.6	8.7	142	81	66	42	113	117	113	124	130	111	NA	3.1	3.2	2.9
829	1	50	25	1	13	4	1	1	1	1	1	0	0	1	4	4	0	1	0	0	0	1	0	1	1	213	NA	NA	106.6	71.5	9.7	9.3	9.2	8.8	7	263	135	146	106	95	150	59	48	60	57	2.3	1.7	2.4	2.2
830	2	43	8	0	NA	2	0	0	0	0	0	0	1	1	4	4	0	0	0	0	0	0	0	NA	NA	12.7	10	119.3	83.1	29.5	12.5	14.1	10.9	9.7	9.9	185	180	173	185	339	120	97	59	90	103	3.1	2.7	2.5	3.1
831	2	69	7	0	19	2	0	0	1	0	0	0	0	2	3	3	0	0	0	0	0	0	0	0	1	NA	239.5	240.2	NA	NA	12.6	12.2	10.4	8.2	8.6	153	151	124	105	321	113	96	75	88	76	3.1	2.5	2.1	2.7
832	2	67	18	0	NA	3	0	0	0	0	0	0	1	1	4	5	0	0	0	0	0	0	0	0	NA	48.1	130.6	134.5	92.9	35.7	9.8	11.1	10.7	9.1	9.6	368	308	362	363	566	85	71	73	87	130	2.9	2.2	2.7	2.6
833	1	67	22	0	NA	2	0	0	0	0	0	0	1	2	3	5	0	1	0	0	0	0	0	0	1	NA	NA	168	175.6	140.9	11.4	11.6	9.8	10.5	13	106	141	140	313	392	102	57	52	44	45	3	2	2.5	2.4
834	1	63	23	0	16	3	0	0	0	0	0	0	1	1	4	5	0	0	0	0	0	0	0	0	1	236.9	217.8	241.5	79.5	161.2	6.3	8.6	9.7	8.7	8.8	475	382	485	463	595	105	81	66	95	82	3	2.4	2.9	2.5
835	1	44	20	0	NA	3	0	0	1	0	0	0	1	1	4	5	0	0	0	0	0	0	0	0	NA	NA	NA	37.9	153.2	NA	8.3	9.4	10.1	9.3	10.3	366	396	438	422	404	100	107	110	145	160	2.8	3.1	3.2	3.2
836	2	79	16	0	20	3	0	0	1	1	0	0	0	2	3	3	0	0	0	0	0	0	0	0	0	NA	4.4	NA	NA	27.1	14.9	12.6	10.6	8.1	11.6	220	203	171	134	185	125	70	57	78	136	4.1	2.1	2.9	2.9
837	1	44	11	0	NA	3	0	0	0	0	0	0	1	2	3	1	0	0	1	0	0	0	0	0	0	NA	72.9	NA	275.2	78.2	13	12.5	12.9	12.7	12.8	NA	283	269	270	487	135	120	75	118	130	NA	3.6	3	3.3
838	1	18	16	0	7	2	0	0	0	0	0	0	0	1	3	3	0	0	0	0	1	0	0	0	NA	1.3	243	287.8	215	140.6	11.9	11.2	9.1	7	9.7	163	136	113	96	296	103	98	47	49	78	3.9	3.5	2.4	3
839	1	48	14	0	NA	3	0	0	1	0	0	0	1	1	1	2	0	0	0	0	0	0	0	NA	NA	3.5	3.2	70.4	106.8	34.6	13.9	14.6	14.7	12.9	14.5	176	190	191	170	253	187	173	163	137	174	3.5	3.3	3.2	2.7
840	2	43	32	0	12	3	0	0	1	0	0	0	1	1	4	6	0	0	0	0	1	0	0	0	1	64.2	75	185.4	125.5	125.5	11.6	14.1	11.1	9.4	10.4	267	215	157	123	165	77	35	38	46	59	1.6	2.3	3.1	2.5
841	2	61	23	0	NA	2	0	0	0	0	0	0	1	1	4	5	0	0	0	0	0	0	0	NA	1	140.5	144.6	195.5	243.5	189.6	9	9.4	8.4	8.3	9.4	189	227	208	277	510	167	162	144	146	150	3.2	2.8	2.4	3.1
842	1	51	11	0	NA	3	0	0	0	1	0	0	0	1	3	3	0	0	0	0	0	0	0	NA	NA	87.7	111.2	164.8	177.6	69.7	12.3	12.5	11.3	10.4	11.8	152	128	119	140	331	145	140	148	199	222	2.2	2.1	2.5	3
843	2	35	147	0	13	4	0	1	0	0	1	0	0	1	4	6	0	1	0	0	0	0	0	0	0	102.3	NA	NA	207.7	283.4	9.1	8.6	9.1	8.6	11.1	63	96	52	82	303	76	72	65	73	66	2	1.7	2.9	2.2
844	1	83	13	0	19	3	0	0	0	0	0	0	1	1	2	3	0	0	1	0	0	0	0	0	NA	NA	156	107.2	NA	NA	12	10.8	9.1	6.3	8.8	182	295	258	366	373	98	99	46	63	68	2.5	2.5	1.3	2.6
845	1	35	8	0	NA	3	0	0	0	0	0	0	0	1	3	3	0	0	0	0	0	0	0	0	0	NA	5.7	NA	66.6	27	17.2	16.4	16.1	17.3	15.3	192	139	149	209	279	159	119	100	167	161	4.4	3.6	3.3	3.5
846	1	67	21	0	14	2	0	0	1	0	0	1	1	1	4	6	0	0	1	0	0	0	0	0	1	33.6	NA	NA	NA	118.3	11.8	11	10.6	7.9	8.3	212	NA	150	156	300	68	69	47	39	42	NA	NA	1.6	2.5
847	1	60	12	0	NA	3	0	0	0	1	0	0	1	1	1	1	0	0	0	0	0	0	0	0	NA	NA	6.8	98.4	48.3	NA	11.8	11.2	11.7	11.9	12.1	175	171	146	114	106	154	140	136	158	158	NA	3.8	3.5	3.6
848	2	73	13	0	NA	3	0	0	1	1	0	0	1	1	4	1	0	0	0	0	0	0	0	0	NA	NA	0.4	21.8	143.4	14.1	11.5	11.3	11.4	9.2	9.5	NA	191	140	106	148	135	110	82	90	118	NA	4	3.4	3.1
849	2	65	13	0	15	2	0	0	1	0	0	0	1	1	4	6	0	0	0	0	0	0	0	0	0	NA	76.3	NA	259.4	149.8	11.5	12.2	12	9.2	8.8	417	465	338	312	383	110	98	42	65	58	NA	3.4	1.4	3.3
850	1	40	14	0	NA	3	0	0	1	0	1	0	0	1	4	4	0	0	0	0	0	1	0	0	NA	NA	214.3	NA	NA	8.1	11.6	10.9	10.9	10.1	10.8	230	211	203	260	495	85	81	97	136	114	3.7	3.1	3	3.5
851	1	35	11	0	NA	2	0	0	0	0	0	0	0	1	3	3	0	0	0	0	0	0	1	0	NA	NA	NA	28.3	47.4	12	11.1	11.1	11.5	12.3	10.8	352	351	375	348	307	112	120	117	124	109	3.1	3.1	3.2	3.2
852	1	74	29	0	NA	1	0	0	1	0	0	0	1	2	2	2	0	0	0	0	0	0	1	NA	NA	NA	5.3	NA	35.8	NA	12.1	13	12.1	12.2	10.2	108	132	102	109	118	154	148	100	98	113	NA	3.4	NA	NA
853	2	83	11	0	18	2	0	0	1	1	0	0	0	2	3	3	0	0	0	0	1	0	0	0	1	NA	NA	66.6	219.1	94.2	13	12.7	14	9.1	10	NA	238	283	139	264	98	54	35	52	88	NA	1.5	2.7	2.5
854	2	77	19	0	25	3	0	1	1	1	0	0	1	1	4	4	0	0	0	0	0	0	1	0	NA	82.3	238.8	219.1	224.9	88.5	13.8	11.6	10.3	8.1	8.5	325	188	203	163	322	204	62	50	106	152	3.8	1.3	2.5	2.7
855	2	31	80	0	NA	3	0	0	0	0	0	0	0	2	3	3	0	0	1	0	0	0	0	0	NA	124.3	NA	108.6	57.9	5.1	7.6	9.5	9.2	8.3	9.5	430	320	312	263	391	135	124	107	117	127	NA	2.7	2.6	2.6
856	1	59	12	0	38	3	0	0	0	1	0	0	0	1	1	2	0	0	0	0	1	0	0	0	0	NA	68.4	NA	142.9	97.4	17	19.1	15	12.4	13.8	127	144	115	105	181	127	80	53	81	89	3.9	3.3	2.9	2.6
857	1	24	24	0	NA	3	0	0	0	0	0	0	0	1	3	5	0	0	0	0	0	0	0	NA	NA	269.3	259.8	148.1	87.7	55.4	8.4	7.8	8.8	8	8.4	430	365	220	285	431	51	47	36	66	83	2.8	2.7	2.6	2.7
858	2	23	22	0	NA	2	0	0	0	0	0	0	0	1	3	5	0	0	0	0	0	0	0	NA	NA	249.2	195.4	145.6	181.1	56.3	8.7	8.6	10.4	9.9	10.7	123	149	134	139	221	62	69	41	81	66	3	2.6	2.8	2.9
859	1	69	12	0	21	3	0	0	1	1	1	0	0	2	3	3	0	0	0	0	0	0	0	NA	0	NA	57.4	NA	136.9	40.7	9.1	9.6	9	9	9.1	213	221	206	124	180	132	110	84	103	110	3.3	2.8	3.3	2.8
860	2	66	27	0	NA	4	0	0	1	0	0	0	1	2	4	4	0	1	0	1	0	0	0	0	NA	6.7	51.2	138.5	203.4	101.4	13.8	14.2	13.9	10.4	10.2	327	224	249	207	262	135	40	46	62	105	3.5	1.2	2.5	2.7
861	1	54	13	0	9	2	0	0	0	0	0	0	1	1	4	6	0	0	1	0	0	0	0	1	1	NA	194.9	240.7	NA	NA	15	14.8	13.7	12.1	11.7	NA	354	312	327	471	165	160	110	134	107	NA	3.5	3.1	2.7
862	1	28	6	0	NA	2	0	0	0	0	0	0	1	1	4	5	0	0	0	0	0	0	0	NA	NA	NA	13.4	15.8	NA	NA	13	12.5	11.4	11	11	NA	374	303	267	NA	145	142	129	119	120	NA	3.8	3.5	3.3
863	2	68	69	0	31	2	0	1	1	0	1	0	0	3	4	6	0	1	0	1	0	1	0	0	1	411.6	194.9	129.2	220	151.5	6.9	12.1	4.6	10.1	8.4	77	17	36	44	84	114	56	52	66	89	2.6	2	2.2	2.9
864	2	70	11	0	NA	2	0	0	0	0	0	0	0	2	3	3	0	0	0	0	0	0	0	0	NA	36.4	13.9	NA	NA	25	13	13.7	13.2	11.4	10.8	246	261	292	330	568	133	39	43	82	103	3.6	1.4	2.5	3
865	1	65	110	1	15	2	0	0	1	0	1	0	1	1	4	6	0	1	0	1	0	1	0	0	1	NA	43.2	NA	325.9	296.9	10.7	12.1	10	9.3	10.2	298	326	255	235	195	134	127	74	57	58	2.7	2.8	1.9	2.9
866	2	51	21	0	12	2	0	0	0	0	0	0	1	1	4	6	0	0	0	0	0	0	0	NA	NA	NA	100.3	38.7	66.9	19.8	11	11	12.7	8.7	10	NA	307	251	176	288	178	169	98	88	131	NA	2.8	4.4	3.1
867	2	75	16	0	18	3	0	1	0	0	0	0	0	3	4	4	0	1	0	0	1	0	0	0	NA	27.9	235.4	NA	173.4	20.8	11	7.3	9.8	8.6	9	33	59	106	89	32	121	59	71	79	75	NA	2.3	2.7	3.3
868	1	57	12	0	NA	3	0	0	1	1	0	0	1	1	4	5	0	0	0	0	0	0	1	NA	NA	78.3	62.9	68.8	33.4	11.4	8.5	8.9	8.9	8.2	8.8	359	383	419	498	729	118	127	122	126	157	2.6	2.6	2.5	2.9
869	2	46	8	0	NA	3	0	0	0	1	0	0	1	1	4	5	0	0	0	0	0	0	0	0	1	18.5	119.4	245.6	114.6	NA	11.8	9.9	10.2	10	11	512	416	397	333	NA	229	181	163	145	178	4	3.3	3	3.1
870	2	78	14	0	NA	2	0	0	1	0	0	0	0	1	4	4	0	0	0	0	0	0	1	0	NA	121.3	64.4	50.8	106.1	32.3	12.5	11.6	10.4	10.6	11.1	195	192	173	175	297	121	116	96	90	114	2.9	2.6	3	2.6
871	1	76	21	0	15	2	0	0	0	0	0	0	0	1	3	3	1	1	0	1	0	0	0	0	NA	NA	189.3	220.9	164.1	78.5	10.7	8.1	8.1	7.5	9.6	85	87	139	218	363	66	50	62	66	78	2.4	2.1	2.2	2.7
872	2	80	8	0	20	3	0	0	0	1	0	0	0	2	1	2	0	0	1	0	1	0	0	0	NA	NA	1.1	158.1	78.7	37.5	9	7.5	9.7	8	9.2	NA	215	116	126	431	168	134	75	78	154	NA	2.2	3.3	2.8
873	1	55	19	0	NA	2	0	0	0	0	0	0	1	1	4	5	0	1	0	0	0	0	0	NA	1	174.5	165.7	156.3	129.7	37.8	9.9	11.1	9.7	7.5	9	417	355	480	533	652	104	63	54	65	119	2.7	1.6	2.9	2.8
874	1	42	19	0	6	2	0	0	0	0	0	0	1	1	1	2	0	1	0	0	0	0	0	0	0	220.9	253	197.3	91.7	52.8	14.8	14.4	12.8	12.2	11.3	220	187	162	204	434	84	46	38	53	52	3.4	2.4	2.5	3.1
875	1	76	7	0	NA	3	0	0	0	0	0	0	1	1	4	4	0	0	0	0	0	0	0	0	NA	90.1	111.2	127.9	57	NA	14.1	13.3	12.9	12.1	12	170	148	158	180	NA	185	154	146	143	153	3.3	3.1	2.8	2.9
876	1	60	18	0	14	2	0	0	0	0	0	0	0	1	3	3	0	0	0	0	0	0	0	NA	NA	NA	NA	NA	189.5	40.9	14	14.6	13.9	12.6	12.3	NA	115	107	117	248	132	101	89	112	119	NA	2.7	3.1	3.1
877	2	57	19	0	NA	1	0	0	0	0	0	0	1	1	4	5	0	1	0	0	0	0	0	0	0	NA	76.2	91.2	128.4	69.3	12	10	10.2	9.9	8.6	NA	280	278	313	458	156	144	123	120	123	NA	3.2	2.8	2.8
878	2	56	7	0	NA	2	0	0	0	0	0	0	0	2	4	4	0	0	0	0	0	0	0	0	NA	NA	1.4	39.1	NA	12.6	13	13.8	11.1	11	11.9	NA	240	185	NA	269	228	241	150	186	212	NA	4.2	2.8	NA
879	2	71	6	0	NA	2	0	0	1	0	0	0	1	2	4	4	0	0	0	0	0	0	0	NA	NA	NA	1.5	32.1	61.9	16.1	10	9.9	9.2	8.9	9.3	NA	254	249	334	303	232	190	170	191	202	NA	3.7	3.5	3.6
880	1	71	14	0	NA	2	0	0	0	0	0	0	1	3	3	3	0	0	0	0	0	0	1	NA	NA	50.6	NA	NA	NA	NA	12.9	12.7	11.8	11.6	11	196	235	195	195	NA	161	141	128	133	140	3.5	3.5	3.2	3.1
881	2	71	10	0	20	2	0	0	1	0	0	0	0	1	3	1	0	1	0	0	0	0	0	0	1	NA	NA	127.1	103.5	41.1	12	12.8	11.1	11.6	10.8	262	267	211	178	275	118	81	66	69	88	NA	1.7	2.4	2.6
882	1	78	19	0	NA	3	0	0	0	0	0	0	0	2	3	3	0	1	1	1	0	0	0	0	1	NA	27.6	102.2	99.2	52.4	11.5	10.9	10.8	8.8	9.5	352	339	271	166	457	97	66	28	32	103	3.4	2.5	3.3	3.1
883	1	60	19	0	NA	2	0	0	0	1	0	0	1	1	4	5	0	1	0	0	0	0	0	0	1	140.6	114.8	247	238.4	122.9	12	15.3	14.9	10.5	10.9	229	322	328	319	448	158	172	63	76	92	3.1	3.3	2.2	3.1
884	1	54	4	0	NA	2	0	0	0	0	0	0	0	1	1	1	0	0	0	0	0	0	0	NA	NA	NA	52.6	198.5	NA	NA	14.6	13.2	13	13	12	299	272	243	NA	NA	141	130	110	115	125	3.6	3.4	3.1	NA
885	1	21	11	0	NA	2	0	0	0	0	0	0	0	1	4	4	0	0	0	0	0	0	0	0	1	NA	139.2	NA	144.9	NA	15	14.6	14.5	13.9	14	NA	274	248	326	NA	178	91	99	166	169	NA	3.8	3.8	3.4
886	2	79	8	0	NA	2	0	0	0	0	0	0	1	1	4	5	0	0	0	0	0	0	0	NA	NA	105.2	51.3	50.7	NA	NA	12	10.7	11	11	11	317	324	363	NA	NA	164	153	153	159	160	NA	2.9	3	NA
887	2	67	36	0	17	4	0	0	0	0	0	0	0	1	2	3	0	0	0	0	0	0	0	0	NA	70.6	160.8	265.2	184.3	122.7	13	12.7	11.2	8.6	8.4	NA	232	209	135	256	170	164	108	107	156	NA	4.1	2.6	2.5
888	1	63	98	0	14	3	0	0	1	1	0	0	0	1	3	1	0	0	0	0	1	1	0	1	1	2.3	NA	278.4	294.4	132	11.1	11	8.8	7.7	7.5	222	103	41	36	56	93	71	33	35	65	3.2	2.8	2.4	2.5
889	2	73	7	0	NA	3	0	0	1	1	0	0	1	1	4	5	0	0	0	0	1	0	0	NA	NA	NA	4.4	9.5	7.1	NA	12	11.6	10.9	11.4	10	NA	296	256	238	NA	90	64	51	36	80	NA	3	2.6	3.2
890	1	78	16	0	NA	3	0	0	1	1	0	0	1	1	4	5	0	0	0	0	0	0	0	0	NA	NA	139.2	94.3	89.9	33.7	10	9.2	7.6	11.5	10.9	NA	656	630	404	405	98	88	69	68	69	NA	2.3	2.1	2.6
891	1	34	13	0	NA	2	0	0	0	0	0	0	0	1	3	3	0	0	0	0	0	0	0	0	NA	142.4	75.2	181.4	193.7	95	12.9	11.7	9.8	8.7	7.5	597	590	491	415	389	64	48	45	43	47	NA	2.5	NA	2
892	1	70	11	0	NA	3	0	0	0	0	0	0	1	1	3	3	0	0	0	0	0	0	0	0	0	NA	47	105.8	158.7	NA	13.2	12.5	11.7	11.4	7.8	362	303	257	218	143	143	117	120	124	132	4.4	3.4	2.9	3.1
893	2	71	64	0	38	4	0	0	0	0	0	0	1	1	3	5	0	1	1	0	1	0	0	0	1	146.8	193.7	127.4	65.8	22.2	8.8	10.1	7.8	7.5	7.8	250	366	298	342	418	63	65	41	59	89	3	2.9	2.9	2.8
894	1	55	19	0	13	3	0	0	0	0	0	0	1	1	4	6	0	1	0	0	0	0	0	0	NA	NA	144.9	NA	76	44.8	13.1	12	11.6	8	8.2	95	NA	117	69	85	115	100	70	49	51	3.1	NA	1.1	2.4
895	1	63	10	0	NA	2	0	0	0	0	0	0	1	1	4	1	0	0	0	0	0	0	0	NA	NA	NA	5.9	107.5	183.5	89.8	14.6	13.8	12	12.7	12.7	212	126	NA	156	325	160	139	77	100	113	NA	4	3.1	2.5
896	1	29	20	0	NA	1	0	0	0	0	0	0	1	1	1	1	0	0	0	0	0	0	0	NA	NA	48.3	68.4	189.6	121.1	5.3	12	11.3	10.1	9.7	11.8	NA	303	280	260	417	145	134	106	119	134	NA	3.7	3.1	3
897	2	59	18	1	32	4	0	1	1	1	1	0	0	3	4	5	0	1	0	0	0	1	0	0	1	NA	271.4	178.9	68	NA	10	10.4	9.6	9.1	12	NA	10.4	26	13	79	28	42	51	45	60	NA	1.6	2.5	2.7
898	1	72	7	0	NA	2	0	0	0	0	0	0	0	1	2	1	0	0	0	0	0	0	0	0	NA	NA	56.2	NA	NA	47.9	15	15.6	14	11.4	11	NA	236	NA	154	194	180	169	140	138	163	NA	3.1	NA	2.7
899	1	33	13	0	NA	1	0	0	0	0	0	0	1	1	1	1	0	0	0	0	0	0	0	0	1	156.1	233.9	165.3	94.6	NA	12	10.9	7.7	9.2	9.4	NA	138	159	238	505	150	130	92	113	122	NA	3.1	1.9	2.4
900	1	54	7	0	NA	2	0	0	0	0	0	0	1	1	4	6	0	0	0	0	0	0	0	0	1	249.2	209.6	117	42.6	NA	9.7	9.9	10.3	10.9	10	208	299	321	514	NA	160	129	142	155	160	NA	3	3.4	NA
901	1	66	10	0	NA	3	0	0	1	0	1	0	0	2	3	3	0	0	0	0	0	0	0	0	NA	49.1	50.2	126.5	130.8	NA	15	11.9	11.9	10	9.9	230	157	180	NA	355	211	91	67	100	108	3.8	1.6	2.8	2.8
902	1	33	24	0	NA	2	0	0	0	0	0	0	0	1	4	6	0	1	0	0	1	0	1	0	1	3.9	100	195	139.4	139.3	12.1	10.8	8.9	9.5	8.4	500	332	274	294	410	145	61	57	74	64	3.7	2.1	2.8	2.8
903	2	40	20	0	NA	2	0	0	0	0	0	0	1	1	4	4	0	1	0	0	0	0	0	NA	NA	90.5	82	NA	254.8	136.2	9.7	11.9	10.9	8.3	9.2	304	228	288	295	482	132	97	83	101	135	2.8	2.4	2.3	2.6
904	2	43	12	0	7	3	0	0	0	0	0	0	1	1	4	6	0	0	1	0	0	0	0	0	1	35.5	81.9	159	NA	NA	10.6	11.8	9.5	11	10	249	347	257	NA	NA	118	80	75	98	105	3.6	3.1	2.5	NA
905	1	61	6	0	NA	3	0	0	1	0	1	0	1	2	4	6	0	0	0	0	0	0	0	NA	NA	NA	NA	1.1	NA	NA	11.8	11.9	12.1	12	12	260	316	238	246	NA	150	140	130	115	128	NA	3.4	3	NA
906	1	62	15	0	7	1	1	1	0	0	0	0	0	1	3	1	0	0	1	0	0	0	0	0	1	NA	120.3	289.3	232.3	99.4	13.8	12.7	12.5	9.4	10.2	258	169	187	103	329	210	65	74	108	128	4.1	3.2	2.6	2.8
907	2	71	12	0	NA	2	0	0	1	0	0	0	0	2	3	3	0	0	0	0	0	0	1	0	NA	NA	NA	28.4	NA	8.9	11.7	11.4	12.3	12	11.2	211	178	194	NA	311	99	85	89	90	93	NA	2.5	2.8	NA
908	1	73	102	0	35	3	0	0	1	0	0	0	1	1	4	6	0	0	0	0	1	1	0	0	1	NA	110.9	171.7	174.8	100.3	9.2	7.8	7.6	6.3	8.5	124	106	89	111	135	159	127	95	110	139	2.6	2	2.9	2.3
909	1	84	13	0	NA	2	0	0	1	1	0	0	0	1	2	1	0	0	0	0	0	1	0	NA	NA	7	73.2	178.2	NA	22.7	14.6	13.3	11.2	11	11.7	192	162	145	NA	9	167	126	86	113	162	3.8	3.5	3.3	NA
910	2	73	9	0	NA	3	0	0	1	0	0	0	0	1	4	6	0	0	1	0	0	0	0	0	1	NA	223.6	300.7	288.6	55.7	12	12.4	11.7	10.3	11	NA	246	244	309	NA	230	157	153	201	216	NA	3	2.9	2.8
911	1	58	30	1	17	2	1	1	0	0	0	0	1	1	2	2	0	0	0	0	1	0	0	0	NA	75.1	63.1	NA	81	52.9	15.5	16.5	12.6	12.7	12.9	170	145	156	136	119	126	117	40	55	53	NA	2.4	2.7	2.5
912	1	61	4	0	NA	3	0	0	1	0	0	0	0	1	4	1	0	0	0	0	0	0	0	NA	NA	NA	29.1	NA	42.2	NA	11.9	11.3	9.6	10	10.1	113	109	92	NA	NA	131	102	95	112	128	3.7	3.4	3.2	NA
913	1	54	49	0	28	4	0	0	1	1	1	0	0	2	3	3	0	1	0	1	0	0	0	0	1	178.1	172.7	261.2	126.6	81.3	10.6	9.8	9.1	8.9	9.5	236	200	226	80	158	100	71	67	63	84	2.6	1.9	2	2.4
914	1	65	10	0	26	3	0	0	1	0	1	0	0	1	4	6	0	0	0	0	0	0	0	0	0	211.8	244.4	178.8	44.8	57.8	11	11.1	8.5	11	9.7	94	109	96	140	311	84	97	89	116	131	2.6	2.7	2.8	2.7
915	2	51	12	1	29	4	0	0	1	0	1	0	1	1	4	5	0	1	0	1	1	1	0	0	0	86.7	193.4	311.8	NA	NA	8.8	8.3	8.9	8.9	7.5	122	62	45	31	11	207	111	78	90	69	3.3	2.1	2.4	3.3
916	2	92	17	0	NA	3	0	0	1	0	0	0	1	2	4	4	0	0	0	0	0	0	1	0	1	50.4	14.9	11.4	250.8	88.6	10	9.2	11.1	11.8	10	NA	301	305	263	173	98	88	69	69	70	NA	2.4	3.2	3
917	2	75	11	0	16	2	0	0	1	0	0	1	0	1	4	6	0	0	0	0	0	0	0	0	1	NA	38.6	86.4	83.2	15.3	13	13.7	11.7	12.1	13.3	NA	229	224	192	262	150	89	88	124	149	NA	3	3	3.4
918	2	65	7	0	NA	2	0	0	1	0	0	0	1	1	4	5	0	0	0	0	0	0	0	1	1	13.4	149.5	211.1	106.7	NA	13	13.7	11.9	12.2	12	289	302	230	310	NA	162	100	84	122	132	NA	3.4	2.8	3
919	2	55	31	0	28	4	1	0	0	0	0	0	1	2	4	5	0	0	0	0	0	1	0	0	0	86.8	NA	NA	213.3	29.7	13.1	14.7	11.9	10.3	11.2	405	313	28	29	26	219	71	98	115	132	3	1.3	2.6	2.5
920	1	55	5	0	NA	2	0	0	0	0	0	0	1	1	4	4	0	0	0	0	0	0	1	NA	NA	NA	161.5	256.2	50	NA	15.3	13.7	13.8	13.1	13	277	200	212	256	NA	195	130	125	126	163	4.9	3.3	3.2	3.4
921	2	37	24	0	NA	2	0	0	0	0	0	0	1	2	1	1	0	0	0	0	0	0	0	0	NA	180.7	177.3	159	52.5	9.8	10.5	8.8	8.4	8.9	9.5	276	234	291	339	439	190	100	90	113	125	3.5	NA	2.8	3.1
922	1	28	12	0	NA	3	0	0	0	0	0	0	0	1	3	3	0	0	0	0	1	0	0	0	0	319.5	358	302.9	203.3	134.2	12.8	12.7	10	11	9.8	NA	281	215	253	424	145	132	85	122	126	NA	3.8	3.1	3.4
923	2	57	6	0	NA	2	0	0	1	0	0	0	1	2	4	4	0	0	0	0	0	0	0	NA	NA	NA	1.1	17.8	13.1	NA	12.9	12.1	12.3	12.3	12.4	NA	195	212	207	NA	128	84	92	115	122	NA	3.6	3.6	3.7
924	2	43	52	0	NA	3	0	0	1	0	0	0	1	1	4	5	0	1	0	0	0	0	0	0	NA	30.1	9.2	NA	2	12.5	10.2	10.2	9.5	10.6	12	199	223	235	297	293	165	155	148	178	190	3.3	3.3	3.2	NA
925	2	52	9	0	15	2	0	0	0	0	0	0	0	1	1	1	0	0	0	0	0	0	0	NA	0	NA	10.3	NA	208.3	155.9	10	9.2	8.6	9	8.9	NA	337	322	324	484	145	107	75	120	131	NA	2.1	3	NA
926	2	67	10	0	20	3	0	0	1	0	1	0	0	1	4	6	0	0	0	0	0	1	0	0	1	NA	86	125.1	95.6	46.7	10	8.2	8.7	9	9	NA	150	153	151	274	162	115	74	118	154	NA	3.3	2.5	3
[truncated: 6 more columns]
